# Supplementary material
Source: PubMed Central journal article supplement (PMC7394295)
Supplement: NIHMS1611272-supplement-Supporting.pdf [file NIHMS1611272-supplement-Supporting.pdf]

## Supporting Information:

# Precision Mapping of O-Linked N-Acetylglucosamine Sites in Proteins using Ultraviolet Photodissociation Mass Spectrometry

Edwin E. Escobar,<sup>‡,†</sup> Dustin T. King,<sup>‡,#</sup> Jesús E. Serrano-Negrón,<sup>#</sup> Matthew G. Alteen,<sup>#</sup> David J. Vocadlo,<sup>&,#,\*</sup> Jennifer S. Brodbelt<sup>&,†</sup>

<sup>†</sup>Department of Chemistry, The University of Texas at Austin, Austin, Texas 78712, United States

<sup>#</sup>Department of Chemistry, Simon Fraser University, Burnaby, British Columbia V5A 1S6, Canada

<sup>\*</sup>Department of Molecular Biology and Biochemistry, Simon Fraser University, Burnaby, British Columbia V5A 1S6, Canada

## Table of Contents

|                                                                                                                                                                                                           |    |
|-----------------------------------------------------------------------------------------------------------------------------------------------------------------------------------------------------------|----|
| <b>Section S1 Methods</b> .....                                                                                                                                                                           | 2  |
| Preparation of O-GlcNAc modified peptides .....                                                                                                                                                           | 2  |
| <b>Section S2 Supplementary Figures</b> .....                                                                                                                                                             | 3  |
| <b>Figure S1:</b> HPLC and MS1 spectra for O-GlcNAcylated peptides.....                                                                                                                                   | 3  |
| <b>Figure S2:</b> HCD-produced oxocarbenium ions from TAB1-O-GlcNAc.....                                                                                                                                  | 4  |
| <b>Figure S3:</b> Expansions of MS/MS spectra for the TAB1-O-GlcNAc glycopeptide (biotin-PVSVYPYS <sub>(g)</sub> SAQSTS, 2+, <i>m/z</i> 869.90) corresponding to the spectra in <b>Figure 2A,B</b> . .... | 5  |
| <b>Figure S4:</b> HCD oxocarbenium ion triggered ETHcD mass spectrum of TAB1-O-GlcNAc .....                                                                                                               | 6  |
| <b>Figure S5:</b> Optimization of pulse number and laser energy for 193 nm UVPD .....                                                                                                                     | 7  |
| <b>Figure S6:</b> HCD induces robust production of oxocarbenium ions across multiple precursor charge states.....                                                                                         | 8  |
| <b>Figure S7:</b> MS/MS comparison of CKII-O-GlcNAc standard glycopeptide. ....                                                                                                                           | 9  |
| <b>Figure S8:</b> Optimization of electron activation period and supplemental collision energy for ETHcD .....                                                                                            | 10 |
| <b>Figure S9:</b> Anti-O-GlcNAc immunoblots confirm O-GlcNAcylation of TAB-1 and Ph1397-1589.....                                                                                                         | 11 |
| <b>Figure S10:</b> Typical liquid chromatographic traces.....                                                                                                                                             | 12 |
| <b>Figure S11:</b> LC-MS/MS analysis of TAB1-O- GlcNAc protein VYPVSVPS395(g1)S396(g2)AQS399(g3)TS401(g4)K glycopeptide.....                                                                              | 13 |
| <b>Figure S12:</b> MS/MS comparison of LWSVDHGEQSVVT[+203]AP glycopeptide.....                                                                                                                            | 14 |
| <b>Figure S13:</b> UVPD analysis of TSVTLSLVMPSQGQMVNGAHSASTLDEATPTLTNQSPRTLQSTNTHTQSSSSSDGGLFR glycopeptide....                                                                                          | 15 |
| <b>Figure S14:</b> ETHcD analysis of VYPVSVPS395(g1)S396(g2)AQS399(g3)TSK glycopeptide .....                                                                                                              | 16 |
| <b>Figure S15:</b> Ph1397-1589 construct sequence with identified O-GlcNAc sites.....                                                                                                                     | 17 |
| <b>Figure S16:</b> HCD oxocarbenium ion-triggered 193 nm UVPD mass spectrum of glycosylated peptide GSS[+203]HHHHHSSGLVPR .....                                                                           | 18 |
| <b>Figure S17:</b> MS/MS comparison of GSSHHHHHS[+203]SGLVPR glycopeptide. ....                                                                                                                           | 19 |
| <b>Figure S18:</b> MS/MS comparison of LSEFPILGASTEVPMS[+203]LPVQAAISAPSPLAMPLGSPLSVALPTLAPLSVVTSGAAPK glycopeptide. ...                                                                                  | 20 |
| <b>Figure S19:</b> HCD oxocarbenium ion-triggered UVPD mass spectra of an O-GlcNAc-modified isoform of peptide LSEFPILGASTEVPMSLPVQAAISAPSPLAMPLGSPLSVALPTLAPLSVVTSGAAPK glycopeptide .....               | 21 |
| <b>Figure S20:</b> MS/MS comparison of SSEVNGTDRPPIS[+203]SWSVDDVSNFIR glycopeptide. ....                                                                                                                 | 22 |

|                                                                                                          |    |
|----------------------------------------------------------------------------------------------------------|----|
| <b>Section S3 Supplementary Tables</b> .....                                                             | 23 |
| <b>Table S1:</b> Summary of O-GlcNAc-containing peptides identified using HCD-triggered-ETHcD.....       | 23 |
| <b>Table S2:</b> Complete list of ions generated by HCD of TAB1-O-GlcNAc peptide .....                   | 24 |
| <b>Table S3:</b> Complete list of ions generated by UVPD of TAB1-O-GlcNAc peptide.....                   | 25 |
| <b>Table S4:</b> Complete list of ions generated by ETHcD of TAB1-O-GlcNAc peptide.....                  | 27 |
| <b>Table S5:</b> Complete list of ions generated by UVPD of HCF-OGlcNAc peptide .....                    | 28 |
| <b>Table S6:</b> Complete list of ions generated by UVPD of CKII-OGlcNAc peptide .....                   | 29 |
| <b>Table S7:</b> Complete list of ions generated by ETHcD of HCF-OGlcNAc.....                            | 31 |
| <b>Table S8:</b> Complete list of ions generated by ETHcD of CKII-OGlcNAc peptide.....                   | 32 |
| <b>Table S9:</b> Complete list of ions generated by UVPD of a tryptic peptide from TAB1.....             | 33 |
| <b>Table S10:</b> Complete list of ions generated by UVPD of a tryptic peptide from TAB1 glycoprotein .  | 35 |
| <b>Table S11:</b> Complete list of ions generated by UVPD of a tryptic peptide from TAB1 glycoprotein .  | 37 |
| <b>Table S12:</b> Complete list of ions generated by UVPD of a tryptic peptide from TAB1.....            | 39 |
| <b>Table S13:</b> Complete list of ions generated by UVPD of a tryptic peptide from TAB1 glycoprotein .  | 41 |
| <b>Table S14:</b> Complete list of ions generated by UVPD of a tryptic peptide from TAB1 glycoprotein .  | 43 |
| <b>Table S15:</b> Complete list of ions generated by UVPD of a tryptic peptide from TAB1 glycoprotein .  | 47 |
| <b>Table S16:</b> Complete list of ions generated by ETHcD of a tryptic peptide from TAB1 glycoprotein   | 49 |
| <b>Table S17:</b> Complete list of ions generated by ETHcD of a tryptic peptide from TAB1 glycoprotein   | 51 |
| <b>Table S18:</b> Complete list of ions generated by ETHcD of a tryptic peptide from TAB1 glycoprotein   | 53 |
| <b>Table S19:</b> Complete list of ions generated by ETHcD of a tryptic peptide from TAB1 glycoprotein   | 55 |
| <b>Table S20:</b> Complete list of ions generated by UVPD of a tryptic peptide from TAB1 glycoprotein .  | 56 |
| <b>Table S21:</b> Complete list of ions generated by UVPD of a tryptic peptide from TAB1 glycoprotein .  | 58 |
| <b>Table S22:</b> Complete list of ions generated by UVPD of a tryptic peptide from TAB1 glycoprotein .  | 60 |
| <b>Table S23:</b> Complete list of ions generated by UVPD of a tryptic peptide from TAB1 glycoprotein .  | 65 |
| <b>Table S24:</b> Complete list of ions generated by UVPD of a tryptic peptide from TAB1 glycoprotein .  | 69 |
| <b>Table S25:</b> Complete list of ions generated by ETHcD of a tryptic peptide from Ph1 glycoprotein... | 72 |
| <b>Table S26:</b> Complete list of ions generated by ETHcD of a tryptic peptide from Ph1 glycoprotein... | 73 |
| <b>Table S27:</b> Complete list of ions generated by ETHcD of a tryptic peptide from Ph1 glycoprotein... | 75 |
| <b>Section S4 Supplementary References</b> .....                                                         | 77 |

## Section S1 Methods

### Preparation of O-GlcNAc modified peptides

Glycopeptides used in this study were generated chemoenzymatically using recombinantly-expressed O-GlcNAc Transferase (OGT). All unmodified peptides were obtained commercially (Biomatik Corporation, Cambridge, ON). Generally, 1-2 mg oligopeptide at a final concentration of 1 mM were incubated with UDP-GlcNAc (5 mM), OGT (1  $\mu$ M, prepared as previously described<sup>1</sup>) and 2U shrimp alkaline phosphatase (New England Biolabs, Whitby, ON) in PBS at pH 7.2 containing 12.5 mM MgCl<sub>2</sub>. Reactions were incubated at 37 °C for 4 h or overnight. Prior to purification, the reactions were terminated by heating at 95 °C for 10 min and then centrifuged at 13,000  $\times$  g for 2 minutes. The supernatants were recovered and were purified on an Agilent 1200 series HPLC equipped with an Agilent XDB-C18 Eclipse reversed-phase column (9.4  $\times$  250 mm, 5  $\mu$  particle size). Glycopeptides were eluted using a mobile phase consisting of H<sub>2</sub>O and CH<sub>3</sub>CN with 0.1% trifluoroacetic acid over a gradient of 10 to 50% acetonitrile as appropriate. Fractions containing the product were lyophilized to yield up to 1 mg glycopeptide as white powders. All glycopeptides were purified to >95% purity and were analyzed by high-resolution mass spectrometry performed using a Bruker maXis Impact UltraHigh-Resolution Quadrupole

Time-of-Flight (UHR-QTOF) mass spectrometer (mobile phase water:acetonitrile 1:1 + 0.1% formic acid, flow rate of 0.3 ml/min). Ions were sprayed in positive mode with a voltage of 4200 V. Nitrogen drying gas was 180 °C at a flow rate of 8 L/min. Data was acquired over a mass range of 300 - 2500 atomic mass units.

**TAB1-O-GlcNAc: Biotin-NH-PVSVYPYS(GlcNAc)SAQSTS-OH (X):**

Prepared according to above method. Yield 1.2 mg (55%), mobile phase gradient 20 – 25% CH<sub>3</sub>CN over 20 min, 2 mL/min flow rate, RT = 15.3 min, HRMS (ESI<sup>+</sup>) Calculated 869.8956, found 869.8870 [M+2H]<sup>2+</sup>.

**CKII-O-GlcNAc: NH<sub>2</sub>-YPPGGSTPV(SGlcNAc)SANMM-OH (X):**

Prepared according to general method. Yield 0.85 mg (68%), mobile phase gradient 20 – 30% CH<sub>3</sub>CN over 20 min, 2 mL/min flow rate, RT = 9.6 min, LRMS (ESI<sup>+</sup>) Calculated 801.34, found 801.36 [M+2H]<sup>2+</sup>.

**HCF-1-O-GlcNAc: NH<sub>2</sub>-YVRVCSNPPCS(SGlcNAc)THETGTTNTATTATS-OH (X):**

Prepared according to general method. Yield 0.5 mg (42%), mobile phase gradient 15-30% % CH<sub>3</sub>CN over 30 min, 2 mL/min flow rate, RT = 14.2 min, HRMS (ESI<sup>+</sup>) Calculated 968.0991, found 968.0948 [M+3H]<sup>3+</sup>.

### Annotation and Labeling of UVPD mass spectra:

Several of the characteristic fragment ions produced by UVPD, including  $\alpha$ ,  $x$ ,  $y$  and  $z$  ions, display contributions from both even and odd electron forms, resulting in mass shifts of  $\pm 1.0078$  Da corresponding to one hydrogen atom. The high density, information-rich nature of the UVPD mass spectra precludes inclusion of these hydrogen shifts in the ion labels, but they are accounted for in the supporting tables.

## Section S2 Supplementary Figures

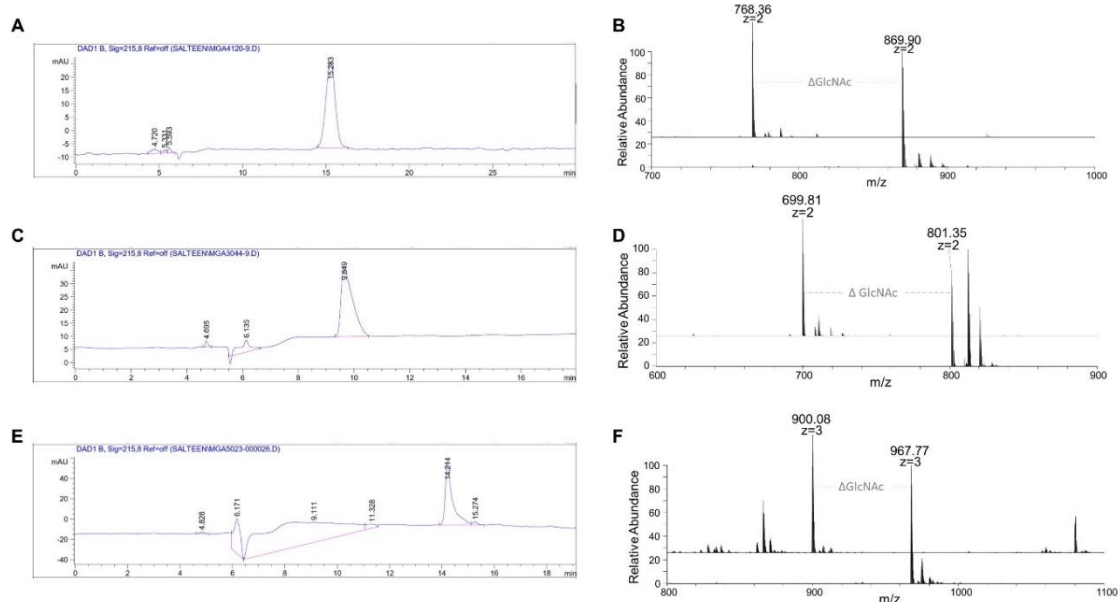

**Figure S1:** HPLC and MS1 spectra for O-GlcNAcylated peptides. A, C, and E: HPLC traces for O-GlcNAcylated peptides A) TAB-1, C) CKII, and E) HCF-1 peptides. HPLC parameters for each peptide are outlined in the above methods section. B, D, and F: Overlay of MS<sup>1</sup> spectra of the unmodified and O-GlcNAc modified forms of (A) TAB1, (B) CKII, and (C) HCF-1 peptides. The mass difference between the pairs of featured ions corresponds to GlcNAc.

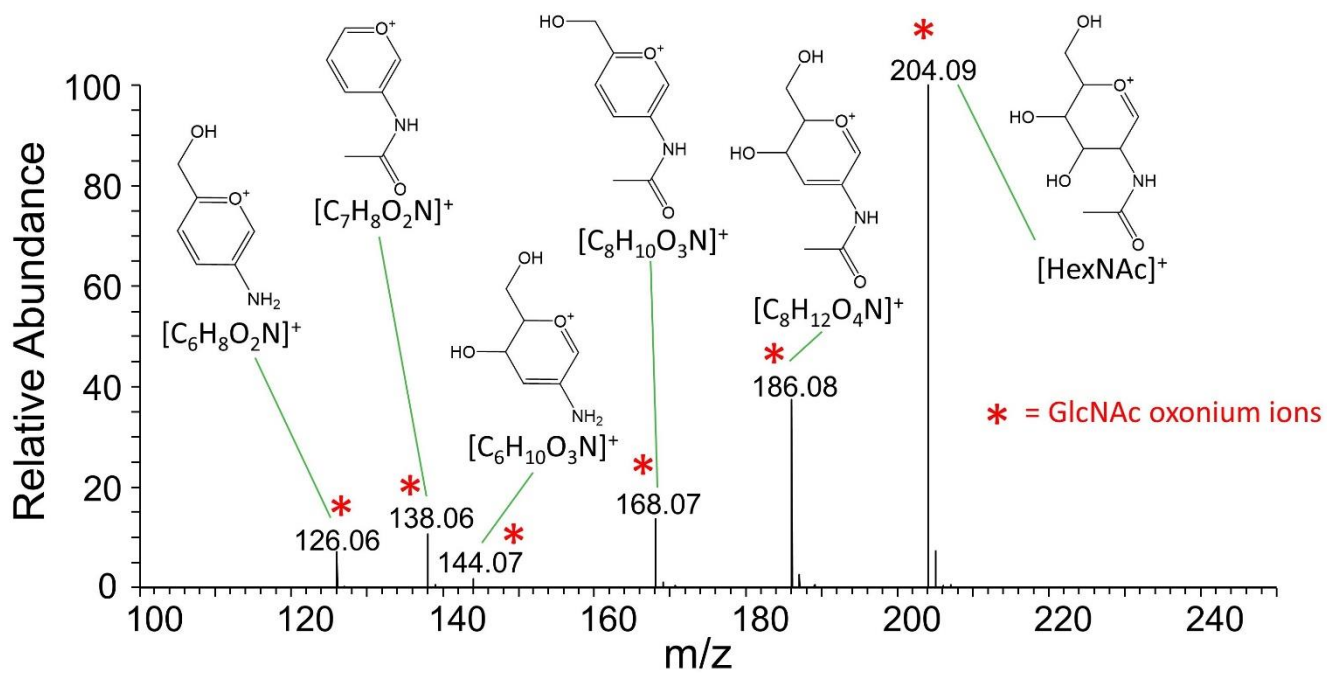

**Figure S2:** HCD-produced oxocarbenium ions from TAB1-O-GlcNAc, all arising from cleavage of the glycosidic bond.

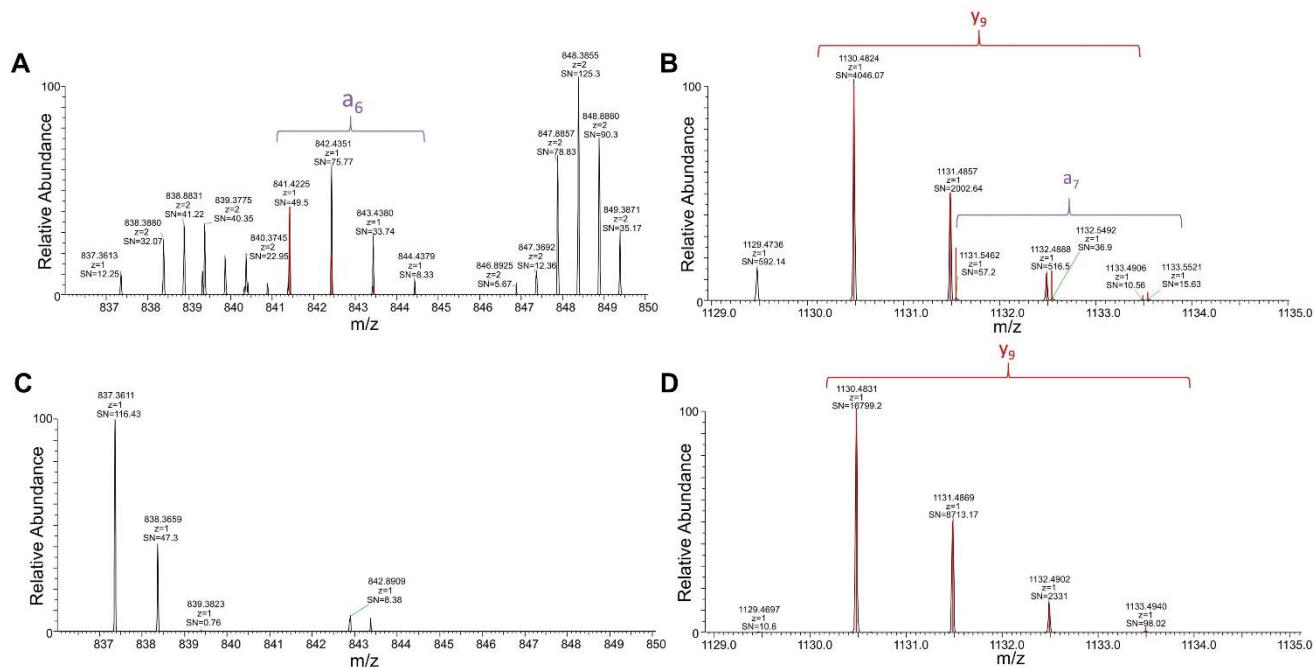

**Figure S3:** Expansions of MS/MS spectra for the TAB1-O-GlcNAc glycopeptide (biotin-PVSVYPYS<sub>(g)</sub>SAQSTS, 2+,  $m/z$  869.90) corresponding to the spectra in **Figure 2A,B**. **(A)** Expansion of  $m/z$  836-850 (UVPD) showing fragment ion  $a_6$ . **(B)** Expansion of  $m/z$  1129-1135 (UVPD) showing the fragment ion assignment of  $a_7$  resolved from the adjacent  $y_9$  ion. **(C)** Expansion of  $m/z$  836-850 (HCD) showing absence of  $a_6$  fragment ion, **(D)** Expansion of  $m/z$  1129-1135 (HCD) showing a  $y_9$  fragment ion with no  $a_7$  ion.

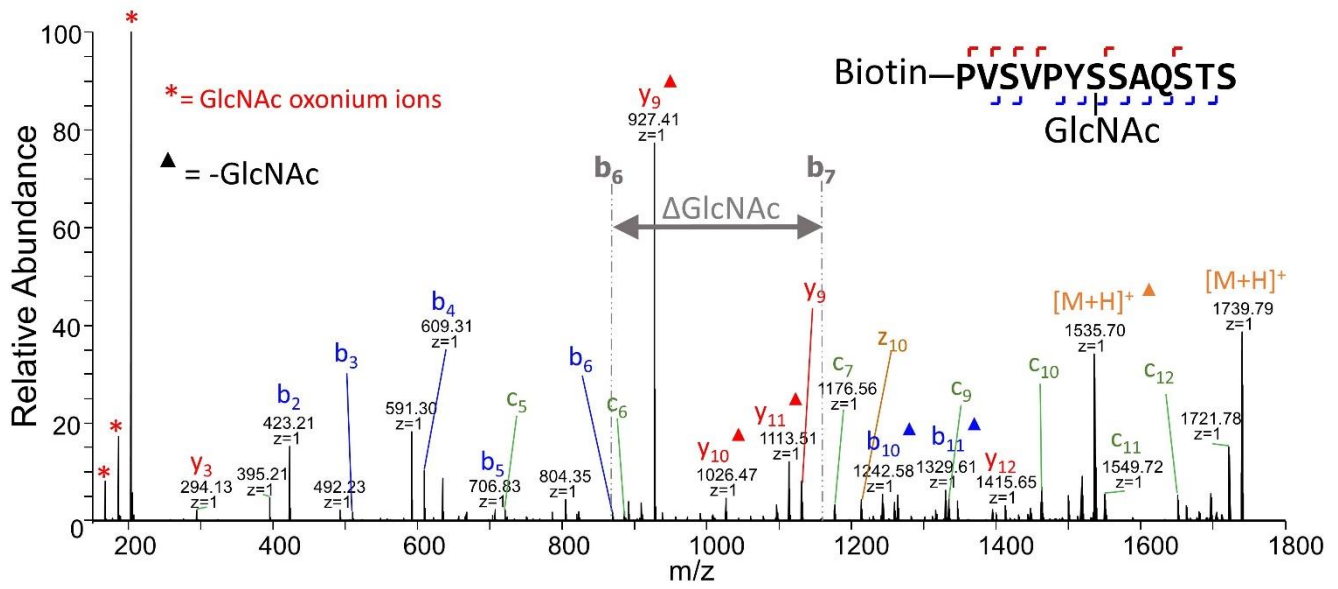

**Figure S4:** HCD oxocarbenium ion triggered EThcD mass spectrum of TAB1-O-GlcNAc. EThcD was run with a 50 ms activation time and 33% supplemental energy, generating the spectrum above for the TAB1-O-GlcNAc peptide (Biotin-PVSVPYSSAQSTS, 2+,  $m/z$  869.90); PCS score:  $3.1 \times 10^{-36}$ . A sequence map is shown in the upper right, and the complete list of identified fragment ions is shown in **Table S4**.

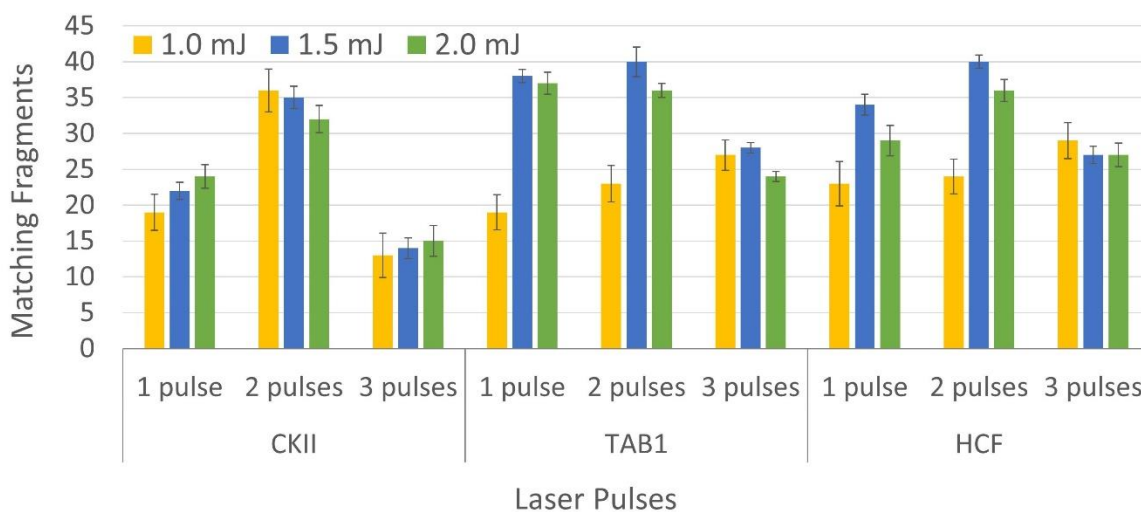

**Figure S5:** Optimization of pulse number and laser energy for 193 nm UVPD based on the number of assigned fragment ions. Experiments were performed using CKII-O-GlcNAc (YPGGSTPVS(g)SANMM; 2+,  $m/z$  801.30), TAB1-O-GlcNAc (biotin-PVSVYPYS(g)SAQSTS; 2+,  $m/z$  869.9), and HCF-O-GlcNAc (YVRVCSNPPCS(g)THETGTTNTATTATS, 3+,  $m/z$  967.76). Error bars correspond to standard deviations from technical triplicates.

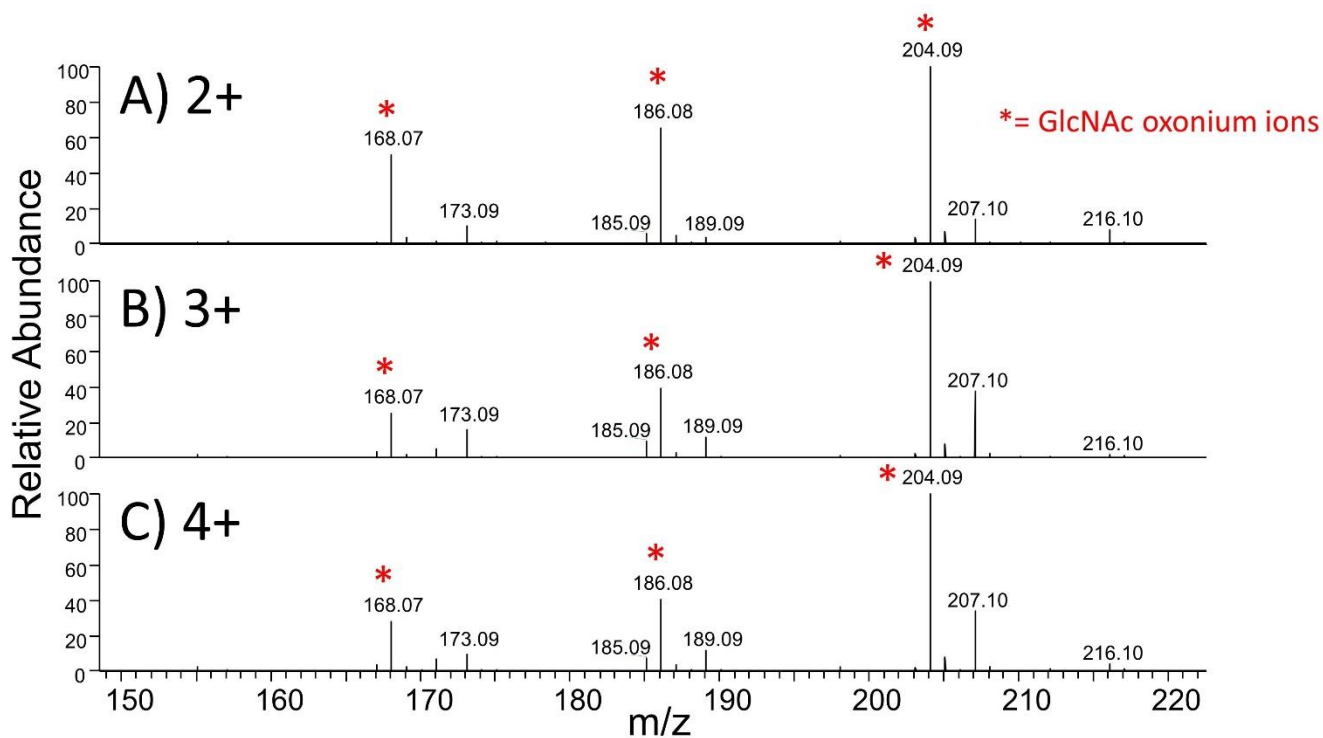

**Figure S6:** HCD induces robust production of oxocarbenium ions across multiple precursor charge states upon activation of the HCF-1-O-GlcNAc peptide. Spectra in A-C represent the oxocarbenium ions produced upon HCD of 2+, 3+, and 4+ charge states of the peptide, respectively. Fragmentation of the HCF-1-O-GlcNAc peptide (YVRVCSNPPCS(g)THETGTTNTATTATS) was induced using a normalized collision energy of 28.



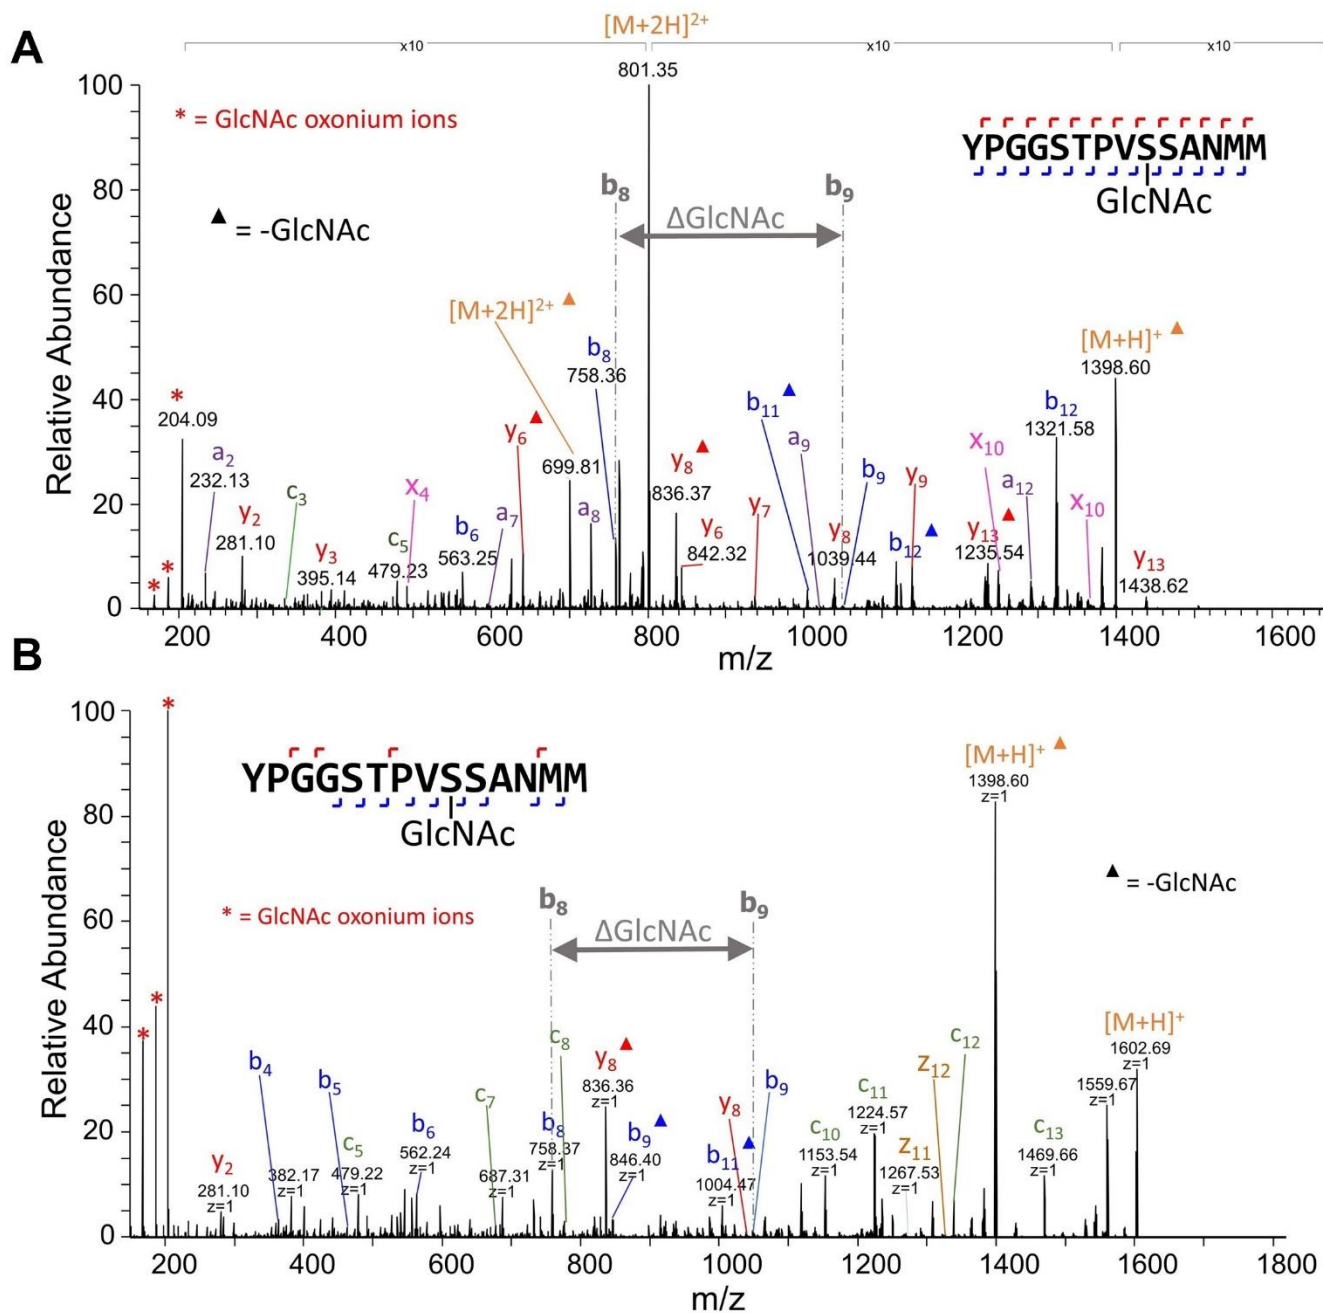

**Figure S7:** MS/MS comparison of CKII-O-GlcNAc standard glycopeptide. The double-headed arrows and  $\Delta\text{GlcNAc}$  indicate the mass shifts representing loss of the O-GlcNAc-modified amino acid between fragment ions (labelled in grey at each end of the double headed arrow) that bracket the site of the modification. **(A)** 193 nm UVPD mass spectrum of CKII-O-GlcNAc peptide. Fragmentation of the CKII-O-GlcNAc peptide (YPGGSTPVSSANMM, 2+,  $m/z$  801.3) was induced using two laser pulses at 1.5 mJ laser energy per pulse. A sequence map is shown in the upper right, and the complete list of identified fragment ions is shown in **Table S6**. **(B)** HCD oxocarbenium ion triggered EThcD mass spectrum of CKII-O-GlcNAc. EThcD was run with a 50 ms activation time and 25% supplemental energy, generating the spectrum above for the CKII-O-GlcNAc peptide (YPGGSTPV(g)SANMM; 2+,  $m/z$  801.30). A sequence map is shown in the upper left, and the complete list of identified fragment ions is shown in **Table S8**.

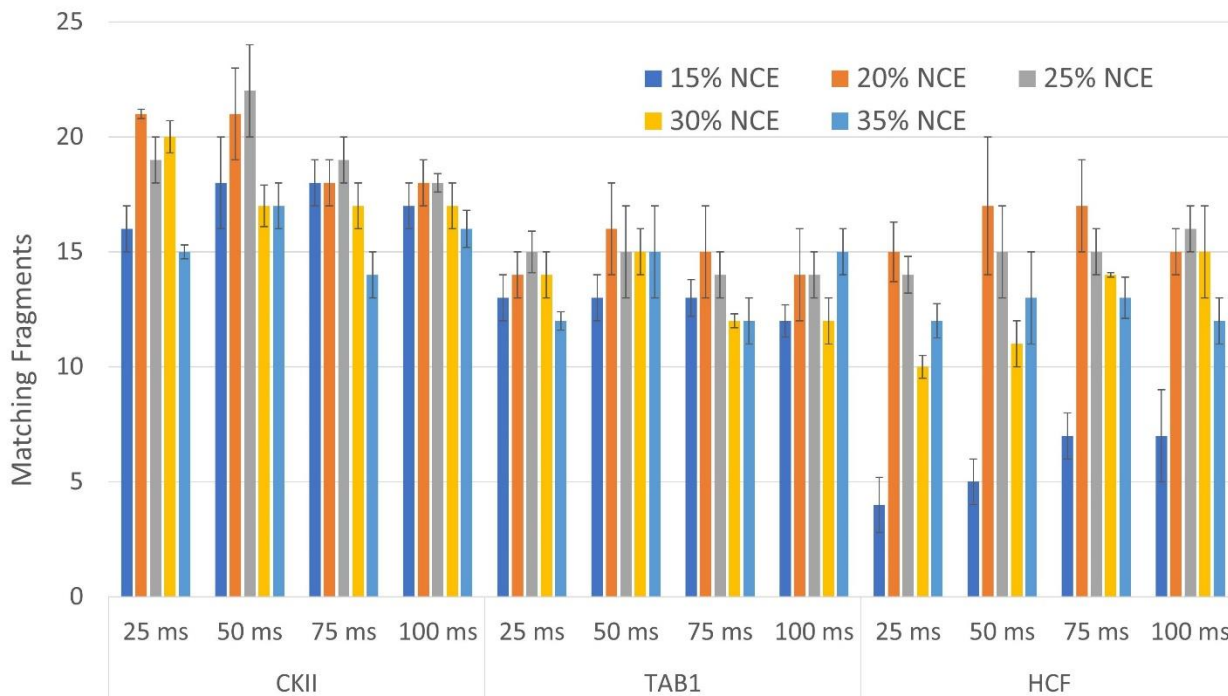

**Figure S8:** Optimization of electron activation period and supplemental collision energy for EThcD based on the number of assigned fragment ions. Experiments were performed using CKII-O-GlcNAc (YPGGSTPVS(g)SANMM; 2+,  $m/z$  801.30), TAB1-O-GlcNAc (biotin-PVSVYPYS(g)SAQSTS; 2+,  $m/z$  869.9), and HCF-O-GlcNAc (YVRVCSNPPCS(g)THETGTTNTATTATS, 3+,  $m/z$  967.76). Error bars correspond to standard deviations from technical triplicates.

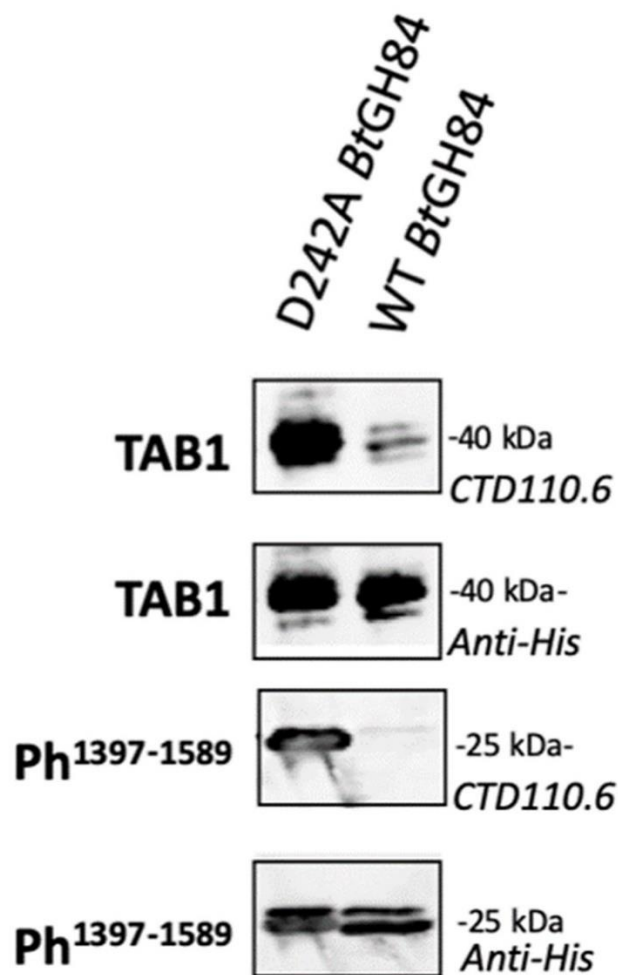

**Figure S9:** Anti-O-GlcNAc Immunoblots confirm O-GlcNAcylation of TAB-1 and Ph1397-1589. Recombinant protein (10 $\mu$ M) was incubated in reaction buffer (20mM sodium phosphate pH 7.2, 150 mM NaCl) in the presence of either 1  $\mu$ M WT or D242A BtGH84 overnight. Following reaction, 0.25  $\mu$ g total protein was loaded per well for immunoblotting.

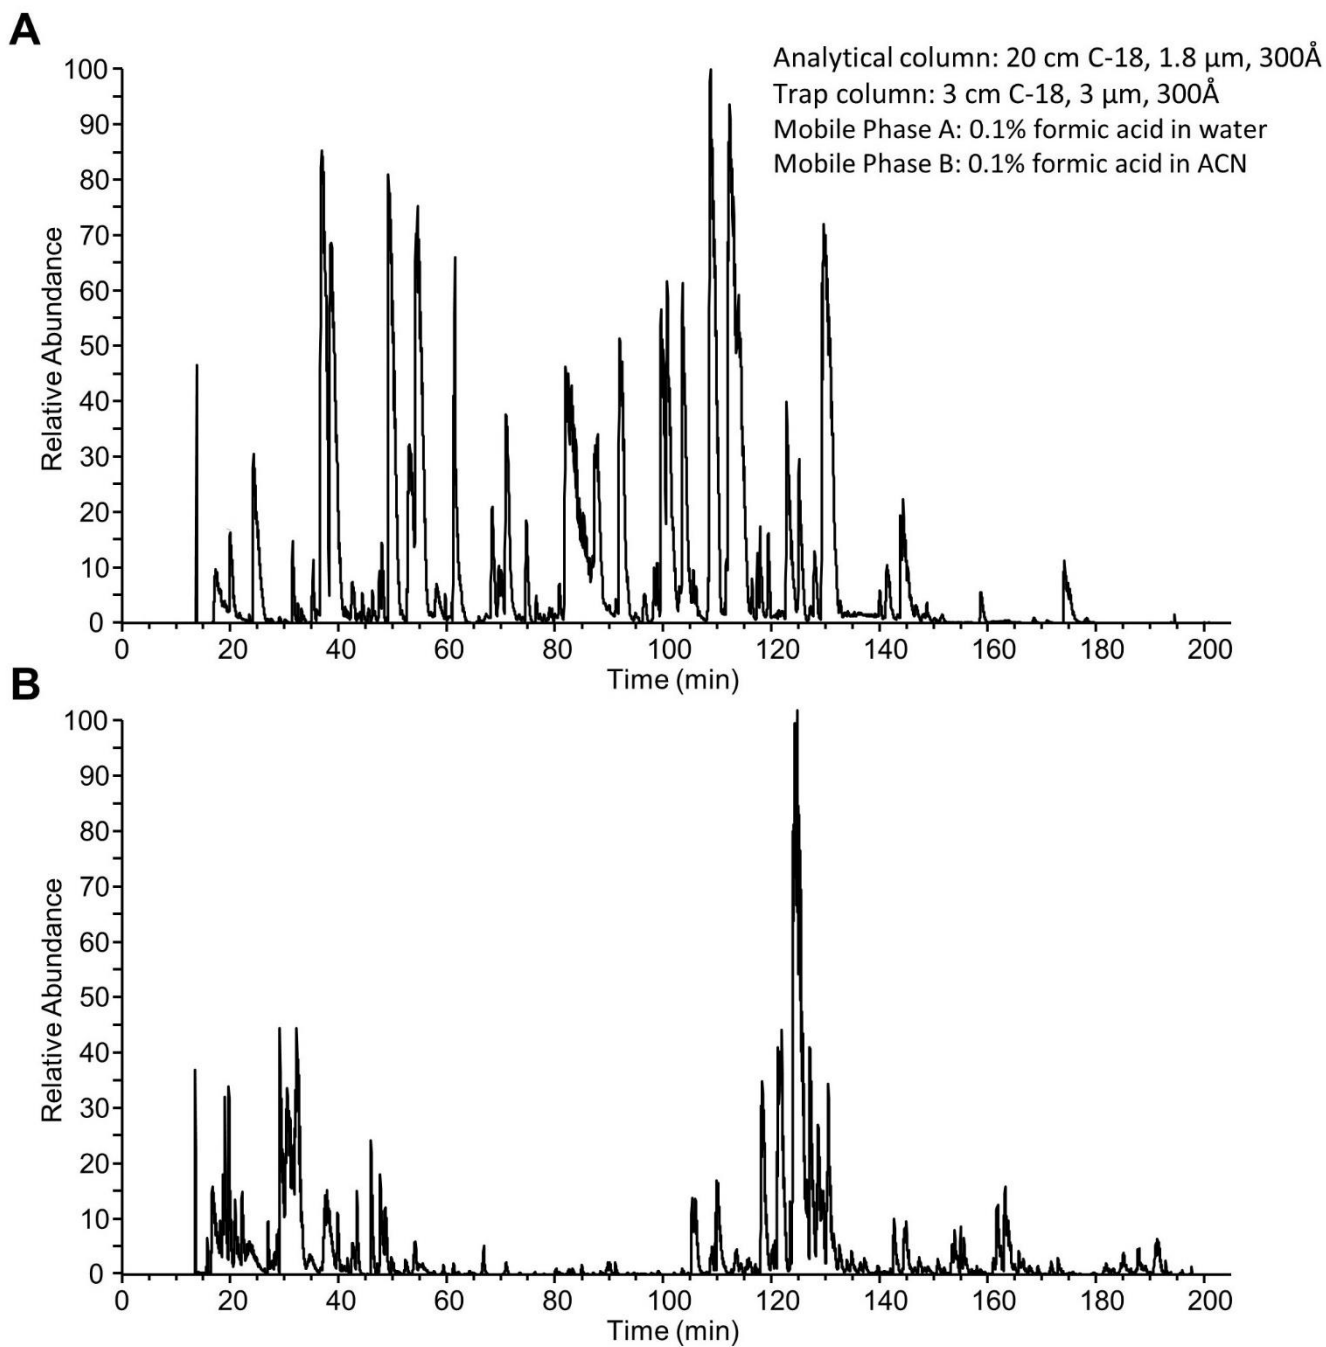

**Figure S10:** Typical liquid chromatographic traces of a (A) trypsin digest of TAB1-O-GlcNAc modified protein, and (B) trypsin digest of Ph<sup>1397-1589</sup>-O-GlcNAc modified protein.

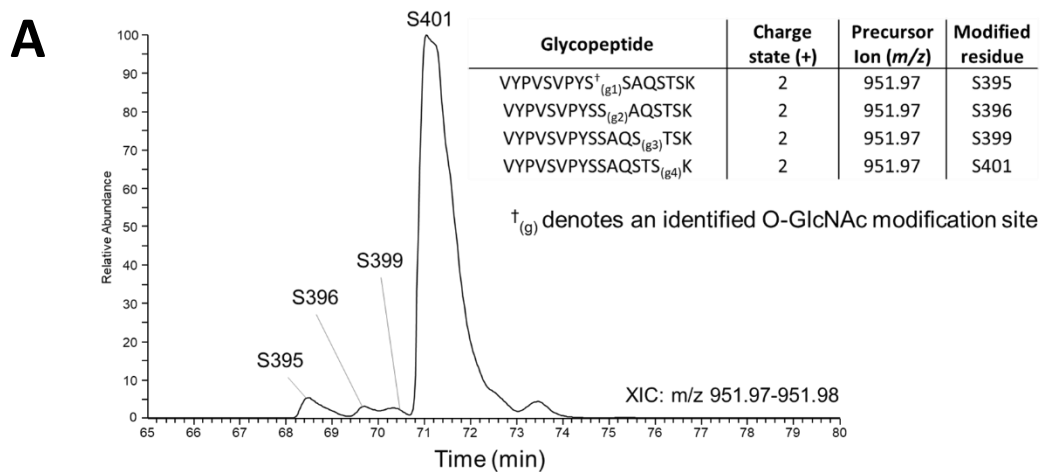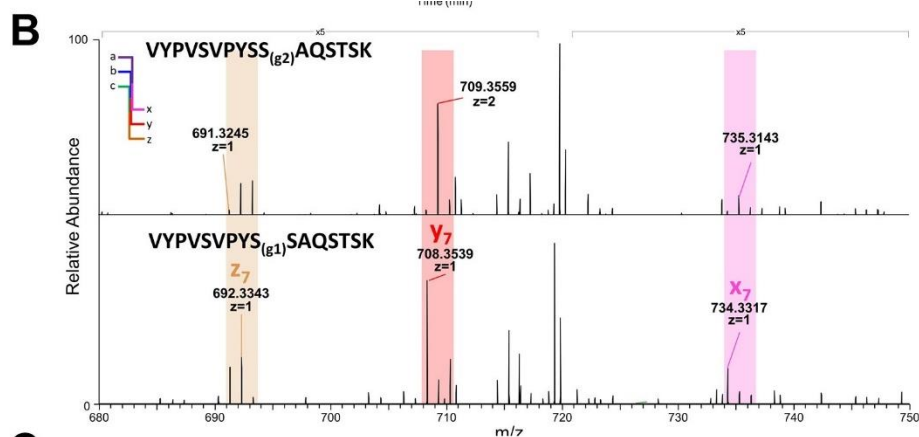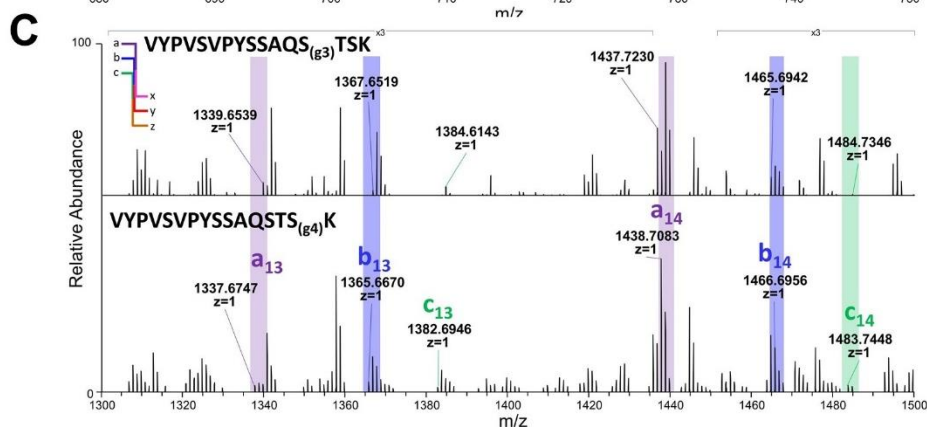

**Figure S11:** LC-MS/MS analysis of TAB1-O- GlcNAc protein VYPVSVPS395(g1)S396(g2)AQS399(g3)TS401(g4)K glycopeptide. **(A)** Extracted ion chromatogram of *m/z* 951.97-951.98 from LC-MS of the tryptic digest of TAB1-O-GlcNAc modified protein showing each confidently identified positional isomer of the VYPVSVPS395(g1)S396(g2)AQS399(g3)TS401(g4)K glycopeptide. **(B)** Comparison of expanded *m/z* regions of the UVPD spectra obtained for the S395 and S396 glycopeptide isomers showing distinctive C-terminal fragment ions differentiating the two isomers. The unmodified *x*<sub>7</sub>, *y*<sub>7</sub>, and *z*<sub>7</sub> fragment ions were found only for the S396 glycoisomer and not for the S395 glycoisomer. **(C)** Comparison of expanded *m/z* regions of the UVPD spectra obtained for the S399 and S401 glycopeptide isomers showing distinctive N-terminal fragment ions differentiating the two isomers. The unmodified *a*<sub>13</sub>, *a*<sub>14</sub>, *b*<sub>13</sub>, *b*<sub>14</sub>, *c*<sub>13</sub>, and *c*<sub>14</sub> fragment ions were found only for the S401 glycoisomer and not for the S399 glycoisomer.

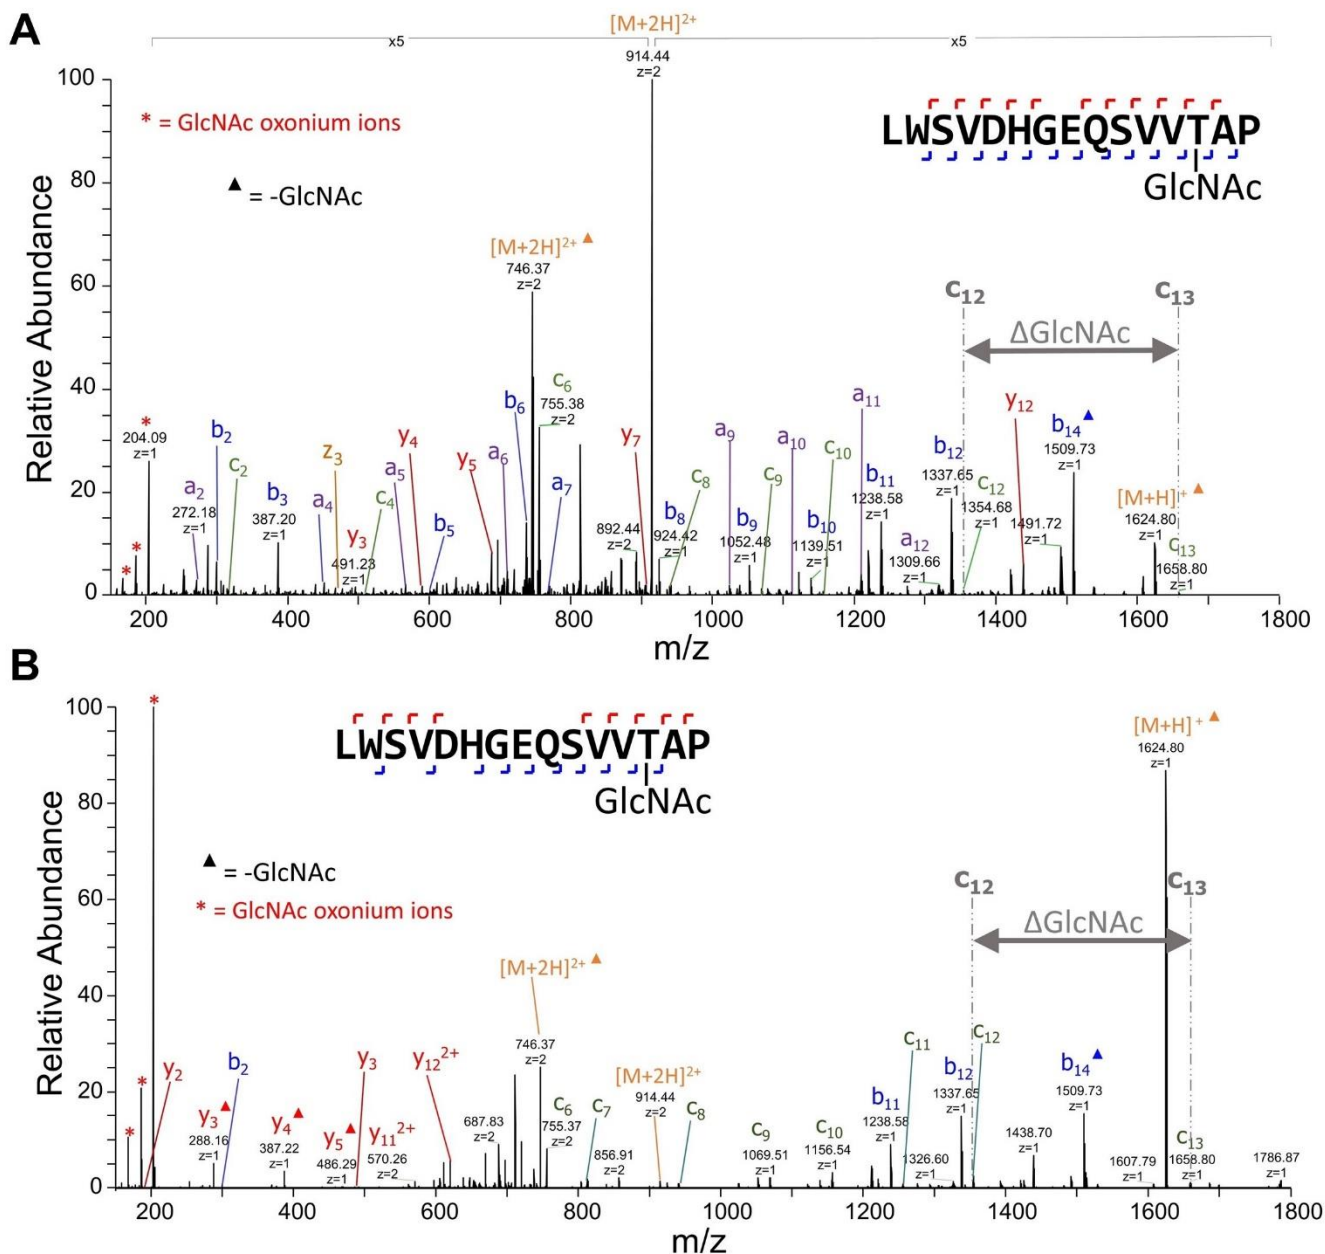

**Figure S12:** MS/MS comparison of LWSVDHGEQSVVT[+203]AP glycopeptide. The double-headed arrows and  $\Delta$ GlcNAc indicate the mass shifts representing loss of the O-GlcNAc-modified amino acid between fragment ions (labelled in grey at each end of the double headed arrow) that bracket the site of the modification. **(A)** HCD oxocarbenium ion-triggered 193 nm UVPD mass spectrum of glycosylated peptide LWSVDHGEQSVVT[+203]AP (2+,  $m/z$  914.43) using two pulses of 1.5 mJ. A sequence map is shown in the upper right, and the complete list of identified fragment ions is shown in **Table S13**. **(B)** HCD oxocarbenium ion-triggered ETHcD mass spectrum of glycosylated peptide LWSVDHGEQSVVT[+203]AP (2+,  $m/z$  914.43) using 50 ms activation time and 25% supplemental energy. A sequence map is shown in the upper right and the complete list of identified fragment ions is shown in **Table S19**.

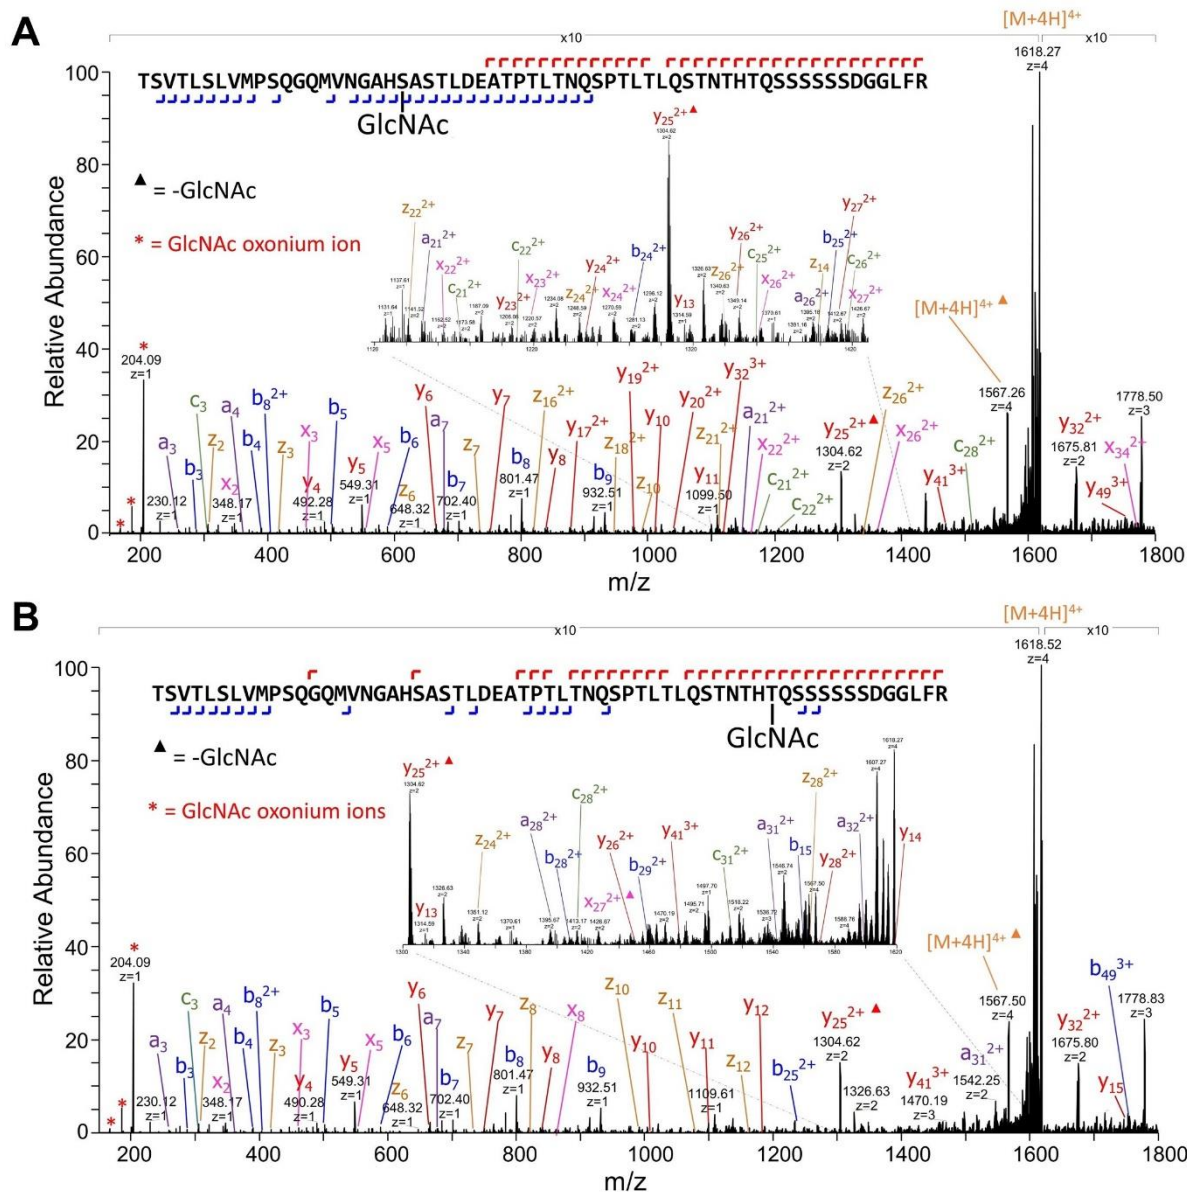

**Figure S13:** UVPD analysis of TSVTLSLVMP SQQM VNGAHSASTLDEATPTLTNQSP TLT LQSTNTHTQSSSSSSD GGLFR glycopeptide. (A) HCD oxocarbenium ion-triggered UVPD mass spectra of an O-GlcNAc-modified isoform TSVTLSLVMP SQQM VNGAHS[+203]ASTLDEATPTLTNQSP TLT LQSTNTHTQSSSSSSD GGLFR (4+,  $m/z$  1617.52) using two pulses of 1.5 mJ. A sequence map is shown above the spectrum. The inset shows an expansion of the region from  $m/z$  1100-1400 to illustrate the level of fragmentation detail that prevents every fragment ion from being labelled in the UVPD spectra. The complete list of identified fragment ions is shown in **Table S14**. (B) HCD oxocarbenium ion-triggered UVPD mass spectra of TSVTLSLVMP SQQM VNGAHSASTLDEATPTLTNQSP TLT LQSTNTHT[+203]QSSSSSSD GGLFR (4+,  $m/z$  1617.52) using two pulses of 1.5 mJ. A sequence map is shown above the spectrum, and the complete list of identified fragment ions is shown in **Table S15**.

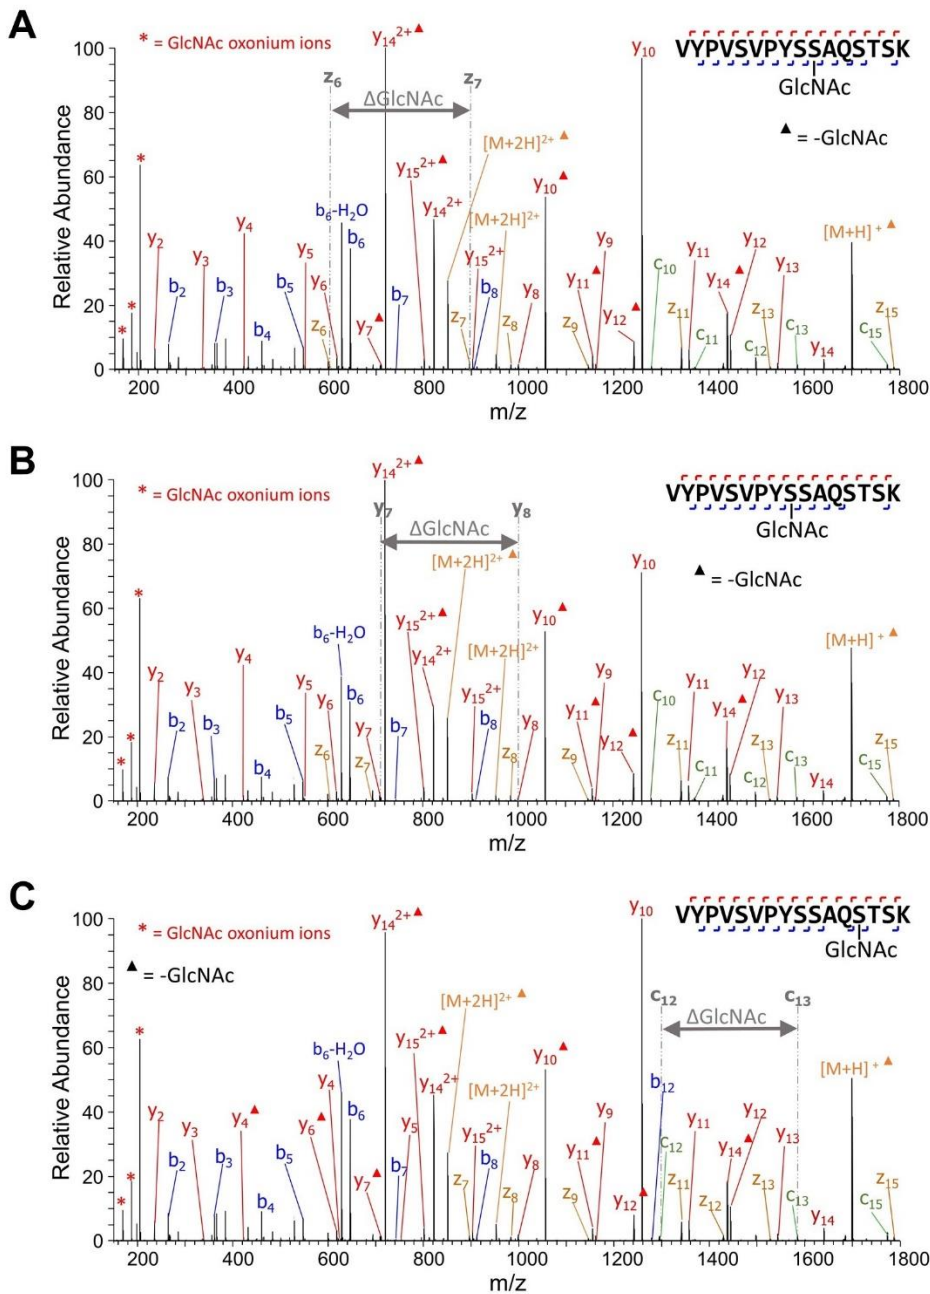

**Figure S14:** EThcD analysis of VYPVSVPS395(g1)S396(g2)AQS399(g3)TSK glycopeptide using 50 ms activation time and 25% supplemental energy. **(A)** HCD oxocarbenium ion-triggered EThcD mass spectrum of glycosylated peptide VYPVSVPYSS[+203]AQSTSK (2+, m/z 951.97) from TAB-1-O-GlcNAc tryptic. A sequence map is shown in the upper right, and the complete list of identified fragment ions is shown in **Table S16**. **(B)** HCD oxocarbenium ion-triggered EThcD mass spectrum of glycosylated peptide VYPVSVPYSS[+203]SAQTSTK (2+, m/z 951.97). A sequence map is shown in the upper right, and the complete list of identified fragment ions is shown in **Table S17**. **(C)** HCD oxocarbenium ion-triggered EThcD mass spectrum of glycosylated peptide VYPVSVPYSSAQS[+203]TSK (2+, m/z 951.97) from TAB-1-O-GlcNAc tryptic digest. A sequence map is shown in the upper right, and the complete list of identified fragment ions is shown in **Table S18**.



|            |            |            |            |            |
|------------|------------|------------|------------|------------|
| 10         | 20         | 30         | 40         | 50         |
| MGSSHHHHHH | SSGLVPRGSH | GVGSGETNGL | GTGGIVGVDA | MALVDRLDEA |
| 60         | 70         | 80         | 90         | 100        |
| MAEEKMQTEA | TPKLSEFPI  | LGASTEVPPI | SLPVQAAISA | PSPLAMPLGS |
| 110        | 120        | 130        | 140        | 150        |
| PLSVALPTLA | PLSWTSGAA  | PKSSEVNGTD | RPPISSWSVD | DVSNFIRELP |
| 160        | 170        | 180        | 190        | 200        |
| GCQDYVDDFI | QQEIDGQALL | LLKEKHLVNA | MGMKLGPAK  | IVAKVESIKE |
| 210        |            |            |            |            |
| VPPPGEAKDP | GAQ        |            |            |            |

|                                                                                |
|--------------------------------------------------------------------------------|
| <p><b>S/T</b> = Observed glycosite</p> <p><b>S/T</b> = Potential glycosite</p> |
|--------------------------------------------------------------------------------|

**Figure S15:** Ph1397-1589 construct sequence with identified O-GlcNAc sites highlighted.

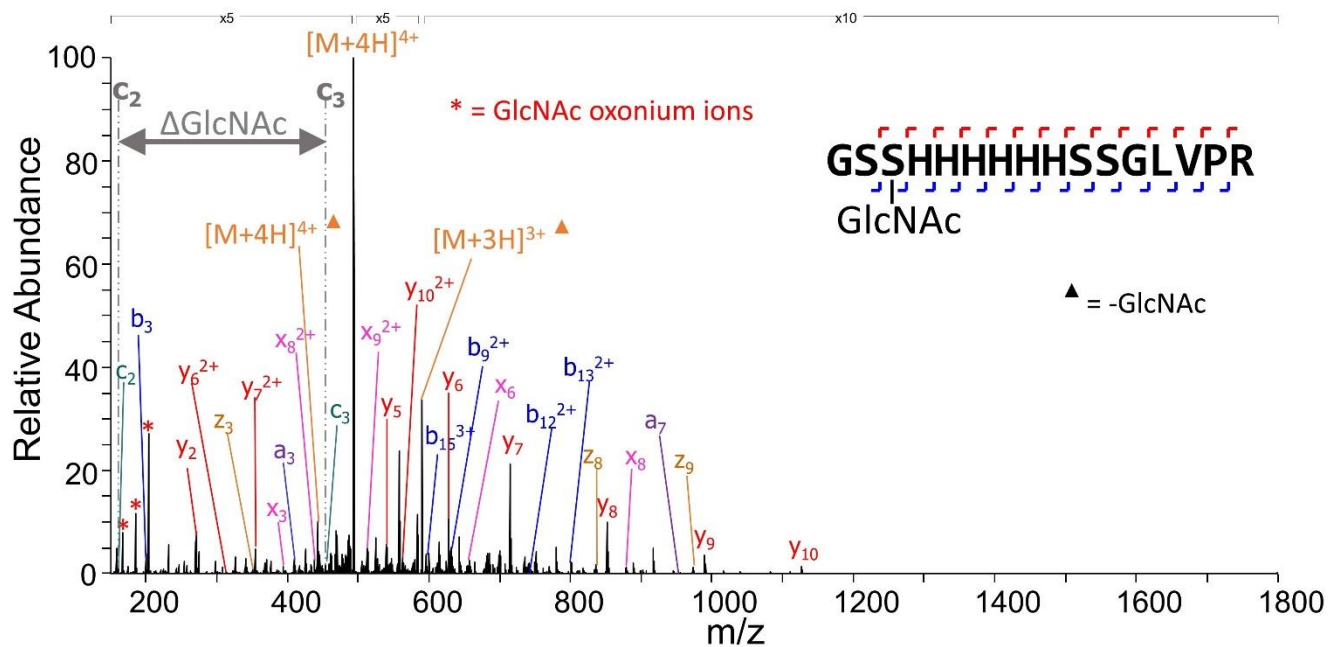

**Figure S16:** HCD oxocarbenium ion-triggered 193 nm UVPD mass spectrum of glycosylated peptide GSS[+203]HHHHHHSSGLVPR (4+, m/z 493.73) from Ph1397-1589-O-GlcNAc tryptic digest using two pulses of 1.5 mJ. A sequence map is shown in the upper right, and the complete list of identified fragment ions is shown in **Table S20**.

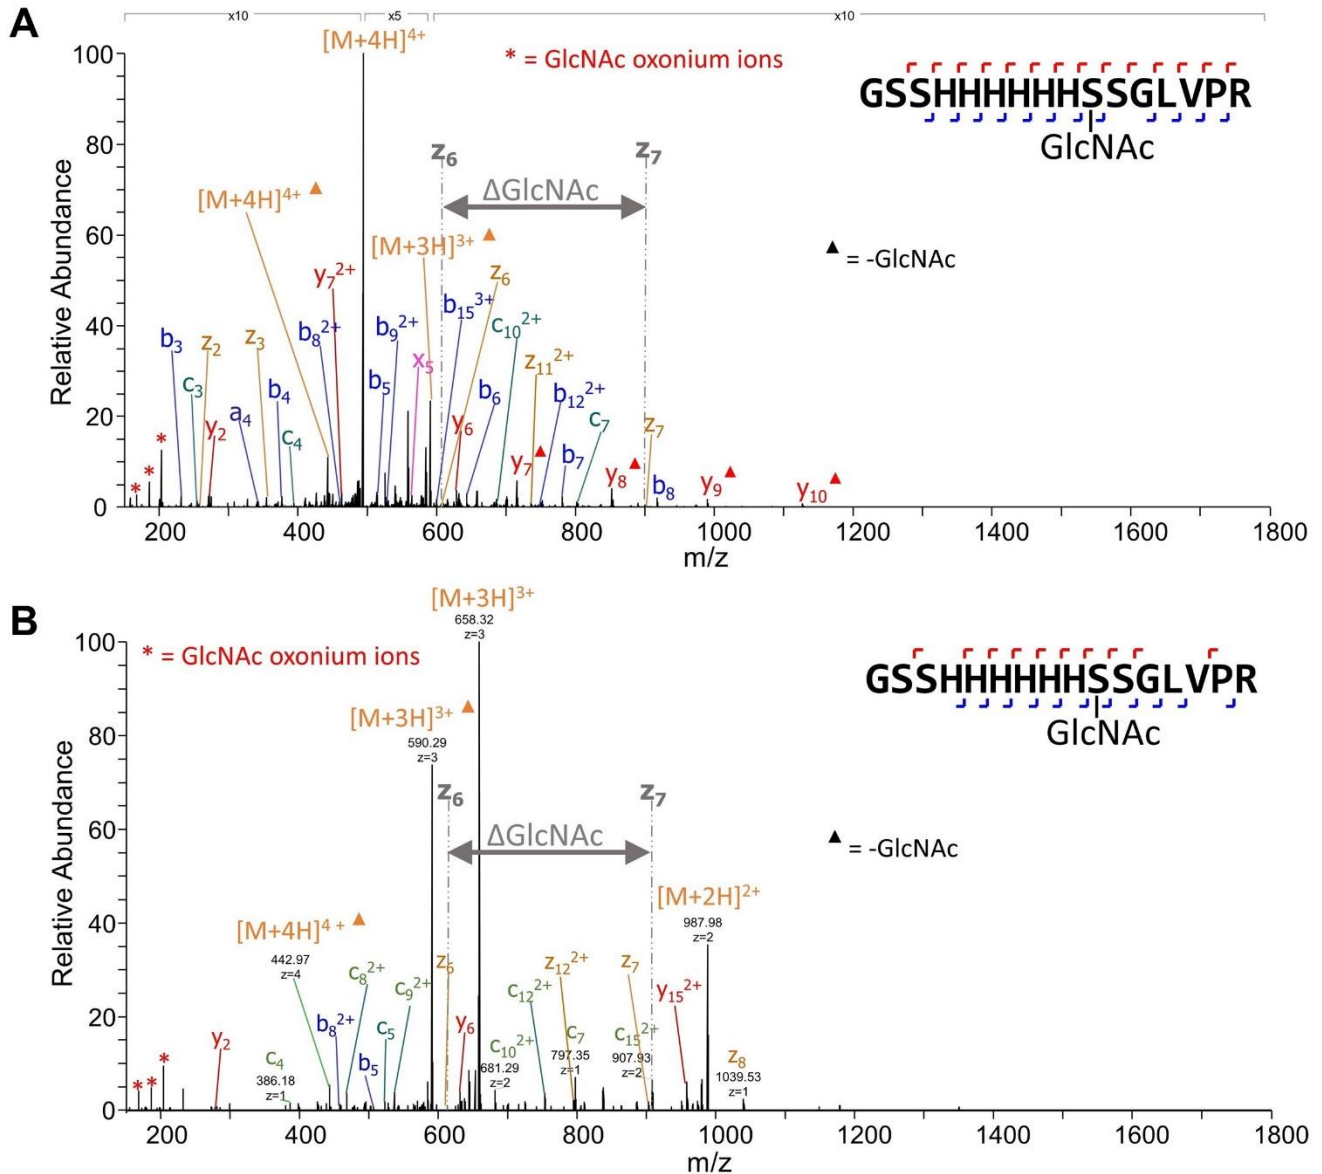

**Figure S17:** MS/MS comparison of GSSH HHHHHS[+203]SGLVPR glycopeptide. The double-headed arrows and  $\Delta\text{GlcNAc}$  indicate the mass shifts representing loss of the O-GlcNAc-modified amino acid between fragment ions (labelled in grey at each end of the double headed arrow) that bracket the site of the modification. **(A)** HCD oxocarbenium ion-triggered 193 nm UVPD mass spectrum of glycosylated peptide GSSH HHHHHS[+203]SGLVPR (4+, m/z 493.73) from Ph1397-1589-O-GlcNAc tryptic digest using two pulses of 1.5 mJ. A sequence map is shown in the upper right, and the complete list of identified fragment ions is shown in **Table S21**. **(B)** HCD oxocarbenium ion-triggered EThcD mass spectrum of glycosylated peptide GSSH HHHHHS[+203]SGLVPR (4+, m/z 493.73) using 50 ms activation time and 25% supplemental energy. A sequence map is shown in the upper right, and the complete list of identified fragment ions is shown in **Table S25**.

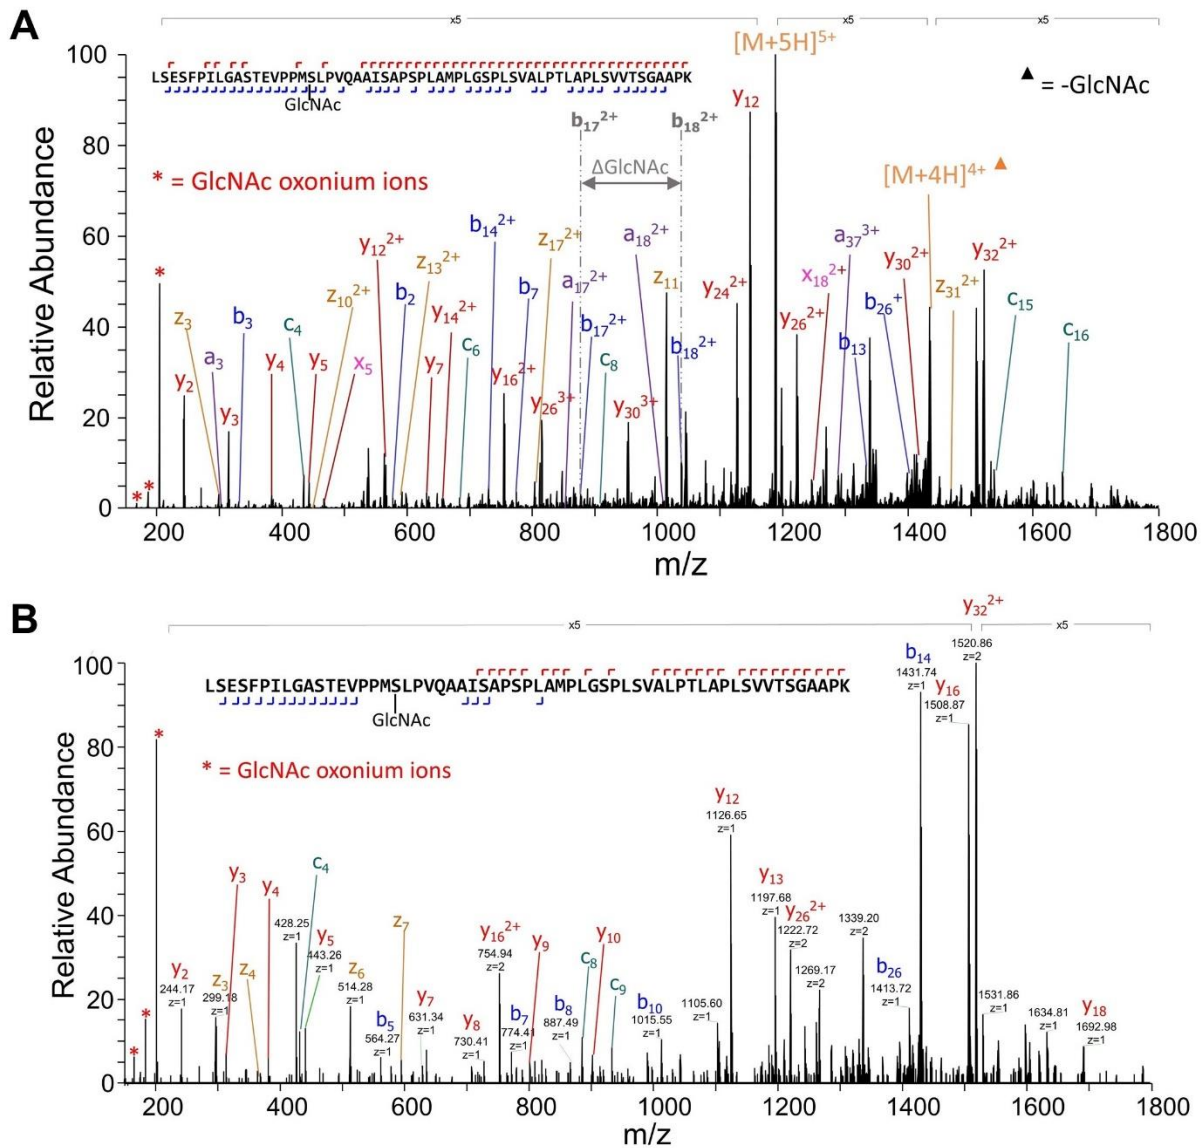

**Figure S18:** MS/MS comparison of LSESFPILGASTEVPMS[+203]LPVQAAISAPSPLAMPLGSPSVALPTLAPLSVVTSGAAPK glycopeptide. **(A)** HCD oxocarbenium ion-triggered UVPD mass spectra of an O-GlcNAc-modified isoform of peptide originating from a Ph1397-1589-O-GlcNAc tryptic digest. 193 nm UVPD of LSESFPILGASTEVPMS[+203]LPVQAAISAPSPLAMPLGSPSVALPTLAPLSVVTSGAAPK (5+, m/z 1188.24). Two laser pulses of 1.5 mJ were used. The double-headed arrows and  $\Delta\text{GlcNAc}$  indicate the mass shifts representing loss of the O-GlcNAc-modified amino acid between fragment ions (labelled in grey at each end of the double headed arrow) that bracket the site of the modification. A sequence map is shown above the spectrum, and the complete list of identified fragment ions is shown in **Table S22**. **(B)** HCD oxocarbenium ion-triggered ETHcD mass spectra of LSESFPILGASTEVPMS[+203]LPVQAAISAPSPLAMPLGSPSVALPTLAPLSVVTSGAAPK (5+, m/z 1188.24) using 50 ms activation time and 25% supplemental energy were used for ETHcD. A sequence map is shown above the spectrum, and the complete list of identified fragment ions is shown in **Table S26**.

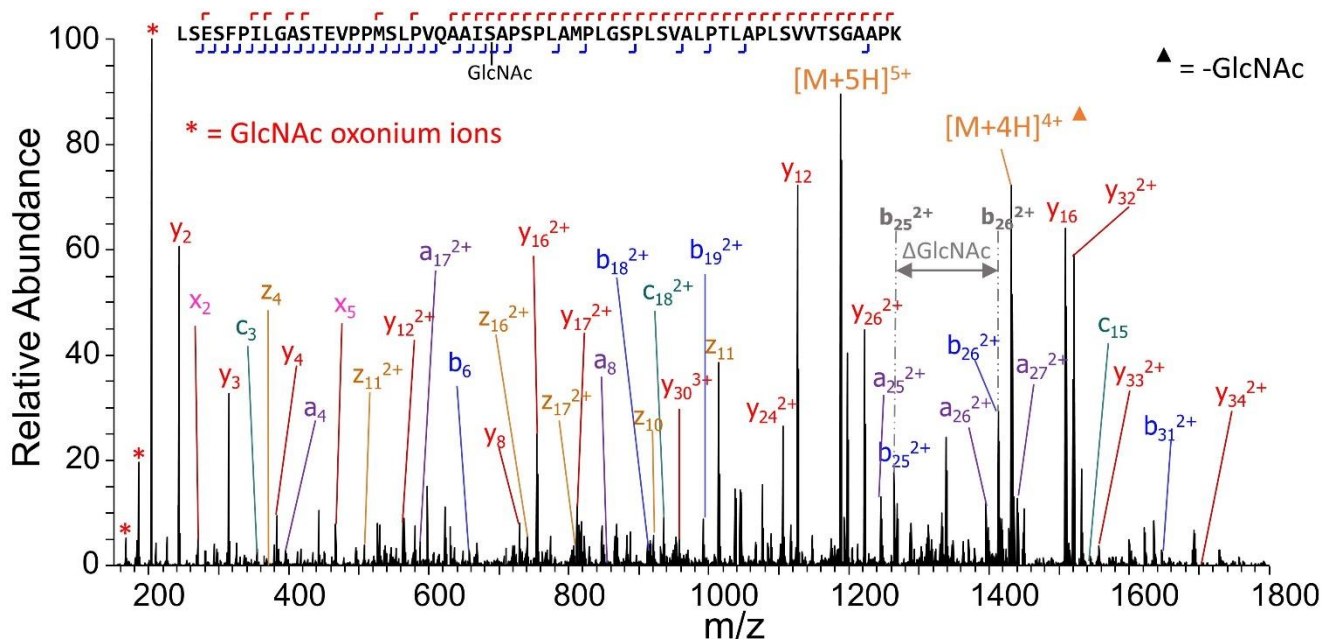

**Figure S19:** HCD oxocarbenium ion-triggered UVPD mass spectra of an O-GlcNAc-modified isoform of peptide LSEFPILGASTEVPMSLPVQAAISAPSPLAMPLGSPLSVALPTLAPLSVVTSGAAPK glycopeptide originating from a Ph1397-1589-O-GlcNAc tryptic digest. 193 nm UVPD of LSEFPILGASTEVPMSLPVQAAIS[+203]APSPLAMPLGSPLSVALPTLAPLSVVTSGAAPK (5+,  $m/z$  1188.24). The double-headed arrows and  $\Delta$ GlcNAc indicate the mass shifts representing loss of the O-GlcNAc-modified amino acid between fragment ions (labelled in grey at each end of the double headed arrow) that bracket the site of the modification. Two laser pulses of 1.5 mJ were used. A sequence map is shown above the spectrum, and the complete list of identified fragment ions is shown in **Table S23**.

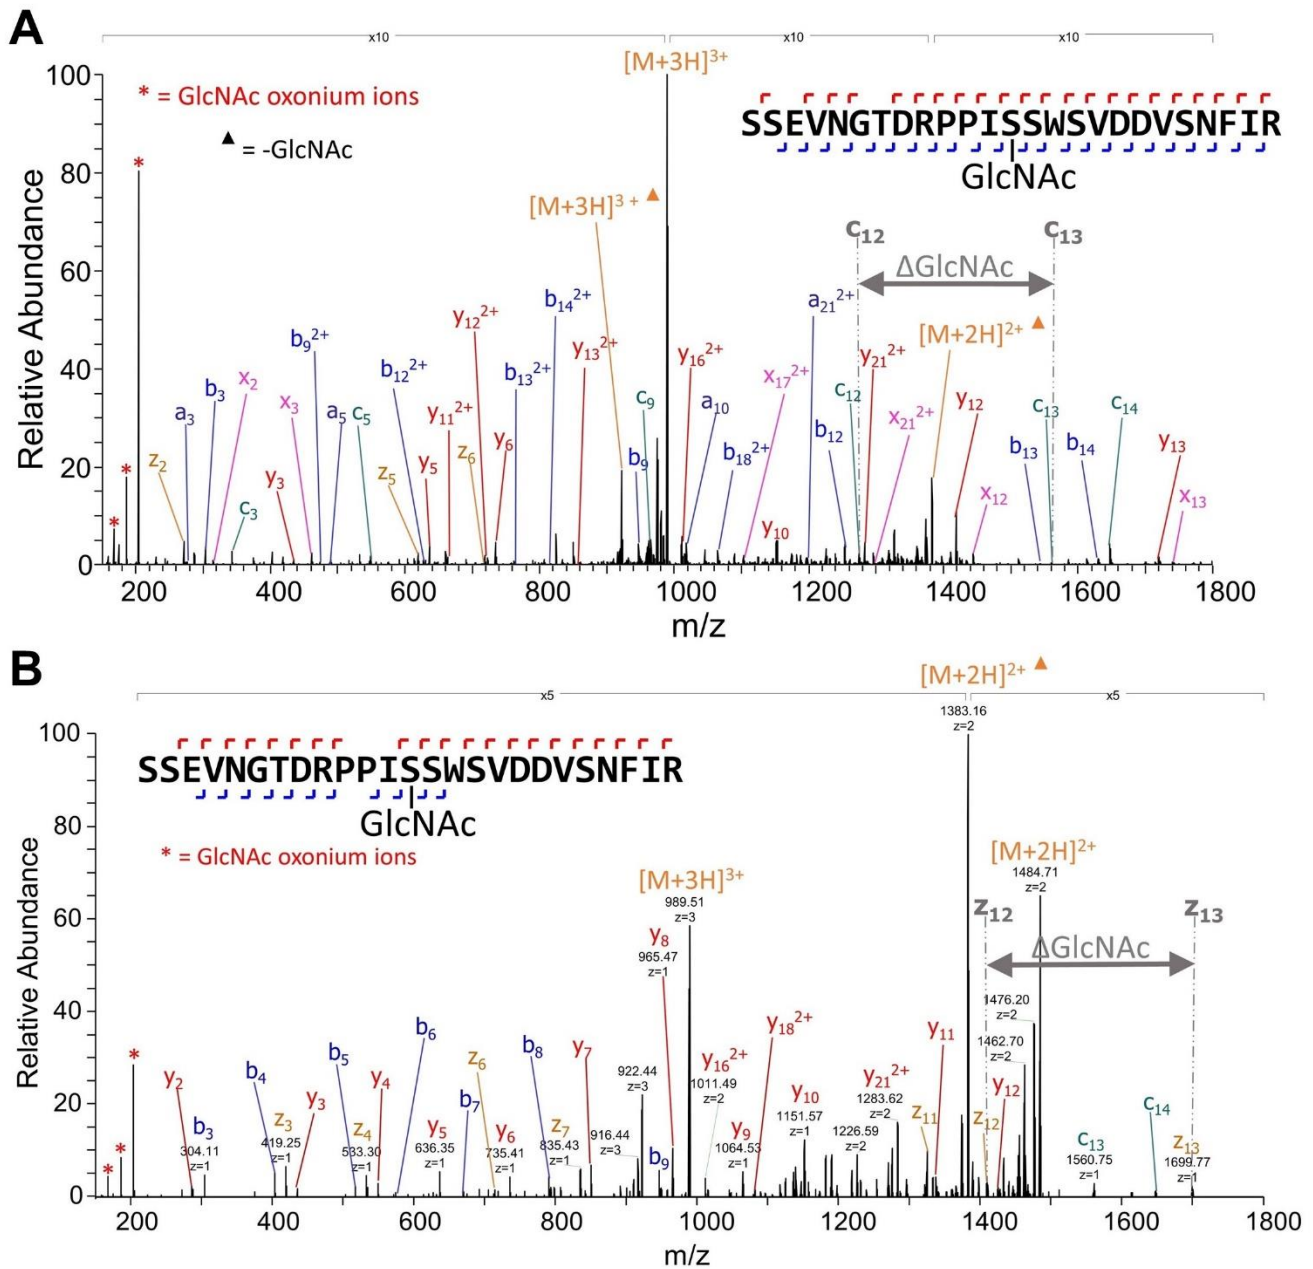

**Figure S20:** MS/MS comparison of SSEVNGTDRPPIS[+203]SWSVDDVSNFIR glycopeptide. The double-headed arrows and  $\Delta\text{GlcNAc}$  indicate the mass shifts representing loss of the O-GlcNAc-modified amino acid between fragment ions (labelled in grey at each end of the double headed arrow) that bracket the site of the modification. **(A)** HCD oxocarbenium ion-triggered 193 nm UVPD mass spectrum of glycosylated peptide SSEVNGTDRPPIS[+203]SWSVDDVSNFIR (3+,  $m/z$  989.80) from Ph1397-1589-O-GlcNAc tryptic digest using two pulses of 1.5 mJ. A sequence map is shown in the upper right, and the complete list of identified fragment ions is shown in **Table S24**. **(B)** HCD oxocarbenium ion-triggered EThcD mass spectrum of glycosylated peptide SSEVNGTDRPPIS[+203]SWSVDDVSNFIR (3+,  $m/z$  989.80) using 50 ms activation time and 25% supplemental energy. A sequence map is shown in the upper right, and the complete list of identified fragment ions is shown in **Table S27**.

## Section S3 Supplementary Tables

**Table S1:** Summary of O-GlcNAc-containing peptides identified using HCD-triggered-ETHcD for analysis of tryptic digests of O-GlcNAc-modified TAB1 and Ph proteins.

| Protein                 | Glycopeptide                                                                     | Charge state (+) | Detected Ion ( <i>m/z</i> ) | Peptide Mass (Da) | Mass error (ppm) | PEP 2D <sup>‡</sup> | Delta Mod Score | Sequence Coverage | Modified res <sup>§</sup> /known site? |
|-------------------------|----------------------------------------------------------------------------------|------------------|-----------------------------|-------------------|------------------|---------------------|-----------------|-------------------|----------------------------------------|
| TAB1                    | VYPVSVPYST <sup>†(g1)</sup> SAQSTSK                                              | 2                | 951.97                      | 1902.93           | 0.2              | 2.2e-14             | 901             | 100%              | S395 / Y <sup>26</sup>                 |
| TAB1                    | VYPVSVPYSS <sup>(g2)</sup> AQSTSK                                                | 2                | 951.97                      | 1902.93           | 0.9              | 7.5e-15             | 934             | 100%              | S396 / Y <sup>27</sup>                 |
| TAB1                    | VYPVSVPYSSAQSTSK <sup>(g3)</sup>                                                 | 2                | 951.97                      | 1902.93           | 2.1              | 7.4e-14             | 898             | 100%              | S399 / N                               |
| TAB1                    | LWSVDHGEQSVVT <sup>(g7)</sup> AP                                                 | 2                | 914.44                      | 1826.87           | 1.0              | 2.7e-8              | 650             | 93%               | T502 / N                               |
| Ph <sup>1397-1589</sup> | LSESPILGASTEVPMS <sup>(g2)</sup> LP<br>VQAAISAPLAMPLGSPLSV<br>ALPTLAPLSVVTSGAAPK | 5                | 118.24                      | 5937.19           | -0.3             | 2.9e-18             | 1039            | 72%               | S1457 / N                              |
| Ph <sup>1397-1589</sup> | SSEVNGTDRPPIS <sup>(g4)</sup> S<br>WSVDDVSNFIR                                   | 3                | 989.80                      | 2967.40           | 0.5              | 9.1e-15             | 773             | 88%               | S1511 / N                              |

<sup>†(g)</sup> denotes an identified O-GlcNAc modification site

<sup>‡</sup>Scoring criteria used for assessing quality of PTM site localization based previously established two-dimensional target decoy strategy (PEP 2D scores < 10<sup>-5</sup> & Delta Mod scores > 40)<sup>42</sup> using Byonic

<sup>§</sup>Modified amino acid position in the full-length protein.

\*Data are based on triplicate runs

**Table S2:** Complete list of ions generated by HCD of TAB1-O-GlcNAc peptide using an NCE of 25 to activate the TAB1-O-GlcNAc peptide (biotin-PVSV<sub>(g)</sub>PYS<sub>(g)</sub>SAQSTS, 2+, m/z 869.9). Fragment ions that undergo loss of water or ammonia are not listed in this table.

| Identified Ion               | Theoretical Mass | Observed Mass | Mass Error (ppm) |
|------------------------------|------------------|---------------|------------------|
| b <sub>2</sub>               | 422.2012         | 422.1991      | -5.0             |
| b <sub>3</sub>               | 509.2332         | 509.2316      | -3.1             |
| b <sub>4</sub>               | 608.3016         | 608.2999      | -2.9             |
| b <sub>5</sub>               | 705.3544         | 705.3493      | -7.2             |
| b <sub>7</sub> <sup>▲</sup>  | 955.4497         | 955.4484      | -1.4             |
| b <sub>8</sub> <sup>▲</sup>  | 1042.4818        | 1042.4820     | 0.2              |
| b <sub>10</sub> <sup>▲</sup> | 1241.5775        | 1241.5767     | -0.6             |
| b <sub>11</sub> <sup>▲</sup> | 1328.6095        | 1328.6096     | 0.1              |
| b <sub>12</sub> <sup>▲</sup> | 1429.6572        | 1429.6569     | -0.2             |
| Y <sub>2</sub>               | 206.0903         | 206.0904      | 0.7              |
| Y <sub>3</sub>               | 293.1223         | 293.1225      | 0.7              |
| Y <sub>4</sub>               | 421.1809         | 421.1813      | 1.1              |
| Y <sub>5</sub>               | 492.2180         | 492.2188      | 1.7              |
| Y <sub>6</sub>               | 579.2500         | 579.2508      | 1.3              |
| Y <sub>7</sub> <sup>▲</sup>  | 666.2821         | 666.2824      | 0.6              |
| Y <sub>9</sub> <sup>▲</sup>  | 926.3981         | 926.3987      | 0.6              |
| Y <sub>10</sub> <sup>▲</sup> | 1025.4666        | 1025.4693     | 2.7              |
| Y <sub>11</sub> <sup>▲</sup> | 1112.4986        | 1112.4999     | 1.1              |



**Table S3:** Complete list of ions generated by UVPD of TAB1-O-GlcNAc peptide using two pulse of 1.5 mJ laser energy to activate the TAB1-O-GlcNAc peptide (biotin-PVSV<sub>(g)</sub>PYS<sub>(g)</sub>SAQSTS, 2+, m/z 869.9). Fragment ions that undergo loss of water or ammonia are not listed in this table. Ions identified as a<sub>n</sub> + 1 have an extra hydrogen atom. The fragment ions that are critical for localization of GlcNAc sites are listed in blue font.

| Identified Ion               | Theoretical Mass | Observed Mass | Mass Error (ppm) |
|------------------------------|------------------|---------------|------------------|
| a <sub>1</sub> +1            | 296.1433         | 296.1429      | -1.2             |
| a <sub>2</sub>               | 394.2039         | 394.2041      | 0.5              |
| a <sub>3</sub>               | 481.2359         | 481.2363      | 0.9              |
| a <sub>4</sub> +1            | 581.3121         | 581.3121      | 0.0              |
| a <sub>5</sub> +1            | 678.3649         | 678.3655      | 0.9              |
| a <sub>6</sub> +1            | 841.4277         | 841.4225      | -6.2             |
| a <sub>7</sub>               | 1131.5391        | 1131.5462     | 6.3              |
| a <sub>8</sub>               | 1217.5638        | 1217.5636     | -0.1             |
| a <sub>9</sub> +1            | 1289.6088        | 1289.6039     | -3.8             |
| a <sub>10</sub>              | 1416.6595        | 1416.6621     | 1.8              |
| a <sub>10</sub> +1           | 1417.6674        | 1417.6662     | -0.8             |
| a <sub>11</sub>              | 1503.6916        | 1503.6816     | -6.6             |
| b <sub>1</sub>               | 323.1304         | 323.1306      | 0.6              |
| b <sub>2</sub>               | 422.1988         | 422.1989      | 0.4              |
| b <sub>3</sub>               | 509.2308         | 509.2313      | 0.9              |
| b <sub>4</sub>               | 608.2992         | 608.2996      | 0.7              |
| b <sub>5</sub>               | 705.3520         | 705.3528      | 1.2              |
| b <sub>7</sub>               | 1158.5267        | 1158.5297     | -1.1             |
| b <sub>8</sub>               | 1245.5587        | 1245.5574     | 2.5              |
| b <sub>9</sub>               | 1316.5959        | 1316.5992     | 2.5              |
| b <sub>10</sub>              | 1444.6545        | 1444.6537     | -0.5             |
| b <sub>10</sub> <sup>▲</sup> | 1241.5751        | 1241.5753     | 0.2              |
| b <sub>11</sub> <sup>▲</sup> | 1328.6071        | 1328.6081     | 0.7              |
| b <sub>12</sub>              | 1632.7341        | 1632.7298     | -2.6             |
| b <sub>12</sub> <sup>▲</sup> | 1429.6548        | 1429.6548     | 0.0              |
| c <sub>2</sub>               | 439.2251         | 439.2258      | 1.6              |
| c <sub>3</sub>               | 526.2571         | 526.2577      | 1.2              |
| c <sub>5</sub>               | 722.3783         | 722.3789      | 0.9              |
| c <sub>6</sub>               | 885.4416         | 885.4427      | 1.2              |
| c <sub>8</sub>               | 1262.5850        | 1262.5795     | -4.4             |
| c <sub>9</sub>               | 1333.6221        | 1333.6205     | -1.2             |
| x <sub>2</sub> +1            | 233.0774         | 233.0774      | 0.0              |
| x <sub>3</sub> +1            | 320.1094         | 320.1088      | -1.9             |
| x <sub>8</sub> +1            | 1059.4119        | 1059.4122     | 0.3              |
| x <sub>11</sub> +1           | 1342.5651        | 1342.5667     | 1.2              |
| x <sub>12</sub>              | 1440.6257        | 1440.6289     | 2.2              |
| Y <sub>3</sub>               | 293.1223         | 293.1224      | 0.2              |
| Y <sub>6</sub>               | 579.2500         | 579.2504      | 0.6              |
| Y <sub>8</sub>               | 1032.4248        | 1032.4228     | -1.9             |

|                 |           |           |      |
|-----------------|-----------|-----------|------|
| $Y_9$           | 1129.4775 | 1129.4771 | -0.4 |
| $Y_9^\Delta$    | 926.3981  | 926.3960  | -2.3 |
| $Y_{10}$        | 1228.5460 | 1228.5448 | -0.9 |
| $Y_{10}^\Delta$ | 1025.4666 | 1025.4644 | -2.1 |
| $Y_{11}$        | 1315.5780 | 1315.5792 | 0.9  |
| $Y_{11}^\Delta$ | 1112.4986 | 1112.4961 | -2.3 |
| $Z_{12}$        | 1398.6276 | 1398.6257 | -1.4 |
| $Z_5$           | 476.1992  | 476.1999  | 1.3  |
| $Z_6$           | 563.2313  | 563.2301  | -2.0 |
| $Z_7$           | 853.3427  | 853.3429  | 0.2  |

---

**Table S4:** Complete list of ions generated by EThcD of TAB1-O-GlcNAc peptide using 50 ms of ETD activation energy and 25% supplemental energy to activate the TAB1-O-GlcNAc peptide (biotin-PVSVYPYS<sub>(g)</sub>SAQSTS, 2+, m/z 869.9). The fragment ions that are critical for localization of GlcNAc sites are listed in blue font.

| Identified Ion               | Theoretical Mass | Observed Mass | Mass Error (ppm) |
|------------------------------|------------------|---------------|------------------|
| b <sub>2</sub>               | 422.1988         | 422.1986      | -0.5             |
| b <sub>3</sub>               | 509.2308         | 509.2305      | -0.5             |
| b <sub>6</sub>               | 868.4153         | 868.4161      | 0.9              |
| b <sub>10</sub> <sup>▲</sup> | 1241.5751        | 1241.5751     | 0.0              |
| b <sub>11</sub> <sup>▲</sup> | 1328.6071        | 1328.6077     | 0.5              |
| b <sub>12</sub>              | 1632.7342        | 1632.7404     | 3.8              |
| b <sub>12</sub> <sup>▲</sup> | 1429.6548        | 1429.6551     | 0.2              |
| c <sub>5</sub>               | 722.3783         | 722.3790      | 1.1              |
| c <sub>6</sub>               | 885.4416         | 885.4409      | -0.8             |
| c <sub>7</sub>               | 1175.5530        | 1175.5516     | -1.2             |
| c <sub>7</sub> <sup>▲</sup>  | 972.4736         | 972.4750      | 1.4              |
| c <sub>8</sub>               | 1262.5851        | 1262.5861     | 0.8              |
| c <sub>8</sub> <sup>▲</sup>  | 1059.5057        | 1059.5067     | 1.0              |
| c <sub>9</sub>               | 1333.6222        | 1333.6216     | -0.4             |
| c <sub>10</sub>              | 1461.6808        | 1461.6815     | 0.5              |
| c <sub>10</sub> <sup>▲</sup> | 1258.6014        | 1258.6017     | 0.3              |
| c <sub>11</sub>              | 1548.7128        | 1548.7151     | 1.5              |
| c <sub>11</sub> <sup>▲</sup> | 1345.6334        | 1345.6342     | 0.6              |
| c <sub>12</sub>              | 1649.7605        | 1649.7611     | 0.4              |
| c <sub>12</sub> <sup>▲</sup> | 1446.6811        | 1446.6815     | 0.3              |
| y <sub>3</sub>               | 293.1223         | 293.1223      | 0.0              |
| y <sub>6</sub>               | 579.2500         | 579.2495      | -0.9             |
| y <sub>9</sub>               | 1129.4775        | 1129.4775     | 0.0              |
| y <sub>9</sub> <sup>▲</sup>  | 926.3981         | 926.3979      | -0.2             |
| y <sub>10</sub>              | 1228.5460        | 1228.5468     | 0.7              |
| y <sub>11</sub>              | 1315.5780        | 1315.5818     | 2.9              |
| y <sub>11</sub> <sup>▲</sup> | 1112.4986        | 1112.4983     | -0.3             |
| z <sub>10</sub>              | 1212.5272        | 1212.5284     | 1.0              |
| z <sub>10</sub> <sup>▲</sup> | 1009.4478        | 1009.4486     | 0.8              |
| z <sub>11</sub>              | 1299.5592        | 1299.5612     | 1.5              |
| z <sub>12</sub>              | 1398.6276        | 1398.6289     | 0.9              |
| z <sub>12</sub> <sup>▲</sup> | 1195.5482        | 1195.5417     | -5.5             |

**Table S5:** Complete list of ions generated by UVPD of HCF-OGlcNAc peptide using two pulse of 1.5 mJ laser energy to activate the HCF-OGlcNAc peptide (YVRVCSNPPCS<sub>(g)</sub>THETGTTNTATTATS, 3+, m/z 967.76). The fragment ions that are critical for localization of GlcNAc sites are listed in blue font.

| Identified Ion                | Theoretical Mass | Observed Mass | Mass Error (ppm) |
|-------------------------------|------------------|---------------|------------------|
| a <sub>2</sub>                | 234.1368         | 234.1373      | 1.9              |
| a <sub>3</sub> +1             | 391.2458         | 391.2456      | -0.4             |
| a <sub>4</sub>                | 489.3063         | 489.3066      | 0.6              |
| a <sub>4</sub> +1             | 490.3142         | 490.3129      | -2.7             |
| a <sub>6</sub> +1             | 680.3554         | 680.3521      | -4.9             |
| a <sub>7</sub>                | 793.3905         | 793.3961      | 7.1              |
| a <sub>10</sub> +1            | 1091.5052        | 1091.4982     | -6.3             |
| a <sub>11</sub> +1            | 1381.6245        | 1381.6145     | -7.2             |
| a <sub>12</sub>               | 1481.6643        | 1481.6545     | -6.6             |
| a <sub>18</sub> +1            | 2108.9381        | 2108.9274     | -5.1             |
| a <sub>19</sub>               | 2221.9732        | 2221.9703     | -1.3             |
| a <sub>23</sub> +1            | 2597.1612        | 2597.1415     | -7.6             |
| a <sub>24</sub>               | 2667.1905        | 2667.1824     | -3.0             |
| b <sub>2</sub>                | 262.1317         | 262.1323      | 2.3              |
| b <sub>3</sub>                | 418.2329         | 418.2335      | 1.6              |
| b <sub>4</sub>                | 517.3013         | 517.3021      | 1.6              |
| b <sub>7</sub>                | 821.3854         | 821.3896      | 5.1              |
| b <sub>8</sub>                | 918.4382         | 918.4394      | 1.3              |
| b <sub>10</sub>               | 1118.5001        | 1118.4894     | -9.6             |
| b <sub>13</sub> <sup>▲</sup>  | 1443.6387        | 1443.6389     | 0.1              |
| b <sub>14</sub> <sup>▲</sup>  | 1572.6813        | 1572.6906     | 5.9              |
| b <sub>15</sub> <sup>▲</sup>  | 1673.7290        | 1673.7280     | -0.6             |
| b <sub>17</sub>               | 2034.8776        | 2034.8970     | 9.5              |
| b <sub>24</sub> <sup>▲</sup>  | 2492.1060        | 2492.1015     | -1.8             |
| b <sub>25</sub>               | 2796.2331        | 2796.2333     | 0.1              |
| b <sub>25</sub> <sup>▲</sup>  | 2593.1537        | 2593.1421     | -4.5             |
| c <sub>4</sub>                | 534.3276         | 534.3288      | 2.3              |
| c <sub>19</sub>               | 2266.9945        | 2266.9772     | -7.6             |
| x <sub>12</sub>               | 1151.4942        | 1151.5037     | 8.2              |
| y <sub>3</sub>                | 277.1274         | 277.1278      | 1.7              |
| y <sub>4</sub>                | 378.1751         | 378.1758      | 1.8              |
| y <sub>5</sub>                | 479.2227         | 479.2240      | 2.6              |
| y <sub>6</sub>                | 550.2599         | 550.2612      | 2.5              |
| y <sub>8</sub>                | 765.3505         | 765.3534      | 3.9              |
| y <sub>11</sub>               | 1024.4673        | 1024.4733     | 5.9              |
| y <sub>14</sub>               | 1391.6165        | 1391.6204     | 2.8              |
| y <sub>15</sub>               | 1492.6641        | 1492.6729     | 5.8              |
| y <sub>16</sub>               | 1782.7756        | 1782.7713     | -2.4             |
| y <sub>20</sub>               | 2193.9332        | 2193.9411     | 3.6              |
| y <sub>21</sub>               | 2280.9652        | 2280.9743     | 4.0              |
| y <sub>24</sub> <sup>-1</sup> | 2638.1361        | 2638.1440     | 3.0              |
| z <sub>9</sub>                | 850.3794         | 850.3761      | -3.9             |
| z <sub>18</sub>               | 1966.8188        | 1966.8319     | 6.7              |
| z <sub>24</sub>               | 2623.1252        | 2623.1344     | 3.5              |

**Table S6:** Complete list of ions generated by UVPD of CKII-OGlcNAc peptide using two pulse of 1.5 mJ laser energy to activate the CKII-OGlcNAc peptide (YPGGSTPVS<sub>(g)</sub>SANMM, 2+, m/z 801.3). The fragment ions that are critical for localization of GlcNAc sites are listed in blue font.

| Identified Ion               | Theoretical Mass | Observed Mass | Mass Error (ppm) |
|------------------------------|------------------|---------------|------------------|
| a <sub>2</sub>               | 232.1212         | 232.1216      | 2.0              |
| a <sub>5</sub>               | 433.1961         | 433.1975      | 3.1              |
| a <sub>6</sub>               | 534.2438         | 534.2439      | 0.2              |
| a <sub>9</sub>               | 1020.4764        | 1020.4834     | 6.8              |
| a <sub>13</sub> +1           | 1424.6368        | 1424.6390     | 1.5              |
| a <sub>4</sub> +1            | 347.1719         | 347.1726      | 2.0              |
| a <sub>7</sub> +1            | 632.3044         | 632.3035      | -1.4             |
| a <sub>8</sub> +1            | 731.3728         | 731.3723      | -0.7             |
| a <sub>10</sub>              | 1107.5084        | 1107.5179     | 8.5              |
| a <sub>11</sub>              | 1178.5455        | 1178.5482     | 2.2              |
| b <sub>4</sub>               | 374.1590         | 374.1596      | 1.6              |
| b <sub>5</sub>               | 461.1910         | 461.1922      | 2.6              |
| b <sub>6</sub>               | 562.2387         | 562.2402      | 2.7              |
| b <sub>8</sub>               | 758.3599         | 758.3613      | 1.9              |
| b <sub>9</sub>               | 1048.4713        | 1048.4766     | 5.0              |
| b <sub>9</sub> <sup>▲</sup>  | 845.3919         | 845.3925      | 0.7              |
| b <sub>10</sub>              | 1135.5034        | 1135.5096     | 5.5              |
| b <sub>10</sub> <sup>▲</sup> | 932.4240         | 932.4240      | 0.0              |
| b <sub>11</sub>              | 1206.5405        | 1206.5422     | 1.5              |
| b <sub>11</sub> <sup>▲</sup> | 1003.4611        | 1003.4625     | 1.5              |
| b <sub>12</sub>              | 1320.5834        | 1320.5873     | 2.9              |
| b <sub>12</sub> <sup>▲</sup> | 1117.5040        | 1117.5036     | -0.3             |
| b <sub>13</sub>              | 1451.6239        | 1451.6267     | 2.0              |
| b <sub>13</sub> <sup>▲</sup> | 1248.5445        | 1248.5465     | 1.6              |
| c <sub>2</sub>               | 277.1424         | 277.1432      | 2.8              |
| c <sub>3</sub>               | 334.1639         | 334.1647      | 2.5              |
| c <sub>4</sub>               | 391.1853         | 391.1858      | 1.3              |
| c <sub>7</sub>               | 676.3178         | 676.3230      | 7.7              |
| c <sub>8</sub>               | 775.3862         | 775.3882      | 2.6              |
| c <sub>10</sub>              | 1152.5297        | 1152.5307     | 0.9              |
| c <sub>11</sub>              | 1223.5668        | 1223.5725     | 4.7              |
| c <sub>12</sub> <sup>▲</sup> | 1134.5303        | 1134.5253     | -4.4             |
| c <sub>13</sub> <sup>▲</sup> | 1265.5708        | 1265.5671     | -2.9             |
| x <sub>6</sub> +1            | 869.3021         | 869.3017      | -0.6             |
| x <sub>7</sub> +1            | 968.3705         | 968.3709      | 0.4              |
| x <sub>8</sub> +1            | 1065.4233        | 1065.4315     | 7.7              |
| y <sub>1</sub>               | 149.0511         | 149.0515      | 3.0              |
| y <sub>2</sub>               | 280.0915         | 280.0921      | 1.8              |
| y <sub>3</sub>               | 394.1345         | 394.1353      | 2.0              |
| y <sub>4</sub>               | 465.1716         | 465.1726      | 2.3              |

|                 |           |           |      |
|-----------------|-----------|-----------|------|
| $y_5$           | 552.2036  | 552.2051  | 2.7  |
| $y_6$           | 842.3150  | 842.3166  | 1.9  |
| $y_6^\Delta$    | 639.2356  | 639.2353  | -0.5 |
| $y_8$           | 1038.4362 | 1038.4373 | 1.0  |
| $y_8^\Delta$    | 835.3568  | 835.3558  | -1.2 |
| $y_9^\Delta$    | 936.4045  | 936.4057  | 1.3  |
| $y_{12}^\Delta$ | 1137.4794 | 1137.4786 | -0.8 |
| $y_{13}^\Delta$ | 1234.5322 | 1234.5319 | -0.2 |
| $y_{10}$        | 1226.5159 | 1226.5163 | 0.3  |
| $y_{11}$        | 1283.5374 | 1283.5411 | 2.9  |
| $y_{11}^{-1}$   | 1282.5296 | 1282.5279 | -1.3 |
| $y_{12}$        | 1340.5588 | 1340.5583 | -0.4 |
| $y_{13}$        | 1437.6116 | 1437.6136 | 1.4  |
| $z_9$           | 1123.4651 | 1123.4629 | -2.0 |

---

**Table S7:** Complete list of ions generated by EThcD of HCF-OGlcNAc peptide using 50 ms of ETD activation energy and 25% supplemental energy to activate the HCF-OGlcNAc peptide (YVRVCSNPPCS<sub>(g)</sub>THETGTTNTATTATS, 3+, m/z 967.76). The fragment ions that are critical for localization of GlcNAc sites are listed in blue font.

| Identified Ions              | Theoretical Mass | Observed Mass | Mass Error (ppm) |
|------------------------------|------------------|---------------|------------------|
| b <sub>21</sub> <sup>▲</sup> | 2218.9805        | 2218.9735     | -3.2             |
| b <sub>24</sub>              | 2695.1760        | 2695.1807     | 1.7              |
| b <sub>24</sub> <sup>▲</sup> | 2492.1060        | 2492.1055     | -0.2             |
| b <sub>25</sub> <sup>▲</sup> | 2593.1537        | 2593.1521     | -0.6             |
| c <sub>4</sub>               | 534.3276         | 534.3276      | 0.2              |
| c <sub>19</sub>              | 2266.9850        | 2266.9900     | 2.1              |
| Y <sub>2</sub>               | 206.0903         | 206.0902      | -0.2             |
| Y <sub>3</sub>               | 277.1274         | 277.1274      | 0.1              |
| Y <sub>4</sub>               | 378.1751         | 378.1748      | -0.6             |
| Y <sub>5</sub>               | 479.2227         | 479.2227      | 0.0              |
| Y <sub>6</sub>               | 550.2599         | 550.2597      | -0.3             |
| Y <sub>8</sub>               | 765.3505         | 765.3491      | -1.7             |
| Y <sub>11</sub>              | 1024.4670        | 1024.4670     | -0.3             |
| Y <sub>13</sub>              | 1254.5580        | 1254.5550     | -2.4             |
| Y <sub>14</sub>              | 1391.6170        | 1391.6180     | 0.8              |
| Y <sub>15</sub>              | 1492.6640        | 1492.6670     | 1.6              |
| Y <sub>24</sub>              | 2639.1350        | 2639.1600     | 9.5              |
| Z <sub>8</sub>               | 749.3317         | 749.3317      | 0.0              |
| Z <sub>14</sub>              | 1375.5980        | 1375.6030     | 3.6              |
| Z <sub>15</sub>              | 1476.6450        | 1476.6440     | -1.2             |

**Table S8:** Complete list of ions generated by EThcD of CKII-OGlcNAc peptide using 50 ms of ETD activation energy and 25% supplemental energy to activate the CKII-OGlcNAc peptide (YPGGSTPVS<sub>(g)</sub>SANMM, 2+, m/z 801.3). The fragment ions that are critical for localization of GlcNAc sites are listed in blue font.

| Identified Ion               | Theoretical Mass | Observed Mass | Mass Error (ppm) |
|------------------------------|------------------|---------------|------------------|
| b <sub>4</sub>               | 374.1590         | 374.1585      | -1.2             |
| b <sub>5</sub>               | 461.1910         | 461.1906      | -0.9             |
| b <sub>6</sub>               | 562.2387         | 562.2385      | -0.4             |
| b <sub>8</sub>               | 758.3599         | 758.3597      | -0.2             |
| b <sub>9</sub>               | 1048.4713        | 1048.4656     | -5.4             |
| b <sub>9</sub> <sup>▲</sup>  | 845.3919         | 845.3925      | 0.7              |
| b <sub>10</sub> <sup>▲</sup> | 932.4240         | 932.4240      | 0.0              |
| b <sub>11</sub> <sup>▲</sup> | 1003.4611        | 1003.4625     | 1.5              |
| b <sub>12</sub> <sup>▲</sup> | 1117.5040        | 1117.5036     | -0.3             |
| b <sub>13</sub> <sup>▲</sup> | 1248.5445        | 1248.5465     | 1.6              |
| c <sub>5</sub>               | 478.2173         | 478.2170      | -0.7             |
| c <sub>7</sub>               | 676.3178         | 676.3183      | 0.8              |
| c <sub>8</sub>               | 775.3862         | 775.3846      | -2.1             |
| c <sub>10</sub>              | 1152.5297        | 1152.5285     | -1.0             |
| c <sub>10</sub> <sup>▲</sup> | 949.4503         | 949.4444      | -6.1             |
| c <sub>11</sub> <sup>▲</sup> | 1020.4874        | 1020.4902     | 2.8              |
| c <sub>12</sub>              | 1337.6097        | 1337.6080     | -1.3             |
| c <sub>12</sub> <sup>▲</sup> | 1134.5303        | 1134.5253     | -4.4             |
| c <sub>13</sub>              | 1468.6502        | 1468.6479     | -1.5             |
| c <sub>13</sub> <sup>▲</sup> | 1265.5708        | 1265.5671     | -2.9             |
| Y <sub>2</sub>               | 280.0915         | 280.0915      | -0.1             |
| Y <sub>8</sub>               | 1038.4362        | 1038.4355     | -0.7             |
| Y <sub>8</sub> <sup>▲</sup>  | 835.3568         | 835.3558      | -1.2             |
| Y <sub>9</sub> <sup>▲</sup>  | 936.4045         | 936.4057      | 1.3              |
| Y <sub>12</sub> <sup>▲</sup> | 1137.4794        | 1137.4786     | -0.8             |
| Y <sub>13</sub> <sup>▲</sup> | 1234.5322        | 1234.5319     | -0.2             |
| Z <sub>11</sub>              | 1267.5186        | 1267.5296     | 8.6              |
| Z <sub>12</sub>              | 1324.5401        | 1324.5485     | 6.4              |



**Table S9:** Complete list of ions generated by UVPD of a tryptic peptide from TAB1 glycoprotein using two pulse of 1.5 mJ laser energy to activate the peptide (VYPVSVPYSS<sub>(g)</sub>AQSTSK, 2+, m/z 951.97). The fragment ions that are critical for localization of GlcNAc sites are listed in blue font.

| Identified Ions | Theoretical m/z | Observed m/z | Mass Error (ppm) |
|-----------------|-----------------|--------------|------------------|
| a <sub>2</sub>  | 235.1441        | 235.1443     | 0.9              |
| a <sub>3</sub>  | 332.1969        | 332.1974     | 1.5              |
| a <sub>4</sub>  | 431.2653        | 431.2657     | 0.9              |
| a <sub>5</sub>  | 518.2973        | 518.2982     | 1.7              |
| a <sub>6</sub>  | 617.3657        | 617.3668     | 1.8              |
| a <sub>7</sub>  | 714.4185        | 714.4211     | 3.6              |
| a <sub>8</sub>  | 877.4818        | 877.4841     | 2.6              |
| a <sub>9</sub>  | 964.5138        | 964.5183     | 4.7              |
| a <sub>10</sub> | 1254.6252       | 1254.6274    | 1.8              |
| a <sub>11</sub> | 1325.6623       | 1325.6588    | -2.6             |
| a <sub>12</sub> | 1453.7209       | 1453.7260    | 3.5              |
| a <sub>13</sub> | 1540.7530       | 1540.7603    | 4.7              |
| a <sub>15</sub> | 1728.8327       | 1728.8295    | -1.9             |
| b <sub>2</sub>  | 263.1390        | 263.1393     | 1.1              |
| b <sub>3</sub>  | 360.1918        | 360.1922     | 1.1              |
| b <sub>4</sub>  | 459.2602        | 459.2608     | 1.3              |
| b <sub>5</sub>  | 546.2922        | 546.2932     | 1.8              |
| b <sub>6</sub>  | 645.3606        | 645.3617     | 1.7              |
| b <sub>7</sub>  | 742.4134        | 742.4123     | -1.5             |
| b <sub>8</sub>  | 905.4767        | 905.4822     | 6.1              |
| b <sub>9</sub>  | 992.5087        | 992.5151     | 6.4              |
| b <sub>11</sub> | 1353.6573       | 1353.6592    | 1.4              |
| b <sub>14</sub> | 1669.7955       | 1669.7964    | 0.5              |
| c <sub>3</sub>  | 377.2183        | 377.2187     | 1.1              |
| c <sub>4</sub>  | 476.2867        | 476.2873     | 1.3              |
| c <sub>5</sub>  | 563.3188        | 563.3196     | 1.4              |
| c <sub>7</sub>  | 759.4399        | 759.4406     | 0.9              |
| c <sub>8</sub>  | 922.5033        | 922.5055     | 2.4              |
| c <sub>13</sub> | 1585.7744       | 1585.7734    | -0.6             |
| c <sub>14</sub> | 1686.8221       | 1686.8252    | 1.8              |
| c <sub>15</sub> | 1773.8541       | 1773.8438    | -5.8             |
| x <sub>1</sub>  | 173.0921        | 173.0924     | 1.7              |
| x <sub>2</sub>  | 260.1241        | 260.1245     | 1.5              |
| x <sub>3</sub>  | 361.1718        | 361.1726     | 2.2              |
| x <sub>4</sub>  | 448.2038        | 448.2044     | 1.3              |
| x <sub>5</sub>  | 576.2624        | 576.2640     | 2.8              |
| x <sub>6</sub>  | 647.2995        | 647.3011     | 2.5              |
| x <sub>7</sub>  | 937.4109        | 937.4147     | 4.1              |
| x <sub>8</sub>  | 1024.4429       | 1024.4454    | 2.4              |
| x <sub>9</sub>  | 1187.5063       | 1187.5084    | 1.8              |
| x <sub>10</sub> | 1284.5590       | 1284.5569    | -1.6             |

|                                |           |           |      |
|--------------------------------|-----------|-----------|------|
| X <sub>11</sub>                | 1383.6274 | 1383.6179 | -6.9 |
| X <sub>12</sub>                | 1470.6595 | 1470.6633 | 2.6  |
| X <sub>13</sub>                | 1569.7279 | 1569.7321 | 2.7  |
| X <sub>14</sub>                | 1666.7806 | 1666.7867 | 3.7  |
| Y <sub>2</sub>                 | 234.1448  | 234.1451  | 1.3  |
| Y <sub>3</sub>                 | 335.1925  | 335.1928  | 0.9  |
| Y <sub>4</sub>                 | 422.2245  | 422.2250  | 1.2  |
| Y <sub>5</sub>                 | 550.2831  | 550.2840  | 1.6  |
| Y <sub>6</sub>                 | 621.3202  | 621.3217  | 2.4  |
| Y <sub>7</sub>                 | 911.4316  | 911.4340  | 2.6  |
| Y <sub>7</sub> <sup>▲</sup>    | 708.3523  | 708.3538  | 2.1  |
| Y <sub>8</sub>                 | 998.4637  | 998.4648  | 1.1  |
| Y <sub>8</sub> <sup>▲</sup>    | 795.3843  | 795.3853  | 1.3  |
| Y <sub>9</sub>                 | 1161.5270 | 1161.5309 | 3.4  |
| Y <sub>10</sub>                | 1258.5798 | 1258.5823 | 2.0  |
| Y <sub>10</sub> <sup>▲</sup>   | 1055.5004 | 1055.5005 | 0.1  |
| Y <sub>11</sub>                | 1357.6482 | 1357.6516 | 2.5  |
| Y <sub>11</sub> <sup>▲</sup>   | 1154.5688 | 1154.5697 | 0.8  |
| Y <sub>12</sub>                | 1444.6802 | 1444.6840 | 2.6  |
| Y <sub>12</sub> <sup>▲</sup>   | 1241.6008 | 1241.6022 | 1.1  |
| Y <sub>13</sub>                | 1543.7486 | 1543.7529 | 2.8  |
| Y <sub>13</sub> <sup>▲</sup>   | 1340.6692 | 1340.6719 | 2.0  |
| Y <sub>14</sub>                | 1640.8014 | 1640.8013 | -0.1 |
| Y <sub>14</sub> <sup>▲</sup>   | 1437.7220 | 1437.7240 | 1.4  |
| Y <sub>15</sub>                | 902.4360  | 902.4366  | 0.7  |
| Y <sub>10</sub> <sup>2+▲</sup> | 528.2538  | 528.2540  | 0.4  |
| Y <sub>14</sub> <sup>2+▲</sup> | 719.3646  | 719.3646  | 0.0  |
| Z <sub>2</sub>                 | 218.1261  | 218.1263  | 0.9  |
| Z <sub>3</sub>                 | 319.1738  | 319.1743  | 1.6  |
| Z <sub>4</sub>                 | 406.2058  | 406.2063  | 1.2  |
| Z <sub>5</sub>                 | 534.2644  | 534.2652  | 1.5  |
| Z <sub>6</sub>                 | 605.3015  | 605.3024  | 1.5  |
| Z <sub>7</sub>                 | 895.4129  | 895.4158  | 3.2  |
| Z <sub>8</sub>                 | 982.4449  | 982.4473  | 2.4  |
| Z <sub>9</sub>                 | 1145.5083 | 1145.5094 | 1.0  |
| Z <sub>12</sub>                | 1428.6615 | 1428.6638 | 1.6  |
| Z <sub>13</sub>                | 1527.7299 | 1527.7352 | 3.5  |
| Z <sub>14</sub>                | 1624.7826 | 1624.7925 | 6.1  |
| Z <sub>15</sub>                | 1787.8460 | 1787.8484 | 1.3  |

**Table S10:** Complete list of ions generated by UVPD of a tryptic peptide from TAB1 glycoprotein using two pulse of 1.5 mJ laser energy to activate the peptide (VYPVSVYPYS<sub>(g)</sub>SAQSTSK, 2+, m/z 951.97). The fragment ions that are critical for localization of GlcNAc sites are listed in blue font.

| Identified Ions | Theoretical m/z | Observed m/z | Mass Error (ppm) |
|-----------------|-----------------|--------------|------------------|
| a <sub>2</sub>  | 235.1441        | 235.1445     | 1.7              |
| a <sub>3</sub>  | 332.1969        | 332.1974     | 1.5              |
| a <sub>4</sub>  | 431.2653        | 431.2659     | 1.4              |
| a <sub>5</sub>  | 518.2973        | 518.2984     | 2.1              |
| a <sub>6</sub>  | 617.3657        | 617.3671     | 2.3              |
| a <sub>7</sub>  | 714.4185        | 714.4208     | 3.2              |
| a <sub>8</sub>  | 877.4818        | 877.4847     | 3.3              |
| a <sub>9</sub>  | 1167.5932       | 1167.6032    | 8.6              |
| a <sub>10</sub> | 1254.6252       | 1254.6211    | -3.3             |
| a <sub>11</sub> | 1325.6623       | 1325.6631    | 0.6              |
| a <sub>12</sub> | 1453.7209       | 1453.7235    | 1.8              |
| a <sub>13</sub> | 1540.7530       | 1540.7572    | 2.7              |
| a <sub>15</sub> | 1728.8327       | 1728.8345    | 1.0              |
| b <sub>2</sub>  | 263.1390        | 263.1395     | 1.9              |
| b <sub>3</sub>  | 360.1918        | 360.1923     | 1.4              |
| b <sub>4</sub>  | 459.2602        | 459.2610     | 1.7              |
| b <sub>5</sub>  | 546.2922        | 546.2933     | 2.0              |
| b <sub>6</sub>  | 645.3606        | 645.3619     | 2.0              |
| b <sub>7</sub>  | 742.4134        | 742.4135     | 0.1              |
| b <sub>8</sub>  | 905.4767        | 905.4821     | 6.0              |
| b <sub>9</sub>  | 1195.5881       | 1195.5811    | -5.9             |
| b <sub>10</sub> | 1282.6201       | 1282.6222    | 1.6              |
| b <sub>11</sub> | 1353.6573       | 1353.6619    | 3.4              |
| b <sub>12</sub> | 1481.7158       | 1481.7180    | 1.5              |
| b <sub>14</sub> | 1669.7955       | 1669.8009    | 3.2              |
| c <sub>3</sub>  | 377.2183        | 377.2190     | 1.9              |
| c <sub>4</sub>  | 476.2867        | 476.2876     | 1.9              |
| c <sub>5</sub>  | 563.3188        | 563.3201     | 2.3              |
| c <sub>7</sub>  | 759.4399        | 759.4416     | 2.2              |
| c <sub>8</sub>  | 922.5033        | 922.5061     | 3.0              |
| c <sub>11</sub> | 1370.6838       | 1370.6893    | 4.0              |
| c <sub>13</sub> | 1585.7744       | 1585.7745    | 0.1              |
| c <sub>14</sub> | 1686.8221       | 1686.8324    | 6.1              |
| c <sub>15</sub> | 1773.8541       | 1773.8557    | 0.9              |
| x <sub>1</sub>  | 173.0921        | 173.0925     | 2.3              |
| x <sub>2</sub>  | 260.1241        | 260.1245     | 1.5              |
| x <sub>3</sub>  | 361.1718        | 361.1729     | 3.0              |
| x <sub>4</sub>  | 448.2038        | 448.2046     | 1.8              |
| x <sub>5</sub>  | 576.2624        | 576.2635     | 1.9              |
| x <sub>6</sub>  | 647.2995        | 647.3016     | 3.2              |
| x <sub>7</sub>  | 734.3315        | 734.3312     | -0.4             |

|                             |           |           |      |
|-----------------------------|-----------|-----------|------|
| $x_8$                       | 1024.4429 | 1024.4448 | 1.9  |
| $x_9$                       | 1187.5063 | 1187.5099 | 3.0  |
| $x_{10}$                    | 1284.5590 | 1284.5594 | 0.3  |
| $x_{11}$                    | 1383.6274 | 1383.6245 | -2.1 |
| $x_{12}$                    | 1470.6595 | 1470.6643 | 3.3  |
| $x_{13}$                    | 1569.7279 | 1569.7332 | 3.4  |
| $x_{14}$                    | 1666.7806 | 1666.7876 | 4.2  |
| $x_{15}$                    | 902.4360  | 902.4374  | 1.6  |
| $y_2$                       | 234.1448  | 234.1452  | 1.7  |
| $y_3$                       | 335.1925  | 335.1930  | 1.5  |
| $y_4$                       | 422.2245  | 422.2252  | 1.7  |
| $y_5$                       | 550.2831  | 550.2843  | 2.2  |
| $y_6$                       | 621.3202  | 621.3221  | 3.1  |
| $y_7$                       | 708.3523  | 708.3540  | 2.4  |
| $y_8$                       | 998.4637  | 998.4652  | 1.5  |
| $y_8^\blacktriangle$        | 795.3843  | 795.3853  | 1.3  |
| $y_9$                       | 1161.5270 | 1161.5306 | 3.1  |
| $y_9^\blacktriangle$        | 958.4476  | 958.4480  | 0.4  |
| $y_{10}$                    | 1258.5798 | 1258.5830 | 2.5  |
| $y_{11}$                    | 1357.6482 | 1357.6523 | 3.0  |
| $y_{11}^\blacktriangle$     | 1154.5688 | 1154.5697 | 0.8  |
| $y_{12}$                    | 1444.6802 | 1444.6848 | 3.2  |
| $y_{12}^\blacktriangle$     | 1241.6008 | 1241.6022 | 1.1  |
| $y_{13}$                    | 1543.7486 | 1543.7521 | 2.3  |
| $y_{13}^\blacktriangle$     | 1340.6692 | 1340.6719 | 2.0  |
| $y_{14}$                    | 1640.8014 | 1640.8027 | 0.8  |
| $y_{14}^\blacktriangle$     | 1437.7220 | 1437.7240 | 1.4  |
| $y_{15}^\blacktriangle$     | 1600.7853 | 1600.7859 | 0.4  |
| $y_{10}^{2+\blacktriangle}$ | 528.2538  | 528.2539  | 0.2  |
| $y_{14}^{2+\blacktriangle}$ | 719.3646  | 719.3642  | -0.6 |
| $y_{15}^{2+\blacktriangle}$ | 800.8963  | 800.8975  | 1.5  |
| $z_2$                       | 218.1261  | 218.1265  | 1.8  |
| $z_3$                       | 319.1738  | 319.1744  | 1.9  |
| $z_4$                       | 406.2058  | 406.2065  | 1.7  |
| $z_5$                       | 534.2644  | 534.2654  | 1.9  |
| $z_6$                       | 605.3015  | 605.3026  | 1.8  |
| $z_7$                       | 692.3335  | 692.3334  | -0.1 |
| $z_8$                       | 982.4449  | 982.4475  | 2.6  |
| $z_9$                       | 1145.5083 | 1145.5103 | 1.7  |
| $z_{12}$                    | 1428.6615 | 1428.6649 | 2.4  |
| $z_{13}$                    | 1527.7299 | 1527.7357 | 3.8  |
| $z_{14}$                    | 1624.7826 | 1624.7918 | 5.7  |
| $z_{15}$                    | 1787.8460 | 1787.8507 | 2.6  |

**Table S11:** Complete list of ions generated by UVPD of a tryptic peptide from TAB1 glycoprotein using two pulse of 1.5 mJ laser energy to activate the peptide (VYPVSVPYSSAQS<sub>(g)</sub>TSK, 2+, m/z 951.97). The fragment ions that are critical for localization of GlcNAc sites are listed in blue font.

| Identified Ions | Theoretical m/z | Observed m/z | Mass Error (ppm) |
|-----------------|-----------------|--------------|------------------|
| a <sub>2</sub>  | 235.1441        | 235.1445     | 1.7              |
| a <sub>3</sub>  | 332.1969        | 332.1975     | 1.8              |
| a <sub>4</sub>  | 431.2653        | 431.2660     | 1.6              |
| a <sub>5</sub>  | 518.2973        | 518.2985     | 2.3              |
| a <sub>6</sub>  | 617.3657        | 617.3672     | 2.4              |
| a <sub>7</sub>  | 714.4185        | 714.4211     | 3.6              |
| a <sub>8</sub>  | 877.4818        | 877.4844     | 3.0              |
| a <sub>9</sub>  | 964.5138        | 964.5201     | 6.5              |
| a <sub>10</sub> | 1051.5459       | 1051.5529    | 6.7              |
| a <sub>11</sub> | 1122.5830       | 1122.5906    | 6.8              |
| a <sub>12</sub> | 1250.6416       | 1250.6532    | 9.3              |
| a <sub>13</sub> | 1540.7530       | 1540.7573    | 2.8              |
| a <sub>15</sub> | 1728.8327       | 1728.8348    | 1.2              |
| b <sub>2</sub>  | 263.1390        | 263.1395     | 1.9              |
| b <sub>3</sub>  | 360.1918        | 360.1924     | 1.7              |
| b <sub>4</sub>  | 459.2602        | 459.2611     | 2.0              |
| b <sub>5</sub>  | 546.2922        | 546.2935     | 2.4              |
| b <sub>6</sub>  | 645.3606        | 645.3622     | 2.5              |
| b <sub>7</sub>  | 742.4134        | 742.4135     | 0.1              |
| b <sub>8</sub>  | 905.4767        | 905.4831     | 7.1              |
| b <sub>9</sub>  | 992.5087        | 992.5156     | 7.0              |
| b <sub>10</sub> | 1079.5408       | 1079.5428    | 1.9              |
| b <sub>12</sub> | 1278.6365       | 1278.6444    | 6.2              |
| b <sub>14</sub> | 1669.7955       | 1669.7991    | 2.2              |
| b <sub>15</sub> | 1756.8276       | 1756.8192    | -4.8             |
| c <sub>3</sub>  | 377.2183        | 377.2190     | 1.9              |
| c <sub>4</sub>  | 476.2867        | 476.2877     | 2.1              |
| c <sub>5</sub>  | 563.3188        | 563.3200     | 2.1              |
| c <sub>7</sub>  | 759.4399        | 759.4426     | 3.6              |
| c <sub>8</sub>  | 922.5033        | 922.5058     | 2.7              |
| c <sub>11</sub> | 1167.6044       | 1167.6100    | 4.8              |
| c <sub>13</sub> | 1585.7744       | 1585.7750    | 0.4              |
| c <sub>14</sub> | 1686.8221       | 1686.8304    | 4.9              |
| c <sub>15</sub> | 1773.8541       | 1773.8492    | -2.8             |
| x <sub>1</sub>  | 173.0921        | 173.0925     | 2.3              |
| x <sub>2</sub>  | 260.1241        | 260.1246     | 1.9              |
| x <sub>3</sub>  | 361.1718        | 361.1733     | 4.2              |
| x <sub>4</sub>  | 651.2832        | 651.2872     | 6.1              |
| x <sub>7</sub>  | 937.4109        | 937.4161     | 5.5              |
| x <sub>8</sub>  | 1024.4429       | 1024.4458    | 2.8              |
| x <sub>9</sub>  | 1187.5063       | 1187.5099    | 3.0              |

|                                |           |           |      |
|--------------------------------|-----------|-----------|------|
| X <sub>10</sub>                | 1284.5590 | 1284.5605 | 1.2  |
| X <sub>11</sub>                | 1383.6274 | 1383.6241 | -2.4 |
| X <sub>12</sub>                | 1470.6595 | 1470.6649 | 3.7  |
| X <sub>13</sub>                | 1569.7279 | 1569.7333 | 3.4  |
| X <sub>14</sub>                | 1666.7806 | 1666.7903 | 5.8  |
| Y <sub>2</sub>                 | 234.1448  | 234.1452  | 1.7  |
| Y <sub>3</sub>                 | 335.1925  | 335.1931  | 1.8  |
| Y <sub>4</sub>                 | 625.3039  | 625.3054  | 2.4  |
| Y <sub>4</sub> <sup>▲</sup>    | 422.2245  | 422.2250  | 1.2  |
| Y <sub>5</sub>                 | 753.3625  | 753.3649  | 3.2  |
| Y <sub>5</sub> <sup>▲</sup>    | 550.2831  | 550.2836  | 0.9  |
| Y <sub>6</sub>                 | 824.3996  | 824.4039  | 5.2  |
| Y <sub>7</sub>                 | 911.4316  | 911.4349  | 3.6  |
| Y <sub>7</sub> <sup>▲</sup>    | 708.3523  | 708.3538  | 2.1  |
| Y <sub>8</sub>                 | 998.4637  | 998.4654  | 1.7  |
| Y <sub>8</sub> <sup>▲</sup>    | 795.3843  | 795.3853  | 1.3  |
| Y <sub>9</sub>                 | 1161.5270 | 1161.5313 | 3.7  |
| Y <sub>10</sub>                | 1258.5798 | 1258.5835 | 2.9  |
| Y <sub>10</sub> <sup>▲</sup>   | 1055.5004 | 1055.5005 | 0.1  |
| Y <sub>11</sub>                | 1357.6482 | 1357.6526 | 3.2  |
| Y <sub>11</sub> <sup>▲</sup>   | 1154.5688 | 1154.5697 | 0.8  |
| Y <sub>12</sub>                | 1444.6802 | 1444.6853 | 3.5  |
| Y <sub>12</sub> <sup>▲</sup>   | 1241.6008 | 1241.6022 | 1.1  |
| Y <sub>13</sub>                | 1543.7486 | 1543.7537 | 3.3  |
| Y <sub>13</sub> <sup>▲</sup>   | 1340.6692 | 1340.6719 | 2.0  |
| Y <sub>14</sub>                | 1640.8014 | 1640.8033 | 1.2  |
| Y <sub>14</sub> <sup>▲</sup>   | 1437.7220 | 1437.7240 | 1.4  |
| Y <sub>15</sub>                | 902.4360  | 902.4376  | 1.8  |
| Y <sub>14</sub> <sup>2+▲</sup> | 719.3646  | 719.3646  | 0.0  |
| Z <sub>2</sub>                 | 218.1261  | 218.1266  | 2.3  |
| Z <sub>3</sub>                 | 319.1738  | 319.1746  | 2.5  |
| Z <sub>4</sub>                 | 609.2852  | 609.2864  | 2.0  |
| Z <sub>5</sub>                 | 737.3438  | 737.3461  | 3.1  |
| Z <sub>6</sub>                 | 808.3809  | 808.3778  | -3.8 |
| Z <sub>7</sub>                 | 895.4129  | 895.4186  | 6.4  |
| Z <sub>8</sub>                 | 982.4449  | 982.4477  | 2.9  |
| Z <sub>9</sub>                 | 1145.5083 | 1145.5115 | 2.8  |
| Z <sub>11</sub>                | 1341.6294 | 1341.6309 | 1.1  |
| Z <sub>12</sub>                | 1428.6615 | 1428.6663 | 3.4  |
| Z <sub>13</sub>                | 1527.7299 | 1527.7362 | 4.1  |
| Z <sub>14</sub>                | 1624.7826 | 1624.7982 | 9.6  |
| Z <sub>15</sub>                | 1787.8460 | 1787.8501 | 2.3  |

**Table S12:** Complete list of ions generated by UVPD of a tryptic peptide from TAB1 glycoprotein using two pulse of 1.5 mJ laser energy to activate the peptide (VYPVSVPYSSAQSTS<sub>(g)</sub>K, 2+, m/z 951.97). The fragment ions that are critical for localization of GlcNAc sites are listed in blue font.

| Identified Ions | Theoretical m/z | Observed m/z | Mass Error (ppm) |
|-----------------|-----------------|--------------|------------------|
| a <sub>2</sub>  | 235.1441        | 235.1445     | 1.7              |
| a <sub>3</sub>  | 332.1969        | 332.1974     | 1.5              |
| a <sub>4</sub>  | 431.2653        | 431.2660     | 1.6              |
| a <sub>5</sub>  | 518.2973        | 518.2985     | 2.3              |
| a <sub>6</sub>  | 617.3657        | 617.3672     | 2.4              |
| a <sub>7</sub>  | 714.4185        | 714.4202     | 2.4              |
| a <sub>8</sub>  | 877.4818        | 877.4850     | 3.6              |
| a <sub>9</sub>  | 964.5138        | 964.5187     | 5.1              |
| a <sub>10</sub> | 1051.5459       | 1051.5494    | 3.3              |
| a <sub>11</sub> | 1122.5830       | 1122.5913    | 7.4              |
| a <sub>13</sub> | 1337.6736       | 1337.6647    | -6.7             |
| a <sub>14</sub> | 1438.7213       | 1438.7299    | 6.0              |
| a <sub>15</sub> | 1728.8327       | 1728.8347    | 1.2              |
| b <sub>2</sub>  | 263.1390        | 263.1396     | 2.3              |
| b <sub>3</sub>  | 360.1918        | 360.1924     | 1.7              |
| b <sub>4</sub>  | 459.2602        | 459.2611     | 2.0              |
| b <sub>5</sub>  | 546.2922        | 546.2935     | 2.4              |
| b <sub>6</sub>  | 645.3606        | 645.3622     | 2.5              |
| b <sub>7</sub>  | 742.4134        | 742.4150     | 2.2              |
| b <sub>8</sub>  | 905.4767        | 905.4810     | 4.7              |
| b <sub>9</sub>  | 992.5087        | 992.5151     | 6.4              |
| b <sub>10</sub> | 1079.5408       | 1079.5469    | 5.7              |
| b <sub>12</sub> | 1278.6365       | 1278.6454    | 7.0              |
| b <sub>13</sub> | 1365.6685       | 1365.6754    | 5.1              |
| b <sub>14</sub> | 1466.7162       | 1466.7214    | 3.5              |
| b <sub>15</sub> | 1756.8276       | 1756.8242    | -1.9             |
| c <sub>3</sub>  | 377.2183        | 377.2192     | 2.4              |
| c <sub>4</sub>  | 476.2867        | 476.2878     | 2.3              |
| c <sub>5</sub>  | 563.3188        | 563.3201     | 2.3              |
| c <sub>7</sub>  | 759.4399        | 759.4427     | 3.7              |
| c <sub>8</sub>  | 922.5033        | 922.5065     | 3.5              |
| c <sub>11</sub> | 1167.6044       | 1167.6145    | 8.7              |
| c <sub>12</sub> | 1295.6630       | 1295.6661    | 2.4              |
| c <sub>14</sub> | 1483.7427       | 1483.7472    | 3.0              |
| c <sub>15</sub> | 1773.8541       | 1773.8499    | -2.4             |
| x <sub>1</sub>  | 173.0921        | 173.0924     | 1.7              |
| x <sub>5</sub>  | 779.3418        | 779.3431     | 1.7              |
| x <sub>7</sub>  | 937.4109        | 937.4172     | 6.7              |
| x <sub>8</sub>  | 1024.4429       | 1024.4445    | 1.6              |
| x <sub>9</sub>  | 1187.5063       | 1187.5104    | 3.5              |
| x <sub>10</sub> | 1284.5590       | 1284.5620    | 2.3              |

|                             |           |           |      |
|-----------------------------|-----------|-----------|------|
| $x_{11}$                    | 1383.6274 | 1383.6262 | -0.9 |
| $x_{12}$                    | 1470.6595 | 1470.6650 | 3.7  |
| $x_{13}$                    | 1569.7279 | 1569.7327 | 3.1  |
| $x_{14}$                    | 1666.7806 | 1666.7876 | 4.2  |
| $y_3^{\blacktriangle}$      | 335.1925  | 335.1924  | -0.3 |
| $y_4^{\blacktriangle}$      | 422.2245  | 422.2250  | 1.2  |
| $y_5^{\blacktriangle}$      | 550.2831  | 550.2836  | 0.9  |
| $y_6$                       | 824.3996  | 824.3967  | -3.5 |
| $y_7$                       | 911.4316  | 911.4360  | 4.8  |
| $y_7^{\blacktriangle}$      | 708.3523  | 708.3538  | 2.1  |
| $y_8$                       | 998.4637  | 998.4660  | 2.3  |
| $y_8^{\blacktriangle}$      | 795.3843  | 795.3853  | 1.3  |
| $y_9$                       | 1161.5270 | 1161.5313 | 3.7  |
| $y_{10}$                    | 1258.5798 | 1258.5837 | 3.1  |
| $y_{10}^{\blacktriangle}$   | 1055.5004 | 1055.5005 | 0.1  |
| $y_{11}$                    | 1357.6482 | 1357.6523 | 3.0  |
| $y_{12}$                    | 1444.6802 | 1444.6857 | 3.8  |
| $y_{13}$                    | 1543.7486 | 1543.7534 | 3.1  |
| $y_{14}$                    | 1640.8014 | 1640.8043 | 1.8  |
| $y_{15}^{\blacktriangle}$   | 1600.7853 | 1600.7840 | -0.8 |
| $y_{14}^{2+\blacktriangle}$ | 719.3646  | 719.3646  | 0.0  |
| $z_2$                       | 421.2055  | 421.2081  | 6.2  |
| $z_3$                       | 808.3809  | 808.3802  | -0.9 |
| $z_4$                       | 895.4129  | 895.4171  | 4.7  |
| $z_5$                       | 982.4449  | 982.4475  | 2.6  |
| $z_6$                       | 1145.5083 | 1145.5121 | 3.3  |
| $z_7$                       | 1428.6615 | 1428.6676 | 4.3  |
| $z_8$                       | 1527.7299 | 1527.7355 | 3.7  |
| $z_9$                       | 1624.7826 | 1624.7843 | 1.0  |
| $z_{10}$                    | 1787.8460 | 1787.8496 | 2.0  |



**Table S13:** Complete list of ions generated by UVPD of a tryptic peptide from TAB1 glycoprotein using two pulse of 1.5 mJ laser energy to activate the peptide (LWSVDHGEQSVVT<sub>(g)</sub>AP, 2+,  $m/z$  914.43). The fragment ions that are critical for localization of GlcNAc sites are listed in blue font.

| Identified Ions              | Theoretical $m/z$ | Observed $m/z$ | Mass Error (ppm) |
|------------------------------|-------------------|----------------|------------------|
| a <sub>2</sub>               | 272.1757          | 272.1757       | 0.0              |
| a <sub>3</sub>               | 359.2078          | 359.2076       | -0.6             |
| a <sub>4</sub>               | 458.2762          | 458.2765       | 0.7              |
| a <sub>5</sub>               | 573.3031          | 573.3025       | -1.0             |
| a <sub>6</sub>               | 710.3620          | 710.3655       | 4.9              |
| a <sub>7</sub>               | 767.3835          | 767.3790       | -5.9             |
| a <sub>9</sub>               | 1024.4847         | 1024.4816      | -3.0             |
| a <sub>10</sub>              | 1111.5167         | 1111.5126      | -3.7             |
| a <sub>11</sub>              | 1210.5851         | 1210.5841      | -0.8             |
| a <sub>12</sub>              | 1309.6535         | 1309.6570      | 2.7              |
| b <sub>2</sub>               | 300.1706          | 300.1704       | -0.7             |
| b <sub>3</sub>               | 387.2027          | 387.2025       | -0.5             |
| b <sub>4</sub>               | 486.2711          | 486.2712       | 0.2              |
| b <sub>5</sub>               | 601.2980          | 601.2972       | -1.3             |
| b <sub>6</sub>               | 738.3569          | 738.3547       | -3.0             |
| b <sub>7</sub>               | 795.3784          | 795.3757       | -3.4             |
| b <sub>8</sub>               | 924.4210          | 924.4193       | -1.8             |
| b <sub>9</sub>               | 1052.4796         | 1052.4800      | 0.4              |
| b <sub>10</sub>              | 1139.5116         | 1139.5131      | 1.3              |
| b <sub>11</sub>              | 1238.5800         | 1238.5807      | 0.6              |
| b <sub>12</sub>              | 1337.6484         | 1337.6486      | 0.1              |
| b <sub>13</sub>              | 1641.7755         | 1641.7672      | -5.1             |
| b <sub>13</sub> <sup>▲</sup> | 1438.6961         | 1438.6962      | 0.0              |
| b <sub>14</sub> <sup>▲</sup> | 1509.7332         | 1509.7334      | 0.1              |
| c <sub>2</sub>               | 317.1972          | 317.1969       | -0.9             |
| c <sub>3</sub>               | 404.2292          | 404.2293       | 0.2              |
| c <sub>4</sub>               | 503.2976          | 503.2983       | 1.4              |
| c <sub>5</sub>               | 618.3246          | 618.3244       | -0.3             |
| c <sub>6</sub>               | 755.3835          | 755.3800       | -4.6             |
| c <sub>7</sub>               | 812.4049          | 812.3983       | -8.1             |
| c <sub>8</sub>               | 941.4475          | 941.4472       | -0.3             |
| c <sub>9</sub>               | 1069.5061         | 1069.5028      | -3.1             |
| c <sub>10</sub>              | 1156.5381         | 1156.5431      | 4.3              |
| c <sub>11</sub>              | 1255.6066         | 1255.6046      | -1.6             |
| c <sub>12</sub>              | 1354.6750         | 1354.6802      | 3.8              |
| c <sub>13</sub>              | 1658.8020         | 1658.8044      | 1.4              |
| x <sub>3</sub>               | 517.2140          | 517.2180       | 7.7              |
| x <sub>5</sub>               | 715.3508          | 715.3579       | 9.9              |
| x <sub>6</sub>               | 802.3829          | 802.3799       | -3.7             |
| x <sub>10</sub>              | 1253.5644         | 1253.5714      | 5.6              |

|                 |           |           |      |
|-----------------|-----------|-----------|------|
| $x_{11}$        | 1368.5914 | 1368.5956 | 3.1  |
| $x_{12}$        | 1467.6598 | 1467.6666 | 4.6  |
| $y_2$           | 187.1077  | 187.1077  | 0.0  |
| $y_3$           | 491.2348  | 491.2344  | -0.8 |
| $y_3^\Delta$    | 288.1554  | 288.1551  | -1.0 |
| $y_4$           | 590.3032  | 590.3036  | 0.7  |
| $y_4^\Delta$    | 387.2238  | 387.2238  | -0.1 |
| $y_5$           | 689.3716  | 689.3663  | -7.7 |
| $y_5^\Delta$    | 486.2922  | 486.2925  | 0.7  |
| $y_6$           | 776.4036  | 776.4042  | 0.8  |
| $y_6^\Delta$    | 573.3243  | 573.3253  | 1.7  |
| $y_7$           | 904.4622  | 904.4609  | -1.4 |
| $y_7^\Delta$    | 701.3828  | 701.3830  | 0.3  |
| $y_{10}$        | 1227.5852 | 1227.5775 | -6.3 |
| $y_{11}$        | 1342.6121 | 1342.6188 | 5.0  |
| $y_{12}$        | 1441.6805 | 1441.6860 | 3.8  |
| $y_{13}$        | 1528.7125 | 1528.7130 | 0.3  |
| $y_{13}^\Delta$ | 1325.6332 | 1325.6295 | -2.8 |
| $y_{14}$        | 857.8996  | 857.8916  | -9.3 |
| $z_3$           | 475.2160  | 475.2160  | 0.0  |

---

**Table S14:** Complete list of ions generated by UVPD of a tryptic peptide from TAB1 glycoprotein using two pulse of 1.5 mJ laser energy to activate the peptide (TSVTLSLVMP SQGMVNGAHS<sub>(g)</sub>ASTLDEATP TLTNQSPTLT LQSTNTHTQSSSSSDGGLFR, 4+,  $m/z$  1617.52). The fragment ions that are critical for localization of GlcNAc sites are listed in blue font.

| Identified Ions               | Theoretical $m/z$ | Observed $m/z$ | Mass Error (ppm) |
|-------------------------------|-------------------|----------------|------------------|
| a <sub>3</sub>                | 260.1605          | 260.1607       | 0.8              |
| a <sub>4</sub>                | 361.2082          | 361.2086       | 1.1              |
| a <sub>5</sub>                | 474.2922          | 474.2927       | 1.1              |
| a <sub>6</sub>                | 561.3243          | 561.3254       | 2.0              |
| a <sub>7</sub>                | 674.4083          | 674.4100       | 2.5              |
| a <sub>8</sub>                | 773.4767          | 773.4773       | 0.8              |
| a <sub>9</sub>                | 904.5172          | 904.5195       | 2.5              |
| a <sub>11</sub>               | 1088.6020         | 1088.5989      | -2.8             |
| a <sub>9</sub> <sup>2+</sup>  | 452.2586          | 452.2576       | -2.2             |
| a <sub>21</sub> <sup>2+</sup> | 1150.5607         | 1150.5565      | -3.7             |
| a <sub>26</sub> <sup>2+</sup> | 1394.1746         | 1394.1774      | 2.0              |
| a <sub>27</sub> <sup>2+</sup> | 1458.6959         | 1458.6949      | -0.7             |
| a <sub>28</sub> <sup>2+</sup> | 1494.2144         | 1494.2272      | 8.6              |
| a <sub>29</sub> <sup>2+</sup> | 1544.7383         | 1544.7318      | -4.2             |
| a <sub>30</sub> <sup>2+</sup> | 1593.2646         | 1593.2621      | -1.6             |
| a <sub>31</sub> <sup>2+</sup> | 1643.7885         | 1643.7771      | -6.9             |
| a <sub>32</sub> <sup>2+</sup> | 1700.3305         | 1700.3246      | -3.5             |
| b <sub>2</sub>                | 189.0870          | 189.0871       | 0.5              |
| b <sub>3</sub>                | 288.1554          | 288.1556       | 0.7              |
| b <sub>4</sub>                | 389.2031          | 389.2033       | 0.5              |
| b <sub>5</sub>                | 502.2871          | 502.2872       | 0.2              |
| b <sub>6</sub>                | 589.3192          | 589.3196       | 0.7              |
| b <sub>7</sub>                | 702.4032          | 702.4035       | 0.4              |
| b <sub>8</sub>                | 801.4716          | 801.4722       | 0.7              |
| b <sub>9</sub>                | 932.5121          | 932.5130       | 1.0              |
| b <sub>15</sub>               | 1560.7760         | 1560.7788      | 1.8              |
| b <sub>8</sub> <sup>2+</sup>  | 401.2395          | 401.2396       | 0.2              |
| b <sub>17</sub> <sup>2+</sup> | 887.4473          | 887.4393       | -9.0             |
| b <sub>19</sub> <sup>2+</sup> | 951.4766          | 951.4690       | -8.0             |
| b <sub>24</sub> <sup>2+</sup> | 1294.6202         | 1294.6328      | 9.7              |
| b <sub>25</sub> <sup>2+</sup> | 1351.1622         | 1351.1571      | -3.8             |
| b <sub>26</sub> <sup>2+</sup> | 1408.6757         | 1408.6799      | 3.0              |
| b <sub>27</sub> <sup>2+</sup> | 1473.1970         | 1473.2104      | 9.1              |
| b <sub>28</sub> <sup>2+</sup> | 1508.7155         | 1508.7216      | 4.0              |
| b <sub>29</sub> <sup>2+</sup> | 1559.2394         | 1559.2487      | 6.0              |
| b <sub>30</sub> <sup>2+</sup> | 1607.7657         | 1607.7727      | 4.4              |
| b <sub>31</sub> <sup>2+</sup> | 1658.2896         | 1658.2921      | 1.5              |

|               |           |           |      |
|---------------|-----------|-----------|------|
| $b_{32}^{2+}$ | 1714.8316 | 1714.8273 | -2.5 |
| $b_{50}^{3+}$ | 1790.1980 | 1790.1943 | -2.1 |
| $c_3$         | 305.1819  | 305.1821  | 0.7  |
| $c_5$         | 519.3137  | 519.3145  | 1.5  |
| $c_8$         | 818.4982  | 818.4993  | 1.3  |
| $c_{20}^{2+}$ | 1028.5198 | 1028.5133 | -5.8 |
| $c_{21}^{2+}$ | 1173.5750 | 1173.5739 | -0.9 |
| $c_{22}^{2+}$ | 1209.0936 | 1209.0929 | -0.6 |
| $c_{23}^{2+}$ | 1252.6096 | 1252.6129 | 2.6  |
| $c_{24}^{2+}$ | 1303.1334 | 1303.1295 | -3.0 |
| $c_{25}^{2+}$ | 1359.6755 | 1359.6735 | -1.5 |
| $c_{26}^{2+}$ | 1417.1889 | 1417.1835 | -3.8 |
| $c_{28}^{2+}$ | 1517.2288 | 1517.2291 | 0.2  |
| $c_{29}^{2+}$ | 1567.7526 | 1567.7563 | 2.4  |
| $c_{30}^{2+}$ | 1616.2790 | 1616.2788 | -0.1 |
| $c_{31}^{2+}$ | 1666.8028 | 1666.7987 | -2.5 |
| $c_{32}^{2+}$ | 1723.3449 | 1723.3409 | -2.3 |
| $x_1$         | 201.0982  | 201.0983  | 0.5  |
| $x_2$         | 348.1666  | 348.1667  | 0.3  |
| $x_3$         | 461.2507  | 461.2512  | 1.1  |
| $x_4$         | 518.2721  | 518.2718  | -0.6 |
| $x_5$         | 575.2936  | 575.2939  | 0.5  |
| $x_7$         | 777.3526  | 777.3539  | 1.7  |
| $x_8$         | 864.3846  | 864.3864  | 2.1  |
| $x_9$         | 951.4166  | 951.4172  | 0.6  |
| $x_{10}$      | 1038.4487 | 1038.4502 | 1.4  |
| $x_{12}$      | 1212.5127 | 1212.5122 | -0.4 |
| $x_{15}^{2+}$ | 789.8426  | 789.8439  | 1.6  |
| $x_{17}^{2+}$ | 897.3879  | 897.3911  | 3.6  |
| $x_{18}^{2+}$ | 947.9117  | 947.9127  | 1.1  |
| $x_{19}^{2+}$ | 991.4277  | 991.4286  | 0.9  |
| $x_{20}^{2+}$ | 1055.4570 | 1055.4615 | 4.3  |
| $x_{21}^{2+}$ | 1111.9991 | 1111.9979 | -1.1 |
| $x_{22}^{2+}$ | 1162.5229 | 1162.5203 | -2.2 |
| $x_{23}^{2+}$ | 1219.0649 | 1219.0668 | 1.6  |
| $x_{24}^{2+}$ | 1269.5888 | 1269.5880 | -0.6 |
| $x_{25}^{2+}$ | 1318.1152 | 1318.1272 | 9.1  |
| $x_{26}^{2+}$ | 1361.6312 | 1361.6270 | -3.1 |
| $x_{27}^{2+}$ | 1425.6605 | 1425.6648 | 3.0  |
| $x_{28}^{2+}$ | 1482.6819 | 1482.6910 | 6.1  |
| $x_{29}^{2+}$ | 1533.2058 | 1533.2173 | 7.5  |
| $x_{30}^{2+}$ | 1589.7478 | 1589.7584 | 6.7  |

|                                |           |           |      |
|--------------------------------|-----------|-----------|------|
| X <sub>31</sub> <sup>2+</sup>  | 1640.2716 | 1640.2734 | 1.1  |
| X <sub>32</sub> <sup>2+</sup>  | 1688.7980 | 1688.7920 | -3.6 |
| X <sub>33</sub> <sup>2+</sup>  | 1739.3219 | 1739.3363 | 8.3  |
| X <sub>34</sub> <sup>2+</sup>  | 1774.8404 | 1774.8545 | 7.9  |
| Y <sub>2</sub>                 | 322.1874  | 322.1875  | 0.3  |
| Y <sub>3</sub>                 | 435.2714  | 435.2718  | 0.9  |
| Y <sub>4</sub>                 | 492.2929  | 492.2930  | 0.2  |
| Y <sub>5</sub>                 | 549.3143  | 549.3147  | 0.7  |
| Y <sub>6</sub>                 | 664.3413  | 664.3417  | 0.6  |
| Y <sub>7</sub>                 | 751.3733  | 751.3746  | 1.7  |
| Y <sub>8</sub>                 | 838.4053  | 838.4059  | 0.7  |
| Y <sub>9</sub>                 | 925.4374  | 925.4383  | 1.0  |
| Y <sub>10</sub>                | 1012.4694 | 1012.4702 | 0.8  |
| Y <sub>11</sub>                | 1099.5014 | 1099.5026 | 1.1  |
| Y <sub>13</sub>                | 1314.5920 | 1314.5935 | 1.1  |
| Y <sub>14</sub>                | 1415.6397 | 1415.6354 | -3.0 |
| Y <sub>16</sub> <sup>2+</sup>  | 827.3768  | 827.3771  | 0.4  |
| Y <sub>17</sub> <sup>2+</sup>  | 884.3983  | 884.3974  | -1.0 |
| Y <sub>18</sub> <sup>2+</sup>  | 934.9221  | 934.9235  | 1.5  |
| Y <sub>19</sub> <sup>2+</sup>  | 978.4381  | 978.4391  | 1.0  |
| Y <sub>20</sub> <sup>2+</sup>  | 1042.4674 | 1042.4681 | 0.7  |
| Y <sub>23</sub> <sup>2+</sup>  | 1206.0753 | 1206.0762 | 0.7  |
| Y <sub>24</sub> <sup>2+</sup>  | 1256.5991 | 1256.5997 | 0.5  |
| Y <sub>25</sub> <sup>2+</sup>  | 1305.1255 | 1305.1238 | -1.3 |
| Y <sub>25</sub> <sup>2+▲</sup> | 1305.1255 | 1305.1256 | 0.1  |
| Y <sub>26</sub> <sup>2+</sup>  | 1348.6415 | 1348.6432 | 1.3  |
| Y <sub>27</sub> <sup>2+</sup>  | 1412.6708 | 1412.6721 | 0.9  |
| Y <sub>28</sub> <sup>2+</sup>  | 1469.6923 | 1469.6917 | -0.4 |
| Y <sub>29</sub> <sup>2+</sup>  | 1520.2161 | 1520.2178 | 1.1  |
| Y <sub>30</sub> <sup>2+</sup>  | 1576.7582 | 1576.7584 | 0.1  |
| Y <sub>31</sub> <sup>2+</sup>  | 1627.2820 | 1627.2797 | -1.4 |
| Y <sub>32</sub> <sup>2+</sup>  | 1675.8084 | 1675.8069 | -0.9 |
| Y <sub>33</sub> <sup>2+</sup>  | 1726.3322 | 1726.3324 | 0.1  |
| Y <sub>34</sub> <sup>2+</sup>  | 1761.8508 | 1761.8506 | -0.1 |
| Y <sub>32</sub> <sup>3+</sup>  | 1117.5413 | 1117.5469 | 5.0  |
| Y <sub>41</sub> <sup>3+</sup>  | 1477.0302 | 1477.0354 | 3.5  |
| Y <sub>49</sub> <sup>3+</sup>  | 1741.8133 | 1741.8134 | 0.1  |
| Z <sub>2</sub>                 | 306.1686  | 306.1689  | 1.0  |
| Z <sub>3</sub>                 | 419.2527  | 419.2528  | 0.2  |
| Z <sub>4</sub>                 | 476.2742  | 476.2745  | 0.6  |
| Z <sub>5</sub>                 | 533.2956  | 533.2956  | 0.0  |
| Z <sub>6</sub>                 | 648.3226  | 648.3231  | 0.8  |
| Z <sub>7</sub>                 | 735.3546  | 735.3532  | -1.9 |

|               |           |           |      |
|---------------|-----------|-----------|------|
| $z_8$         | 822.3866  | 822.3924  | 7.1  |
| $z_9$         | 909.4186  | 909.4188  | 0.2  |
| $z_{10}$      | 996.4507  | 996.4511  | 0.4  |
| $z_{11}$      | 1083.4827 | 1083.4808 | -1.8 |
| $z_{13}$      | 1298.5733 | 1298.5696 | -2.8 |
| $z_{14}$      | 1399.6210 | 1399.6171 | -2.8 |
| $z_{16}$      | 1637.7276 | 1637.7262 | -0.9 |
| $z_{15}^{2+}$ | 768.8436  | 768.8498  | 8.1  |
| $z_{16}^{2+}$ | 819.3674  | 819.3654  | -2.4 |
| $z_{18}^{2+}$ | 926.9127  | 926.9117  | -1.1 |
| $z_{20}^{2+}$ | 1034.4580 | 1034.4567 | -1.3 |
| $z_{22}^{2+}$ | 1141.5239 | 1141.5182 | -5.0 |
| $z_{24}^{2+}$ | 1248.5898 | 1248.5898 | 0.0  |
| $z_{25}^{2+}$ | 1297.1162 | 1297.1196 | 2.6  |
| $z_{26}^{2+}$ | 1340.6322 | 1340.6364 | 3.1  |
| $z_{27}^{2+}$ | 1404.6615 | 1404.6642 | 1.9  |
| $z_{28}^{2+}$ | 1461.6829 | 1461.6843 | 1.0  |
| $z_{29}^{2+}$ | 1512.2068 | 1512.2067 | -0.1 |
| $z_{31}^{2+}$ | 1619.2726 | 1619.2648 | -4.8 |
| $z_{33}^{2+}$ | 1718.3229 | 1718.3218 | -0.6 |

**Table S15:** Complete list of ions generated by UVPD of a tryptic peptide from TAB1 glycoprotein using two pulse of 1.5 mJ laser energy to activate the peptide (TSVTLSLVMP SQGMVNGAHSASTLDEATP-TL TNQSPTLT LQSTNTHT<sub>(g)</sub>QSSSSSDGGLFR, 4+,  $m/z$  1617.52). The fragment ions that are critical for localization of GlcNAc sites are listed in blue font.

| Identified Ions               | Theoretical $m/z$ | Observed $m/z$ | Mass Error (ppm) |
|-------------------------------|-------------------|----------------|------------------|
| a <sub>3</sub>                | 260.1605          | 260.1606       | 0.4              |
| a <sub>4</sub>                | 361.2082          | 361.2076       | -1.7             |
| a <sub>5</sub>                | 474.2922          | 474.2922       | 0.0              |
| a <sub>7</sub>                | 674.4083          | 674.4089       | 0.9              |
| a <sub>8</sub>                | 773.4767          | 773.4775       | 1.0              |
| a <sub>9</sub>                | 904.5172          | 904.5170       | -0.2             |
| a <sub>9</sub> <sup>2+</sup>  | 452.2586          | 452.2582       | -0.9             |
| a <sub>31</sub> <sup>2+</sup> | 1542.2488         | 1542.2433      | -3.6             |
| a <sub>32</sub> <sup>2+</sup> | 1598.7908         | 1598.7877      | -1.9             |
| b <sub>2</sub>                | 189.0870          | 189.0870       | 0.0              |
| b <sub>3</sub>                | 288.1554          | 288.1553       | -0.3             |
| b <sub>4</sub>                | 389.2031          | 389.2024       | -1.8             |
| b <sub>5</sub>                | 502.2871          | 502.2870       | -0.2             |
| b <sub>6</sub>                | 589.3192          | 589.3190       | -0.3             |
| b <sub>7</sub>                | 702.4032          | 702.4033       | 0.1              |
| b <sub>8</sub>                | 801.4716          | 801.4717       | 0.1              |
| b <sub>9</sub>                | 932.5121          | 932.5126       | 0.5              |
| b <sub>15</sub>               | 1560.7760         | 1560.7613      | -9.4             |
| b <sub>25</sub> <sup>2+</sup> | 1249.6225         | 1249.6123      | -8.2             |
| b <sub>29</sub> <sup>2+</sup> | 1457.6997         | 1457.6875      | -8.4             |
| b <sub>32</sub> <sup>2+</sup> | 1613.2919         | 1613.2977      | 3.6              |
| b <sub>35</sub> <sup>2+</sup> | 1784.8665         | 1784.8520      | -8.1             |
| b <sub>49</sub> <sup>3+</sup> | 1761.1873         | 1761.2014      | 8.0              |
| b <sub>50</sub> <sup>3+</sup> | 1790.1980         | 1790.1940      | -2.2             |
| c <sub>3</sub>                | 305.1819          | 305.1817       | -0.7             |
| c <sub>4</sub>                | 406.2296          | 406.2286       | -2.5             |
| c <sub>5</sub>                | 519.3137          | 519.3134       | -0.6             |
| c <sub>8</sub>                | 818.4982          | 818.5009       | 3.3              |
| c <sub>9</sub>                | 949.5387          | 949.5302       | -9.0             |
| c <sub>24</sub> <sup>2+</sup> | 1151.0699         | 1151.0688      | -1.0             |
| c <sub>31</sub> <sup>2+</sup> | 1514.7393         | 1514.7309      | -5.5             |
| c <sub>32</sub> <sup>2+</sup> | 1565.2632         | 1565.2507      | -8.0             |
| x <sub>1</sub>                | 201.0982          | 201.0982       | 0.0              |
| x <sub>2</sub>                | 348.1666          | 348.1664       | -0.6             |
| x <sub>3</sub>                | 461.2507          | 461.2504       | -0.7             |
| x <sub>4</sub>                | 518.2721          | 518.2719       | -0.4             |
| x <sub>5</sub>                | 575.2936          | 575.2929       | -1.2             |
| x <sub>6</sub>                | 690.3205          | 690.3217       | 1.7              |

|                                |           |           |      |
|--------------------------------|-----------|-----------|------|
| x <sub>7</sub>                 | 777.3526  | 777.3541  | 1.9  |
| x <sub>8</sub>                 | 864.3846  | 864.3821  | -2.9 |
| x <sub>9</sub>                 | 951.4166  | 951.4167  | 0.1  |
| x <sub>10</sub>                | 1038.4487 | 1038.4462 | -2.4 |
| x <sub>11</sub>                | 1125.4807 | 1125.4807 | 0.0  |
| x <sub>12</sub>                | 1212.5127 | 1212.5127 | 0.0  |
| x <sub>7</sub> <sup>2+</sup>   | 389.1799  | 389.1832  | 8.5  |
| Y <sub>2</sub>                 | 322.1874  | 322.1873  | -0.3 |
| Y <sub>3</sub>                 | 435.2714  | 435.2716  | 0.5  |
| Y <sub>4</sub>                 | 492.2929  | 492.2933  | 0.8  |
| Y <sub>5</sub>                 | 549.3143  | 549.3144  | 0.2  |
| Y <sub>6</sub>                 | 664.3413  | 664.3412  | -0.2 |
| Y <sub>7</sub>                 | 751.3733  | 751.3740  | 0.9  |
| Y <sub>8</sub>                 | 838.4053  | 838.4049  | -0.5 |
| Y <sub>9</sub>                 | 925.4374  | 925.4384  | 1.1  |
| Y <sub>10</sub>                | 1012.4694 | 1012.4688 | -0.6 |
| Y <sub>11</sub>                | 1099.5014 | 1099.5028 | 1.3  |
| Y <sub>12</sub>                | 1186.5335 | 1186.5298 | -3.1 |
| Y <sub>13</sub>                | 1314.5920 | 1314.5923 | 0.2  |
| Y <sub>14</sub>                | 1618.7191 | 1618.7260 | 4.3  |
| Y <sub>15</sub>                | 1755.7780 | 1755.7890 | 6.3  |
| Y <sub>26</sub> <sup>2+</sup>  | 1450.1812 | 1450.1879 | 4.6  |
| Y <sub>25</sub> <sup>2+▲</sup> | 1305.1255 | 1305.1256 | 0.1  |
| Y <sub>28</sub> <sup>2+</sup>  | 1571.2320 | 1571.2399 | 5.0  |
| Y <sub>29</sub> <sup>2+</sup>  | 1621.7558 | 1621.7544 | -0.9 |
| Y <sub>41</sub> <sup>3+</sup>  | 1477.0302 | 1477.0210 | -6.2 |
| Y <sub>49</sub> <sup>3+</sup>  | 1741.8133 | 1741.8300 | 9.6  |
| Z <sub>2</sub>                 | 306.1686  | 306.1688  | 0.7  |
| Z <sub>3</sub>                 | 419.2527  | 419.2524  | -0.7 |
| Z <sub>4</sub>                 | 476.2742  | 476.2738  | -0.8 |
| Z <sub>5</sub>                 | 533.2956  | 533.2957  | 0.2  |
| Z <sub>6</sub>                 | 648.3226  | 648.3225  | -0.2 |
| Z <sub>7</sub>                 | 735.3546  | 735.3535  | -1.5 |
| Z <sub>8</sub>                 | 822.3866  | 822.3843  | -2.8 |
| Z <sub>9</sub>                 | 909.4186  | 909.4196  | 1.1  |
| Z <sub>10</sub>                | 996.4507  | 996.4516  | 0.9  |
| Z <sub>11</sub>                | 1083.4827 | 1083.4838 | 1.0  |
| Z <sub>12</sub>                | 1170.5147 | 1170.5128 | -1.6 |
| Z <sub>13</sub>                | 1298.5733 | 1298.5709 | -1.8 |
| Z <sub>28</sub> <sup>2+</sup>  | 1563.2226 | 1563.2202 | -1.5 |



**Table S16:** Complete list of ions generated by EThcD of a tryptic peptide from TAB1 glycoprotein using 50 ms ETD and 25% supplemental energy to activate the peptide (VYPVSVPYSS<sub>(g)</sub>AQSTSK, 2+, m/z 951.97). The fragment ions that are critical for localization of GlcNAc sites are listed in blue font.

| Identified Ions                | Theoretical m/z | Observed m/z | Mass Error (ppm) |
|--------------------------------|-----------------|--------------|------------------|
| a <sub>2</sub>                 | 263.1390        | 263.1389     | -0.4             |
| a <sub>3</sub>                 | 360.1918        | 360.1918     | 0.0              |
| a <sub>4</sub>                 | 459.2602        | 459.2602     | 0.0              |
| a <sub>5</sub>                 | 546.2922        | 546.2921     | -0.2             |
| a <sub>6</sub>                 | 645.3606        | 645.3607     | 0.2              |
| a <sub>7</sub>                 | 742.4134        | 742.4117     | -2.3             |
| a <sub>8</sub>                 | 905.4767        | 905.4761     | -0.7             |
| a <sub>9</sub>                 | 992.5087        | 992.5121     | 3.4              |
| c <sub>10</sub>                | 1299.6467       | 1299.6447    | -1.5             |
| c <sub>11</sub>                | 1370.6838       | 1370.6864    | 1.9              |
| c <sub>12</sub>                | 1498.7424       | 1498.7385    | -2.6             |
| c <sub>13</sub>                | 1585.7744       | 1585.7721    | -1.5             |
| c <sub>15</sub>                | 1773.8541       | 1773.8472    | -3.9             |
| Y <sub>1</sub>                 | 147.1128        | 147.1127     | -0.7             |
| Y <sub>2</sub>                 | 234.1448        | 234.1450     | 0.9              |
| Y <sub>3</sub>                 | 335.1925        | 335.1926     | 0.3              |
| Y <sub>4</sub>                 | 422.2245        | 422.2239     | -1.4             |
| Y <sub>5</sub>                 | 550.2831        | 550.2816     | -2.7             |
| Y <sub>6</sub>                 | 621.3202        | 621.3191     | -1.8             |
| Y <sub>7</sub>                 | 911.4316        | 911.4345     | 3.2              |
| Y <sub>7</sub> <sup>▲</sup>    | 708.3523        | 708.3540     | 2.4              |
| Y <sub>8</sub>                 | 998.4637        | 998.4646     | 0.9              |
| Y <sub>8</sub> <sup>▲</sup>    | 795.3843        | 795.3842     | -0.1             |
| Y <sub>9</sub>                 | 1161.5270       | 1161.5265    | -0.4             |
| Y <sub>10</sub>                | 1258.5798       | 1258.5798    | 0.0              |
| Y <sub>10</sub> <sup>▲</sup>   | 1055.5004       | 1055.5010    | 0.6              |
| Y <sub>11</sub>                | 1357.6482       | 1357.6492    | 0.7              |
| Y <sub>11</sub> <sup>▲</sup>   | 1154.5688       | 1154.5697    | 0.8              |
| Y <sub>12</sub>                | 1444.6802       | 1444.6799    | -0.2             |
| Y <sub>12</sub> <sup>▲</sup>   | 1241.6008       | 1241.6022    | 1.1              |
| Y <sub>13</sub>                | 1543.7486       | 1543.7520    | 2.2              |
| Y <sub>14</sub>                | 1640.8014       | 1640.8004    | -0.6             |
| Y <sub>14</sub> <sup>▲</sup>   | 1437.7220       | 1437.7222    | 0.1              |
| Y <sub>15</sub> <sup>▲</sup>   | 1600.7853       | 1600.7850    | -0.2             |
| Y <sub>10</sub> <sup>2+</sup>  | 629.7935        | 629.7957     | 3.5              |
| Y <sub>11</sub> <sup>2+</sup>  | 679.3277        | 679.3250     | -4.0             |
| Y <sub>14</sub> <sup>2+▲</sup> | 719.3646        | 719.3646     | 0.0              |
| Y <sub>15</sub> <sup>2+▲</sup> | 800.8963        | 800.8969     | 0.7              |
| Z <sub>6</sub>                 | 605.3015        | 605.3008     | -1.2             |

|          |           |           |      |
|----------|-----------|-----------|------|
| $z_7$    | 895.4129  | 895.4066  | -7.0 |
| $z_8$    | 982.4449  | 982.4484  | 3.6  |
| $z_9$    | 1145.5083 | 1145.5103 | 1.7  |
| $z_{11}$ | 1341.6294 | 1341.6312 | 1.3  |
| $z_{12}$ | 1428.6615 | 1428.6582 | -2.3 |
| $z_{13}$ | 1527.7299 | 1527.7295 | -0.3 |
| $z_{15}$ | 1787.8460 | 1787.8423 | -2.1 |

**Table S17:** Complete list of ions generated by EThcD of a tryptic peptide from TAB1 glycoprotein using 50 ms ETD and 25% supplemental energy to activate the peptide (VYPVSVYPYS<sub>(g)</sub>SAQSTSK, 2+, m/z 951.97). The fragment ions that are critical for localization of GlcNAc sites are listed in blue font.

| Identified Ions                | Theoretical m/z | Observed m/z | Mass Error (ppm) |
|--------------------------------|-----------------|--------------|------------------|
| b <sub>2</sub>                 | 263.1390        | 263.1390     | 0.0              |
| b <sub>3</sub>                 | 360.1918        | 360.1917     | -0.3             |
| b <sub>4</sub>                 | 459.2602        | 459.2602     | 0.0              |
| b <sub>5</sub>                 | 546.2922        | 546.2923     | 0.2              |
| b <sub>6</sub>                 | 645.3606        | 645.3607     | 0.2              |
| b <sub>7</sub>                 | 742.4134        | 742.4092     | -5.7             |
| b <sub>8</sub>                 | 905.4767        | 905.4782     | 1.7              |
| c <sub>9</sub>                 | 1212.6147       | 1212.6122    | -2.1             |
| c <sub>10</sub>                | 1299.6467       | 1299.6456    | -0.8             |
| c <sub>11</sub>                | 1370.6838       | 1370.6874    | 2.6              |
| c <sub>12</sub>                | 1498.7424       | 1498.7385    | -2.6             |
| c <sub>15</sub>                | 1773.8541       | 1773.8507    | -1.9             |
| Y <sub>1</sub>                 | 147.1128        | 147.1128     | 0.0              |
| Y <sub>2</sub>                 | 234.1448        | 234.1446     | -0.9             |
| Y <sub>3</sub>                 | 335.1925        | 335.1924     | -0.3             |
| Y <sub>4</sub>                 | 422.2245        | 422.2238     | -1.7             |
| Y <sub>5</sub>                 | 550.2831        | 550.2828     | -0.5             |
| Y <sub>6</sub>                 | 621.3202        | 621.3186     | -2.6             |
| Y <sub>7</sub>                 | 708.3523        | 708.3528     | 0.7              |
| Y <sub>7</sub> <sup>▲</sup>    | 708.3523        | 708.3538     | 2.1              |
| Y <sub>8</sub>                 | 998.4637        | 998.4664     | 2.7              |
| Y <sub>8</sub> <sup>▲</sup>    | 795.3843        | 795.3853     | 1.3              |
| Y <sub>9</sub>                 | 1161.5270       | 1161.5270    | 0.0              |
| Y <sub>10</sub>                | 1258.5798       | 1258.5801    | 0.2              |
| Y <sub>10</sub> <sup>▲</sup>   | 1055.5004       | 1055.5005    | 0.1              |
| Y <sub>11</sub>                | 1357.6482       | 1357.6494    | 0.9              |
| Y <sub>11</sub> <sup>▲</sup>   | 1154.5688       | 1154.5697    | 0.8              |
| Y <sub>12</sub>                | 1444.6802       | 1444.6805    | 0.2              |
| Y <sub>12</sub> <sup>▲</sup>   | 1241.6008       | 1241.6022    | 1.1              |
| Y <sub>13</sub>                | 1543.7486       | 1543.7490    | 0.3              |
| Y <sub>14</sub> <sup>▲</sup>   | 1437.7220       | 1437.7240    | 1.4              |
| Y <sub>14</sub>                | 1640.8014       | 1640.8007    | -0.4             |
| Y <sub>10</sub> <sup>2+</sup>  | 629.7935        | 629.7947     | 1.9              |
| Y <sub>11</sub> <sup>2+</sup>  | 679.3277        | 679.3300     | 3.4              |
| Y <sub>14</sub> <sup>2+</sup>  | 820.9043        | 820.9044     | 0.1              |
| Y <sub>14</sub> <sup>2+▲</sup> | 719.3646        | 719.3646     | 0.0              |
| Y <sub>15</sub> <sup>2+</sup>  | 902.4360        | 902.4369     | 1.0              |
| Y <sub>15</sub> <sup>2+▲</sup> | 800.8963        | 800.8969     | 0.7              |

|          |           |           |      |
|----------|-----------|-----------|------|
| $z_7$    | 692.3335  | 692.3344  | 1.3  |
| $z_9$    | 1145.5083 | 1145.5133 | 4.4  |
| $z_{11}$ | 1341.6294 | 1341.6324 | 2.2  |
| $z_{12}$ | 1428.6615 | 1428.6699 | 5.9  |
| $z_{13}$ | 1527.7299 | 1527.7269 | -2.0 |
| $z_{15}$ | 1787.8460 | 1787.8439 | -1.2 |

**Table S18:** Complete list of ions generated by EThcD of a tryptic peptide from TAB1 glycoprotein using 50 ms ETD and 25% supplemental energy to activate the peptide (VYPVSVPYSSAQS<sub>(g)</sub>TSK, 2+, m/z 951.97). The fragment ions that are critical for localization of GlcNAc sites are listed in blue font.

| Identified Ions                | Theoretical m/z | Observed m/z | Mass Error (ppm) |
|--------------------------------|-----------------|--------------|------------------|
| b <sub>2</sub>                 | 263.1390        | 263.1389     | -0.4             |
| b <sub>3</sub>                 | 360.1918        | 360.1917     | -0.3             |
| b <sub>4</sub>                 | 459.2602        | 459.2599     | -0.7             |
| b <sub>5</sub>                 | 546.2922        | 546.2920     | -0.4             |
| b <sub>6</sub>                 | 645.3606        | 645.3605     | -0.2             |
| b <sub>7</sub>                 | 742.4134        | 742.4145     | 1.5              |
| b <sub>8</sub>                 | 905.4767        | 905.4750     | -1.9             |
| b <sub>9</sub>                 | 992.5087        | 992.5079     | -0.8             |
| b <sub>12</sub>                | 1278.6365       | 1278.6403    | 3.0              |
| c <sub>12</sub>                | 1295.6630       | 1295.6610    | -1.5             |
| c <sub>13</sub>                | 1585.7744       | 1585.7743    | -0.1             |
| c <sub>15</sub>                | 1773.8541       | 1773.8518    | -1.3             |
| Y <sub>1</sub>                 | 147.1128        | 147.1126     | -1.4             |
| Y <sub>2</sub>                 | 234.1448        | 234.1446     | -0.9             |
| Y <sub>3</sub>                 | 335.1925        | 335.1927     | 0.6              |
| Y <sub>4</sub>                 | 625.3039        | 625.3065     | 4.2              |
| Y <sub>4</sub> <sup>▲</sup>    | 422.2245        | 422.2250     | 1.2              |
| Y <sub>5</sub>                 | 753.3625        | 753.3661     | 4.8              |
| Y <sub>6</sub>                 | 824.3996        | 824.4019     | 2.8              |
| Y <sub>6</sub> <sup>▲</sup>    | 621.3202        | 621.3210     | 1.3              |
| Y <sub>7</sub>                 | 911.4316        | 911.4299     | -1.9             |
| Y <sub>7</sub> <sup>▲</sup>    | 708.3523        | 708.3538     | 2.1              |
| Y <sub>8</sub>                 | 998.4637        | 998.4656     | 1.9              |
| Y <sub>9</sub>                 | 1161.5270       | 1161.5299    | 2.5              |
| Y <sub>10</sub>                | 1258.5798       | 1258.5797    | -0.1             |
| Y <sub>10</sub> <sup>▲</sup>   | 1055.5004       | 1055.5005    | 0.1              |
| Y <sub>11</sub>                | 1357.6482       | 1357.6481    | -0.1             |
| Y <sub>11</sub> <sup>▲</sup>   | 1154.5688       | 1154.5697    | 0.8              |
| Y <sub>12</sub>                | 1444.6802       | 1444.6801    | -0.1             |
| Y <sub>12</sub> <sup>▲</sup>   | 1241.6008       | 1241.6022    | 1.1              |
| Y <sub>13</sub>                | 1543.7486       | 1543.7502    | 1.0              |
| Y <sub>14</sub>                | 1640.8014       | 1640.8046    | 2.0              |
| Y <sub>14</sub> <sup>▲</sup>   | 1437.7220       | 1437.7240    | 1.4              |
| Y <sub>15</sub> <sup>▲</sup>   | 1600.7853       | 1600.7840    | -0.8             |
| Y <sub>10</sub> <sup>2+</sup>  | 629.7935        | 629.7933     | -0.3             |
| Y <sub>11</sub> <sup>2+</sup>  | 679.3277        | 679.3251     | -3.8             |
| Y <sub>14</sub> <sup>2+</sup>  | 820.9043        | 820.9042     | -0.1             |
| Y <sub>14</sub> <sup>2+▲</sup> | 719.3646        | 719.3646     | 0.0              |

|                             |           |           |      |
|-----------------------------|-----------|-----------|------|
| $Y_{15}^{2+}$               | 902.4360  | 902.4358  | -0.2 |
| $Y_{15}^{2+\blacktriangle}$ | 800.8963  | 800.8969  | 0.7  |
| $Z_5$                       | 737.3438  | 737.3425  | -1.8 |
| $Z_6$                       | 808.3809  | 808.3851  | 5.2  |
| $Z_7$                       | 895.4129  | 895.4124  | -0.6 |
| $Z_8$                       | 982.4449  | 982.4487  | 3.9  |
| $Z_9$                       | 1145.5083 | 1145.5057 | -2.3 |
| $Z_{11}$                    | 1341.6294 | 1341.6299 | 0.4  |
| $Z_{12}$                    | 1428.6615 | 1428.6534 | -5.7 |
| $Z_{13}$                    | 1527.7299 | 1527.7290 | -0.6 |
| $Z_{15}$                    | 1787.8460 | 1787.8477 | 1.0  |

**Table S19:** Complete list of ions generated by EThcD of a tryptic peptide from TAB1 glycoprotein using 50 ms ETD and 25% supplemental energy to activate the peptide (LWSVDHGEQSVVT<sub>(g)</sub>AP, 2+, *m/z* 914.43). The fragment ions that are critical for localization of GlcNAc sites are listed in blue font.

| Identified Ions                | Theoretical <i>m/z</i> | Observed <i>m/z</i> | Mass Error (ppm) |
|--------------------------------|------------------------|---------------------|------------------|
| b <sub>2</sub>                 | 300.1706               | 300.1707            | 0.3              |
| b <sub>6</sub>                 | 738.3569               | 738.3556            | -1.8             |
| b <sub>8</sub>                 | 924.4210               | 924.4221            | 1.2              |
| b <sub>9</sub>                 | 1052.4796              | 1052.4814           | 1.7              |
| b <sub>10</sub>                | 1139.5116              | 1139.5183           | 5.9              |
| b <sub>11</sub>                | 1238.5800              | 1238.5812           | 1.0              |
| b <sub>12</sub>                | 1337.6484              | 1337.6488           | 0.3              |
| b <sub>14</sub> <sup>▲</sup>   | 1509.7332              | 1509.7334           | 0.1              |
| c <sub>6</sub>                 | 755.3835               | 755.3799            | -4.8             |
| c <sub>7</sub>                 | 812.4049               | 812.4052            | 0.4              |
| c <sub>8</sub>                 | 941.4475               | 941.4412            | -6.7             |
| c <sub>9</sub>                 | 1069.5061              | 1069.5055           | -0.6             |
| c <sub>10</sub>                | 1156.5381              | 1156.5386           | 0.4              |
| c <sub>11</sub>                | 1255.6066              | 1255.6151           | 6.8              |
| c <sub>12</sub>                | 1354.6750              | 1354.6748           | -0.1             |
| c <sub>13</sub>                | 1658.8020              | 1658.7994           | -1.6             |
| y <sub>1</sub>                 | 116.0706               | 116.0707            | 0.9              |
| y <sub>2</sub>                 | 187.1077               | 187.1078            | 0.5              |
| y <sub>3</sub>                 | 491.2348               | 491.2333            | -3.1             |
| y <sub>3</sub> <sup>▲</sup>    | 288.1554               | 288.1555            | 0.2              |
| y <sub>4</sub> <sup>▲</sup>    | 387.2238               | 387.2239            | 0.1              |
| y <sub>5</sub> <sup>▲</sup>    | 486.2922               | 486.2942            | 4.0              |
| y <sub>11</sub>                | 1342.6121              | 1342.6097           | -1.8             |
| y <sub>11</sub> <sup>2+▲</sup> | 570.2700               | 570.2700            | -0.1             |
| y <sub>12</sub> <sup>2+▲</sup> | 619.8042               | 619.7997            | -7.3             |
| y <sub>13</sub>                | 1528.7125              | 1528.7189           | 4.2              |
| z <sub>11</sub>                | 1326.5934              | 1326.5957           | 1.7              |
| z <sub>12</sub>                | 1425.6618              | 1425.6713           | 6.7              |
| z <sub>13</sub>                | 1512.6938              | 1512.6932           | -0.4             |
| z <sub>14</sub>                | 1698.7731              | 1698.7721           | -0.6             |

**Table S20:** Complete list of ions generated by UVPD of a tryptic peptide from TAB1 glycoprotein using two pulse of 1.5 mJ laser energy to activate the peptide (GSS<sub>(g)</sub>HHHHHHSSGLVPR, 4+,  $m/z$  493.73). The fragment ions that are critical for localization of GlcNAc sites are listed in blue font.

| Identified Ions               | Theoretical $m/z$ | Observed $m/z$ | Mass Error (ppm) |
|-------------------------------|-------------------|----------------|------------------|
| a <sub>3</sub>                | 407.1773          | 407.1763       | -2.5             |
| a <sub>4</sub>                | 544.2362          | 544.2322       | -7.3             |
| a <sub>5</sub>                | 681.2951          | 681.2953       | 0.3              |
| a <sub>6</sub>                | 818.3540          | 818.3542       | 0.2              |
| a <sub>7</sub>                | 955.4129          | 955.4185       | 5.9              |
| a <sub>6</sub> <sup>2+</sup>  | 409.1770          | 409.1774       | 1.0              |
| a <sub>7</sub> <sup>2+</sup>  | 477.7064          | 477.7083       | 4.0              |
| a <sub>8</sub> <sup>2+</sup>  | 546.2359          | 546.2378       | 3.5              |
| a <sub>9</sub> <sup>2+</sup>  | 614.7654          | 614.7598       | -9.1             |
| b <sub>4</sub> <sup>▲</sup>   | 369.1517          | 369.1510       | -1.9             |
| b <sub>5</sub> <sup>▲</sup>   | 506.2106          | 506.2105       | -0.1             |
| b <sub>6</sub> <sup>▲</sup>   | 643.2695          | 643.2671       | -3.7             |
| b <sub>7</sub> <sup>▲</sup>   | 780.3284          | 780.3276       | -1.0             |
| b <sub>8</sub> <sup>▲</sup>   | 917.3874          | 917.3854       | -2.1             |
| b <sub>3</sub> <sup>2+</sup>  | 218.0897          | 218.0901       | 1.8              |
| b <sub>8</sub> <sup>2+</sup>  | 560.7370          | 560.7370       | 0.0              |
| b <sub>9</sub> <sup>2+</sup>  | 629.2665          | 629.2726       | 9.7              |
| b <sub>12</sub> <sup>2+</sup> | 744.8092          | 744.8125       | 4.4              |
| b <sub>13</sub> <sup>2+</sup> | 801.3512          | 801.3527       | 1.9              |
| b <sub>14</sub> <sup>2+</sup> | 850.8854          | 850.8862       | 0.9              |
| b <sub>15</sub> <sup>3+</sup> | 599.9436          | 599.9446       | 1.7              |
| c <sub>2</sub>                | 162.0873          | 162.0875       | 1.2              |
| c <sub>3</sub>                | 452.1987          | 452.2015       | 6.2              |
| c <sub>13</sub> <sup>2+</sup> | 809.8645          | 809.8692       | 5.8              |
| x <sub>1</sub>                | 201.0982          | 201.0983       | 0.5              |
| x <sub>3</sub>                | 397.2194          | 397.2187       | -1.8             |
| x <sub>4</sub>                | 510.3034          | 510.3056       | 4.3              |
| x <sub>5</sub>                | 567.3249          | 567.3256       | 1.2              |
| x <sub>6</sub>                | 654.3569          | 654.3579       | 1.5              |
| x <sub>7</sub>                | 741.3890          | 741.3914       | 3.2              |
| x <sub>8</sub>                | 878.4479          | 878.4503       | 2.7              |
| x <sub>8</sub> <sup>2+</sup>  | 439.7276          | 439.7288       | 2.7              |
| x <sub>9</sub> <sup>2+</sup>  | 508.2570          | 508.2571       | 0.2              |
| x <sub>10</sub> <sup>2+</sup> | 576.7865          | 576.7892       | 4.7              |
| x <sub>11</sub> <sup>2+</sup> | 645.3159          | 645.3174       | 2.3              |
| y <sub>1</sub>                | 175.1190          | 175.1191       | 0.6              |
| y <sub>2</sub>                | 272.1717          | 272.1721       | 1.5              |
| y <sub>3</sub>                | 371.2401          | 371.2402       | 0.3              |



|                               |           |           |      |
|-------------------------------|-----------|-----------|------|
| Y <sub>4</sub>                | 484.3242  | 484.3237  | -1.0 |
| Y <sub>5</sub>                | 541.3456  | 541.3462  | 1.1  |
| Y <sub>6</sub>                | 628.3777  | 628.3785  | 1.3  |
| Y <sub>7</sub>                | 715.4097  | 715.4105  | 1.1  |
| Y <sub>8</sub>                | 852.4686  | 852.4694  | 0.9  |
| Y <sub>9</sub>                | 989.5275  | 989.5294  | 1.9  |
| Y <sub>10</sub>               | 1126.5864 | 1126.5869 | 0.4  |
| Y <sub>6</sub> <sup>2+</sup>  | 314.6925  | 314.6919  | -1.9 |
| Y <sub>7</sub> <sup>2+</sup>  | 358.2085  | 358.2079  | -1.7 |
| Y <sub>8</sub> <sup>2+</sup>  | 426.7379  | 426.7383  | 0.9  |
| Y <sub>9</sub> <sup>2+</sup>  | 495.2674  | 495.2644  | -6.1 |
| Y <sub>10</sub> <sup>2+</sup> | 563.7969  | 563.7969  | 0.0  |
| Y <sub>11</sub> <sup>2+</sup> | 632.3263  | 632.3264  | 0.2  |
| Y <sub>12</sub> <sup>2+</sup> | 700.8558  | 700.8565  | 1.0  |
| Y <sub>13</sub> <sup>2+</sup> | 769.3852  | 769.3868  | 2.1  |
| Y <sub>14</sub> <sup>2+</sup> | 914.4409  | 914.4399  | -1.1 |
| Z <sub>1</sub>                | 159.1002  | 159.1004  | 1.3  |
| Z <sub>2</sub>                | 256.1530  | 256.1538  | 3.1  |
| Z <sub>3</sub>                | 355.2214  | 355.2215  | 0.3  |
| Z <sub>4</sub>                | 468.3055  | 468.3070  | 3.2  |
| Z <sub>5</sub>                | 525.3269  | 525.3280  | 2.1  |
| Z <sub>6</sub>                | 612.3589  | 612.3578  | -1.8 |
| Z <sub>7</sub>                | 699.3910  | 699.3900  | -1.4 |
| Z <sub>8</sub>                | 836.4499  | 836.4489  | -1.2 |
| Z <sub>9</sub>                | 973.5088  | 973.5038  | -5.1 |
| Z <sub>8</sub> <sup>2+</sup>  | 418.7286  | 418.7259  | -6.4 |
| Z <sub>9</sub> <sup>2+</sup>  | 487.2580  | 487.2592  | 2.5  |
| Z <sub>10</sub> <sup>2+</sup> | 555.7875  | 555.7879  | 0.7  |
| Z <sub>11</sub> <sup>2+</sup> | 624.3169  | 624.3182  | 2.1  |
| Z <sub>12</sub> <sup>2+</sup> | 692.8464  | 692.8455  | -1.3 |

**Table S21:** Complete list of ions generated by UVPD of a tryptic peptide from TAB1 glycoprotein using two pulse of 1.5 mJ laser energy to activate the peptide (GSSHHHHHS<sub>(g)</sub>SGLVPR, 4+,  $m/z$  493.73). The fragment ions that are critical for localization of GlcNAc sites are listed in blue font.

| Identified Ions | Theoretical $m/z$ | Observed $m/z$ | Mass Error (ppm) |
|-----------------|-------------------|----------------|------------------|
| $z_4$           | 341.1568          | 341.1585       | 5.0              |
| $z_5$           | 478.2157          | 478.2175       | 3.8              |
| $z_6$           | 615.2746          | 615.2782       | 5.9              |
| $z_7$           | 752.3335          | 752.3380       | 6.0              |
| $z_8$           | 889.3924          | 889.3973       | 5.5              |
| $b_3$           | 232.0928          | 232.0945       | 7.3              |
| $b_4$           | 369.1517          | 369.1534       | 4.6              |
| $b_5$           | 506.2106          | 506.2119       | 2.6              |
| $b_6$           | 643.2695          | 643.2731       | 5.6              |
| $b_7$           | 780.3284          | 780.3334       | 6.4              |
| $b_8$           | 917.3873          | 917.3928       | 6.0              |
| $b_6^{2+}$      | 322.1384          | 322.1399       | 4.7              |
| $b_7^{2+}$      | 390.6679          | 390.6681       | 0.5              |
| $b_8^{2+}$      | 459.1973          | 459.1995       | 4.8              |
| $b_9^{2+}$      | 527.7268          | 527.7297       | 5.5              |
| $b_{12}^{2+}$   | 744.8092          | 744.8111       | 2.6              |
| $b_{13}^{2+}$   | 801.3512          | 801.3561       | 6.1              |
| $b_{14}^{2+}$   | 850.8854          | 850.8901       | 5.5              |
| $b_{15}^{3+}$   | 599.9436          | 599.9461       | 4.2              |
| $c_3$           | 249.1193          | 249.1196       | 1.2              |
| $c_4$           | 386.1783          | 386.1801       | 4.7              |
| $c_6$           | 660.2961          | 660.2983       | 3.3              |
| $c_7$           | 797.3550          | 797.3581       | 3.9              |
| $c_6^{2+}$      | 330.6517          | 330.6528       | 3.3              |
| $c_7^{2+}$      | 399.1811          | 399.1860       | 12.3             |
| $c_8^{2+}$      | 467.7106          | 467.7093       | -2.8             |
| $c_9^{2+}$      | 536.2400          | 536.2419       | 3.5              |
| $c_{10}^{2+}$   | 681.2957          | 681.2999       | 6.2              |
| $c_{13}^{2+}$   | 809.8645          | 809.8698       | 6.5              |
| $x_1$           | 201.0982          | 201.0990       | 4.0              |
| $x_3$           | 397.2194          | 397.2222       | 7.0              |
| $x_4$           | 510.3034          | 510.3035       | 0.2              |
| $x_5$           | 567.3249          | 567.3287       | 6.7              |
| $x_6$           | 654.3569          | 654.3594       | 3.8              |
| $x_9^{2+}$      | 609.7967          | 609.8019       | 8.5              |
| $x_{10}^{2+}$   | 678.3262          | 678.3271       | 1.3              |
| $y_1$           | 175.1190          | 175.1197       | 4.0              |
| $y_2$           | 272.1717          | 272.1731       | 5.1              |

|                             |           |           |      |
|-----------------------------|-----------|-----------|------|
| $Y_3$                       | 371.2401  | 371.2422  | 5.7  |
| $Y_4$                       | 484.3242  | 484.3267  | 5.2  |
| $Y_5$                       | 541.3456  | 541.3477  | 3.9  |
| $Y_6$                       | 628.3777  | 628.3809  | 5.1  |
| $Y_7$                       | 918.4891  | 918.4933  | 4.6  |
| $Y_7^{\blacktriangle}$      | 715.4097  | 715.4141  | 6.1  |
| $Y_8^{\blacktriangle}$      | 852.4686  | 852.4741  | 6.5  |
| $Y_9^{\blacktriangle}$      | 989.5275  | 989.5335  | 6.1  |
| $Y_{10}^{\blacktriangle}$   | 1126.5826 | 1126.5925 | 8.8  |
| $Y_6^{2+}$                  | 314.6925  | 314.6943  | 5.7  |
| $Y_9^{2+}$                  | 596.8071  | 596.8091  | 3.4  |
| $Y_{11}^{2+\blacktriangle}$ | 632.3263  | 632.3305  | 6.7  |
| $Y_{12}^{2+\blacktriangle}$ | 700.8558  | 700.8596  | 5.4  |
| $Z_1$                       | 159.1002  | 159.1010  | 5.0  |
| $Z_2$                       | 256.1530  | 256.1507  | -9.0 |
| $Z_3$                       | 355.2214  | 355.2231  | 4.8  |
| $Z_4$                       | 468.3055  | 468.3071  | 3.4  |
| $Z_5$                       | 525.3269  | 525.3303  | 6.5  |
| $Z_6$                       | 612.3589  | 612.3626  | 6.0  |
| $Z_7$                       | 902.4703  | 902.4740  | 4.1  |
| $Z_8$                       | 1039.5293 | 1039.5345 | 5.0  |
| $Z_8^{2+}$                  | 520.2683  | 520.2722  | 7.5  |
| $Z_9^{2+}$                  | 588.7977  | 588.7988  | 1.9  |
| $Z_{10}^{2+}$               | 657.3272  | 657.3303  | 4.7  |
| $Z_{11}^{2+}$               | 725.8566  | 725.8628  | 8.5  |

**Table S22:** Complete list of ions generated by UVPD of a tryptic peptide from TAB1 glycoprotein using two pulse of 1.5 mJ laser energy to activate the peptide (LSEFPILGASTEVPMS<sub>(g)</sub>LPVQAAISAPSP-LAMPLGSPSVALPTLAPLSVVTSGAAPK, 5+, *m/z* 1188.24). The fragment ions that are critical for localization of GlcNAc sites are listed in blue font.

| Identified Ions               | Theoretical <i>m/z</i> | Observed <i>m/z</i> | Mass Error (ppm) |
|-------------------------------|------------------------|---------------------|------------------|
| a <sub>2</sub>                | 173.1285               | 173.1286            | 0.6              |
| a <sub>3</sub>                | 302.1710               | 302.1712            | 0.7              |
| a <sub>4</sub>                | 389.2031               | 389.2032            | 0.3              |
| a <sub>5</sub>                | 536.2715               | 536.2720            | 0.9              |
| a <sub>6</sub>                | 633.3242               | 633.3235            | -1.1             |
| a <sub>7</sub>                | 746.4083               | 746.4067            | -2.1             |
| a <sub>8</sub>                | 859.4924               | 859.4941            | 2.0              |
| a <sub>10</sub>               | 987.5509               | 987.5492            | -1.7             |
| a <sub>11</sub>               | 1074.5830              | 1074.5873           | 4.0              |
| a <sub>12</sub>               | 1175.6306              | 1175.6359           | 4.5              |
| a <sub>13</sub>               | 1304.6732              | 1304.6765           | 2.5              |
| a <sub>14</sub>               | 1403.7416              | 1403.7434           | 1.3              |
| a <sub>15</sub>               | 1500.7944              | 1500.8040           | 6.4              |
| a <sub>16</sub>               | 1597.8472              | 1597.8594           | 7.6              |
| a <sub>17</sub>               | 1728.8876              | 1728.9029           | 8.8              |
| a <sub>7</sub> <sup>2+</sup>  | 373.2042               | 373.2054            | 3.2              |
| a <sub>17</sub> <sup>2+</sup> | 864.4438               | 864.4491            | 6.1              |
| a <sub>24</sub> <sup>2+</sup> | 1299.1685              | 1299.1811           | 9.7              |
| a <sub>25</sub> <sup>2+</sup> | 1355.7106              | 1355.7218           | 8.3              |
| a <sub>31</sub> <sup>3+</sup> | 1088.9114              | 1088.9159           | 4.1              |
| a <sub>35</sub> <sup>3+</sup> | 1226.3162              | 1226.3181           | 1.5              |
| a <sub>36</sub> <sup>3+</sup> | 1245.3234              | 1245.3320           | 6.9              |
| a <sub>38</sub> <sup>3+</sup> | 1306.6850              | 1306.6853           | 0.2              |
| a <sub>39</sub> <sup>3+</sup> | 1344.3797              | 1344.3806           | 0.7              |
| a <sub>43</sub> <sup>3+</sup> | 1467.7869              | 1467.7858           | -0.7             |
| a <sub>46</sub> <sup>3+</sup> | 1571.5150              | 1571.5120           | -1.9             |
| a <sub>47</sub> <sup>3+</sup> | 1595.1941              | 1595.1934           | -0.4             |
| a <sub>48</sub> <sup>3+</sup> | 1627.5450              | 1627.5548           | 6.0              |
| b <sub>2</sub>                | 201.1234               | 201.1236            | 1.0              |
| b <sub>3</sub>                | 330.1660               | 330.1661            | 0.3              |
| b <sub>4</sub>                | 417.1980               | 417.1981            | 0.2              |
| b <sub>5</sub>                | 564.2664               | 564.2670            | 1.1              |
| b <sub>6</sub>                | 661.3192               | 661.3195            | 0.5              |
| b <sub>7</sub>                | 774.4032               | 774.4040            | 1.0              |
| b <sub>8</sub>                | 887.4873               | 887.4888            | 1.7              |
| b <sub>9</sub>                | 944.5087               | 944.4995            | -9.7             |
| b <sub>10</sub>               | 1015.5458              | 1015.5410           | -4.7             |
| b <sub>11</sub>               | 1102.5779              | 1102.5861           | 7.4              |

|               |           |           |      |
|---------------|-----------|-----------|------|
| $b_{13}$      | 1332.6681 | 1332.6674 | -0.5 |
| $b_{14}$      | 1431.7366 | 1431.7400 | 2.4  |
| $b_{15}$      | 1528.7893 | 1528.8032 | 9.1  |
| $b_{17}$      | 1756.8826 | 1756.8800 | -1.5 |
| $b_{18}$      | 2046.9940 | 2046.9943 | 0.1  |
| $b_{19}$      | 2160.0781 | 2160.0776 | -0.2 |
| $b_{13}^{2+}$ | 666.8377  | 666.8400  | 3.4  |
| $b_{14}^{2+}$ | 716.3719  | 716.3727  | 1.1  |
| $b_{15}^{2+}$ | 764.8983  | 764.8980  | -0.4 |
| $b_{17}^{2+}$ | 878.9449  | 878.9419  | -3.4 |
| $b_{24}^{2+}$ | 1313.6696 | 1313.6801 | 8.0  |
| $b_{26}^{2+}$ | 1413.7277 | 1413.7278 | 0.1  |
| $b_{27}^{2+}$ | 1449.2462 | 1449.2454 | -0.6 |
| $b_{31}^{2+}$ | 1646.3570 | 1646.3612 | 2.6  |
| $b_{33}^{2+}$ | 1747.3958 | 1747.3976 | 1.0  |
| $b_{27}^{3+}$ | 966.4999  | 966.5000  | 0.1  |
| $b_{31}^{3+}$ | 1097.9071 | 1097.9133 | 5.6  |
| $b_{33}^{3+}$ | 1165.2663 | 1165.2710 | 4.0  |
| $b_{35}^{3+}$ | 1235.3119 | 1235.3191 | 5.8  |
| $b_{36}^{3+}$ | 1254.3191 | 1254.3250 | 4.7  |
| $b_{37}^{3+}$ | 1283.3297 | 1283.3337 | 3.1  |
| $b_{42}^{3+}$ | 1439.0879 | 1439.0799 | -5.6 |
| $b_{43}^{3+}$ | 1476.7826 | 1476.7811 | -1.0 |
| $b_{46}^{3+}$ | 1580.5107 | 1580.5129 | 1.4  |
| $b_{47}^{3+}$ | 1604.1898 | 1604.2002 | 6.5  |
| $b_{47}^{4+}$ | 1203.3941 | 1203.3834 | -8.9 |
| $b_{49}^{4+}$ | 1255.9283 | 1255.9383 | 8.0  |
| $b_{51}^{4+}$ | 1302.4535 | 1302.4447 | -6.8 |
| $b_{52}^{4+}$ | 1327.2206 | 1327.2335 | 9.7  |
| $b_{53}^{4+}$ | 1352.4825 | 1352.4911 | 6.4  |
| $b_{54}^{4+}$ | 1374.2405 | 1374.2537 | 9.6  |
| $b_{55}^{4+}$ | 1388.4959 | 1388.4821 | -9.9 |
| $b_{56}^{4+}$ | 1406.2551 | 1406.2518 | -2.4 |
| $c_2$         | 218.1499  | 218.1502  | 1.4  |
| $c_3$         | 347.1925  | 347.1927  | 0.6  |
| $c_4$         | 434.2245  | 434.2249  | 0.9  |
| $c_6$         | 678.3457  | 678.3464  | 1.0  |
| $c_7$         | 791.4298  | 791.4298  | 0.0  |
| $c_8$         | 904.5138  | 904.5126  | -1.3 |
| $c_9$         | 961.5353  | 961.5359  | 0.6  |
| $c_{10}$      | 1032.5724 | 1032.5810 | 8.3  |
| $c_{11}$      | 1119.6044 | 1119.6071 | 2.4  |

|                               |           |           |      |
|-------------------------------|-----------|-----------|------|
| C <sub>13</sub>               | 1349.6947 | 1349.7010 | 4.7  |
| C <sub>15</sub>               | 1545.8159 | 1545.8308 | 9.6  |
| C <sub>16</sub>               | 1642.8686 | 1642.8708 | 1.3  |
| X <sub>1</sub>                | 173.0921  | 173.0923  | 1.2  |
| X <sub>3</sub>                | 341.1819  | 341.1820  | 0.3  |
| X <sub>4</sub>                | 412.2190  | 412.2182  | -1.9 |
| X <sub>5</sub>                | 469.2405  | 469.2387  | -3.8 |
| X <sub>6</sub>                | 556.2725  | 556.2752  | 4.9  |
| X <sub>8</sub>                | 756.3886  | 756.3885  | -0.1 |
| X <sub>10</sub>               | 942.4891  | 942.4977  | 9.1  |
| X <sub>11</sub>               | 1055.5731 | 1055.5651 | -7.6 |
| X <sub>12</sub>               | 1152.6259 | 1152.6350 | 7.9  |
| X <sub>14</sub>               | 1336.7471 | 1336.7428 | -3.2 |
| X <sub>16</sub>               | 1534.8475 | 1534.8620 | 9.4  |
| X <sub>11</sub> <sup>2+</sup> | 528.2902  | 528.2852  | -9.5 |
| X <sub>13</sub> <sup>2+</sup> | 612.3351  | 612.3369  | 2.9  |
| X <sub>15</sub> <sup>2+</sup> | 719.4010  | 719.3974  | -5.0 |
| X <sub>16</sub> <sup>2+</sup> | 767.9274  | 767.9350  | 9.9  |
| X <sub>17</sub> <sup>2+</sup> | 824.4694  | 824.4738  | 5.3  |
| X <sub>18</sub> <sup>2+</sup> | 859.9880  | 859.9898  | 2.1  |
| X <sub>19</sub> <sup>2+</sup> | 909.5222  | 909.5237  | 1.6  |
| X <sub>21</sub> <sup>2+</sup> | 1009.5802 | 1009.5804 | 0.2  |
| X <sub>29</sub> <sup>2+</sup> | 1392.7826 | 1392.7760 | -4.7 |
| X <sub>32</sub> <sup>2+</sup> | 1533.3514 | 1533.3423 | -5.9 |
| X <sub>35</sub> <sup>2+</sup> | 1668.9280 | 1668.9292 | 0.7  |
| Y <sub>2</sub>                | 244.1656  | 244.1657  | 0.4  |
| Y <sub>3</sub>                | 315.2027  | 315.2029  | 0.6  |
| Y <sub>4</sub>                | 386.2398  | 386.2398  | 0.0  |
| Y <sub>5</sub>                | 443.2612  | 443.2617  | 1.1  |
| Y <sub>6</sub>                | 530.2933  | 530.2939  | 1.1  |
| Y <sub>7</sub>                | 631.3410  | 631.3420  | 1.6  |
| Y <sub>8</sub>                | 730.4094  | 730.4102  | 1.1  |
| Y <sub>9</sub>                | 829.4778  | 829.4799  | 2.5  |
| Y <sub>10</sub>               | 916.5098  | 916.5114  | 1.7  |
| Y <sub>11</sub>               | 1029.5939 | 1029.6013 | 7.2  |
| Y <sub>12</sub>               | 1126.6466 | 1126.6495 | 2.6  |
| Y <sub>13</sub>               | 1197.6837 | 1197.6866 | 2.4  |
| Y <sub>14</sub>               | 1310.7678 | 1310.7751 | 5.6  |
| Y <sub>16</sub>               | 1508.8682 | 1508.8724 | 2.8  |
| Y <sub>17</sub>               | 1621.9523 | 1621.9584 | 3.8  |
| Y <sub>18</sub>               | 1692.9894 | 1692.9963 | 4.1  |
| Y <sub>19</sub>               | 1792.0578 | 1792.0530 | -2.7 |
| Y <sub>12</sub> <sup>2+</sup> | 563.8269  | 563.8265  | -0.7 |
| Y <sub>13</sub> <sup>2+</sup> | 599.3455  | 599.3452  | -0.5 |
| Y <sub>14</sub> <sup>2+</sup> | 655.8875  | 655.8860  | -2.3 |

|                               |           |           |      |
|-------------------------------|-----------|-----------|------|
| Y <sub>15</sub> <sup>2+</sup> | 706.4114  | 706.4107  | -1.0 |
| Y <sub>16</sub> <sup>2+</sup> | 754.9378  | 754.9382  | 0.5  |
| Y <sub>17</sub> <sup>2+</sup> | 811.4798  | 811.4810  | 1.5  |
| Y <sub>18</sub> <sup>2+</sup> | 846.9983  | 846.9995  | 1.4  |
| Y <sub>19</sub> <sup>2+</sup> | 896.5325  | 896.5341  | 1.8  |
| Y <sub>20</sub> <sup>2+</sup> | 940.0486  | 940.0494  | 0.9  |
| Y <sub>21</sub> <sup>2+</sup> | 996.5906  | 996.5960  | 5.4  |
| Y <sub>22</sub> <sup>2+</sup> | 1045.1170 | 1045.1173 | 0.3  |
| Y <sub>23</sub> <sup>2+</sup> | 1088.6330 | 1088.6360 | 2.8  |
| Y <sub>24</sub> <sup>2+</sup> | 1117.1437 | 1117.1459 | 2.0  |
| Y <sub>26</sub> <sup>2+</sup> | 1222.2121 | 1222.2144 | 1.9  |
| Y <sub>27</sub> <sup>2+</sup> | 1287.7324 | 1287.7372 | 3.7  |
| Y <sub>28</sub> <sup>2+</sup> | 1323.2509 | 1323.2594 | 6.4  |
| Y <sub>30</sub> <sup>2+</sup> | 1428.3193 | 1428.3134 | -4.1 |
| Y <sub>31</sub> <sup>2+</sup> | 1471.8353 | 1471.8455 | 6.9  |
| Y <sub>32</sub> <sup>2+</sup> | 1520.3617 | 1520.3689 | 4.7  |
| Y <sub>33</sub> <sup>2+</sup> | 1555.8803 | 1555.8871 | 4.4  |
| Y <sub>34</sub> <sup>2+</sup> | 1599.3963 | 1599.4034 | 4.4  |
| Y <sub>35</sub> <sup>2+</sup> | 1655.9383 | 1655.9492 | 6.6  |
| Y <sub>36</sub> <sup>2+</sup> | 1691.4569 | 1691.4501 | -4.0 |
| Y <sub>22</sub> <sup>3+</sup> | 697.0804  | 697.0795  | -1.3 |
| Y <sub>23</sub> <sup>3+</sup> | 726.0911  | 726.0924  | 1.8  |
| Y <sub>24</sub> <sup>3+</sup> | 745.0982  | 745.0974  | -1.1 |
| Y <sub>26</sub> <sup>3+</sup> | 815.1438  | 815.1429  | -1.1 |
| Y <sub>28</sub> <sup>3+</sup> | 882.5030  | 882.5063  | 3.7  |
| Y <sub>29</sub> <sup>3+</sup> | 920.1977  | 920.1969  | -0.9 |
| Y <sub>30</sub> <sup>3+</sup> | 952.5486  | 952.5484  | -0.2 |
| Y <sub>31</sub> <sup>3+</sup> | 981.5593  | 981.5632  | 4.0  |
| Y <sub>34</sub> <sup>3+</sup> | 1066.6000 | 1066.6025 | 2.3  |
| Y <sub>35</sub> <sup>3+</sup> | 1104.2946 | 1104.2988 | 3.8  |
| Y <sub>36</sub> <sup>3+</sup> | 1127.9737 | 1127.9654 | -7.4 |
| Y <sub>40</sub> <sup>3+</sup> | 1259.7126 | 1259.7192 | 5.2  |
| Y <sub>45</sub> <sup>3+</sup> | 1502.4931 | 1502.5030 | 6.6  |
| Y <sub>40</sub> <sup>4+</sup> | 945.0363  | 945.0372  | 1.0  |
| Y <sub>43</sub> <sup>4+</sup> | 1078.5953 | 1078.5879 | -6.9 |
| Y <sub>49</sub> <sup>4+</sup> | 1231.1693 | 1231.1653 | -3.2 |
| Y <sub>50</sub> <sup>4+</sup> | 1248.9286 | 1248.9260 | -2.1 |
| Y <sub>52</sub> <sup>4+</sup> | 1291.4550 | 1291.4600 | 3.9  |
| Y <sub>53</sub> <sup>4+</sup> | 1319.7260 | 1319.7250 | -0.8 |
| Y <sub>57</sub> <sup>4+</sup> | 1434.7750 | 1434.7640 | -7.7 |

|               |           |           |      |
|---------------|-----------|-----------|------|
| $z_3$         | 299.1839  | 299.1842  | 1.0  |
| $z_4$         | 370.2211  | 370.2213  | 0.5  |
| $z_5$         | 427.2425  | 427.2431  | 1.4  |
| $z_6$         | 514.2745  | 514.2751  | 1.2  |
| $z_7$         | 615.3222  | 615.3226  | 0.7  |
| $z_8$         | 714.3906  | 714.3907  | 0.1  |
| $z_9$         | 813.4590  | 813.4580  | -1.2 |
| $z_{10}$      | 900.4911  | 900.4889  | -2.4 |
| $z_{11}$      | 1013.5751 | 1013.5754 | 0.3  |
| $z_{13}$      | 1181.6650 | 1181.6555 | -8.0 |
| $z_{10}^{2+}$ | 450.7492  | 450.7490  | -0.4 |
| $z_{11}^{2+}$ | 507.2912  | 507.2911  | -0.2 |
| $z_{13}^{2+}$ | 591.3361  | 591.3364  | 0.5  |
| $z_{14}^{2+}$ | 647.8782  | 647.8788  | 0.9  |
| $z_{17}^{2+}$ | 803.4704  | 803.4714  | 1.2  |
| $z_{18}^{2+}$ | 838.9890  | 838.9901  | 1.3  |
| $z_{19}^{2+}$ | 888.5232  | 888.5313  | 9.1  |
| $z_{20}^{2+}$ | 932.0392  | 932.0414  | 2.4  |
| $z_{21}^{2+}$ | 988.5812  | 988.5760  | -5.3 |
| $z_{22}^{2+}$ | 1037.1076 | 1037.1077 | 0.1  |
| $z_{25}^{2+}$ | 1165.6764 | 1165.6782 | 1.5  |
| $z_{28}^{2+}$ | 1315.2416 | 1315.2292 | -9.4 |
| $z_{30}^{2+}$ | 1420.3100 | 1420.2990 | -7.7 |
| $z_{31}^{2+}$ | 1463.8260 | 1463.8142 | -8.1 |
| $z_{32}^{2+}$ | 1512.3524 | 1512.3625 | 6.7  |
| $z_{34}^{2+}$ | 1591.3869 | 1591.3914 | 2.8  |



**Table S23:** Complete list of ions generated by UVPD of a tryptic peptide from TAB1 glycoprotein using two pulse of 1.5 mJ laser energy to activate the peptide (LSEFPILGASTEVPMSLPVQAAIS<sub>(g)</sub>APSP-LAMPLGSPLSVALPTLAPLSVVTSGAAPK, 5+, m/z 1188.24). The fragment ions that are critical for localization of GlcNAc sites are listed in blue font.

| Identified Ions               | Theoretical m/z | Observed m/z | Mass Error (ppm) |
|-------------------------------|-----------------|--------------|------------------|
| a <sub>2</sub>                | 173.1285        | 173.1284     | -0.6             |
| a <sub>3</sub>                | 302.1710        | 302.1707     | -1.0             |
| a <sub>4</sub>                | 389.2031        | 389.2021     | -2.6             |
| a <sub>5</sub>                | 536.2715        | 536.2697     | -3.4             |
| a <sub>7</sub>                | 746.4083        | 746.4058     | -3.3             |
| a <sub>8</sub>                | 859.4924        | 859.4971     | 5.5              |
| a <sub>10</sub>               | 987.5509        | 987.5500     | -0.9             |
| a <sub>13</sub>               | 1304.6732       | 1304.6812    | 6.1              |
| a <sub>14</sub>               | 1403.7416       | 1403.7388    | -2.0             |
| a <sub>15</sub>               | 1500.7944       | 1500.7982    | 2.5              |
| a <sub>17</sub>               | 1728.8876       | 1728.8846    | -1.7             |
| a <sub>7</sub> <sup>2+</sup>  | 373.2042        | 373.2078     | 9.6              |
| a <sub>12</sub> <sup>2+</sup> | 587.8153        | 587.8176     | 3.9              |
| a <sub>17</sub> <sup>2+</sup> | 864.4438        | 864.4445     | 0.8              |
| a <sub>43</sub> <sup>3+</sup> | 1467.7869       | 1467.7894    | 1.7              |
| b <sub>2</sub>                | 201.1234        | 201.1233     | -0.5             |
| b <sub>3</sub>                | 330.1660        | 330.1657     | -0.9             |
| b <sub>4</sub>                | 417.1980        | 417.1978     | -0.5             |
| b <sub>5</sub>                | 564.2664        | 564.2660     | -0.7             |
| b <sub>7</sub>                | 774.4032        | 774.4025     | -0.9             |
| b <sub>8</sub>                | 887.4873        | 887.4873     | 0.0              |
| b <sub>9</sub>                | 944.5087        | 944.5046     | -4.3             |
| b <sub>10</sub>               | 1015.5458       | 1015.5406    | -5.1             |
| b <sub>11</sub>               | 1102.5779       | 1102.5780    | 0.1              |
| b <sub>12</sub>               | 1203.6256       | 1203.6189    | -5.6             |
| b <sub>13</sub>               | 1332.6681       | 1332.6660    | -1.6             |
| b <sub>14</sub>               | 1431.7366       | 1431.7366    | 0.0              |
| b <sub>15</sub>               | 1528.7893       | 1528.7870    | -1.5             |
| b <sub>17</sub>               | 1756.8826       | 1756.8792    | -1.9             |
| b <sub>6</sub> <sup>2+</sup>  | 331.1632        | 331.1661     | 8.8              |
| b <sub>13</sub> <sup>2+</sup> | 666.8377        | 666.8378     | 0.1              |
| b <sub>14</sub> <sup>2+</sup> | 716.3719        | 716.3705     | -2.0             |
| b <sub>15</sub> <sup>2+</sup> | 764.8983        | 764.9037     | 7.1              |
| b <sub>19</sub> <sup>2+</sup> | 979.0030        | 979.0051     | 2.1              |
| b <sub>23</sub> <sup>2+</sup> | 1176.6114       | 1176.6038    | -6.5             |
| b <sub>24</sub> <sup>2+</sup> | 1212.1299       | 1212.1295    | -0.3             |
| b <sub>25</sub> <sup>2+</sup> | 1268.6720       | 1268.6687    | -2.6             |
| b <sub>26</sub> <sup>2+</sup> | 1413.7277       | 1413.7269    | -0.6             |

|               |           |           |      |
|---------------|-----------|-----------|------|
| $b_{27}^{2+}$ | 1449.2462 | 1449.2455 | -0.5 |
| $b_{31}^{2+}$ | 1646.3570 | 1646.3560 | -0.6 |
| $b_{33}^{2+}$ | 1747.3958 | 1747.3933 | -1.4 |
| $b_{33}^{3+}$ | 1165.2663 | 1165.2571 | -7.9 |
| $b_{37}^{3+}$ | 1283.3297 | 1283.3235 | -4.8 |
| $b_{41}^{3+}$ | 1415.4088 | 1415.4190 | 7.2  |
| $b_{43}^{3+}$ | 1476.7826 | 1476.7703 | -8.3 |
| $b_{46}^{3+}$ | 1580.5107 | 1580.4990 | -7.4 |
| $b_{56}^{4+}$ | 1406.2551 | 1406.2515 | -2.6 |
| $c_2$         | 218.1499  | 218.1499  | 0.0  |
| $c_3$         | 347.1925  | 347.1922  | -0.9 |
| $c_4$         | 434.2245  | 434.2239  | -1.4 |
| $c_8$         | 904.5138  | 904.5212  | 8.2  |
| $c_{10}$      | 1032.5724 | 1032.5804 | 7.7  |
| $c_{11}$      | 1119.6044 | 1119.6082 | 3.4  |
| $c_{13}$      | 1349.6947 | 1349.7020 | 5.4  |
| $c_{15}$      | 1545.8159 | 1545.8146 | -0.8 |
| $c_7^{2+}$    | 396.2185  | 396.2222  | 9.3  |
| $c_{14}^{2+}$ | 724.8852  | 724.8831  | -2.9 |
| $c_{18}^{2+}$ | 930.9742  | 930.9804  | 6.7  |
| $c_{20}^{2+}$ | 1036.0426 | 1036.0503 | 7.4  |
| $x_1$         | 173.0921  | 173.0921  | 0.0  |
| $x_2$         | 270.1448  | 270.1447  | -0.4 |
| $x_3$         | 341.1819  | 341.1813  | -1.8 |
| $x_4$         | 412.2190  | 412.2199  | 2.2  |
| $x_5$         | 469.2405  | 469.2404  | -0.2 |
| $x_6$         | 556.2725  | 556.2749  | 4.3  |
| $x_8$         | 756.3886  | 756.3837  | -6.5 |
| $x_9$         | 855.4570  | 855.4510  | -7.0 |
| $x_{11}$      | 1055.5731 | 1055.5685 | -4.4 |
| $x_{14}$      | 1336.7471 | 1336.7351 | -9.0 |
| $x_{15}$      | 1437.7947 | 1437.7878 | -4.8 |
| $x_{16}$      | 1534.8475 | 1534.8614 | 9.1  |
| $x_{13}^{2+}$ | 612.3351  | 612.3365  | 2.3  |
| $x_{15}^{2+}$ | 719.4010  | 719.3943  | -9.3 |
| $x_{21}^{2+}$ | 1009.5802 | 1009.5767 | -3.5 |
| $y_2$         | 244.1656  | 244.1653  | -1.2 |
| $y_3$         | 315.2027  | 315.2023  | -1.3 |
| $y_4$         | 386.2398  | 386.2395  | -0.8 |
| $y_5$         | 443.2612  | 443.2610  | -0.5 |
| $y_6$         | 530.2933  | 530.2932  | -0.2 |
| $y_7$         | 631.3410  | 631.3406  | -0.6 |
| $y_8$         | 730.4094  | 730.4091  | -0.4 |
| $y_9$         | 829.4778  | 829.4816  | 4.6  |

|                               |           |           |      |
|-------------------------------|-----------|-----------|------|
| Y <sub>10</sub>               | 916.5098  | 916.5115  | 1.9  |
| Y <sub>11</sub>               | 1029.5939 | 1029.5975 | 3.5  |
| Y <sub>12</sub>               | 1126.6466 | 1126.6462 | -0.4 |
| Y <sub>13</sub>               | 1197.6837 | 1197.6860 | 1.9  |
| Y <sub>14</sub>               | 1310.7678 | 1310.7698 | 1.5  |
| Y <sub>15</sub>               | 1411.8155 | 1411.8184 | 2.1  |
| Y <sub>16</sub>               | 1508.8682 | 1508.8688 | 0.4  |
| Y <sub>17</sub>               | 1621.9523 | 1621.9541 | 1.1  |
| Y <sub>18</sub>               | 1692.9894 | 1692.9904 | 0.6  |
| Y <sub>19</sub>               | 1792.0578 | 1792.0706 | 7.1  |
| Y <sub>12</sub> <sup>2+</sup> | 563.8269  | 563.8263  | -1.1 |
| Y <sub>13</sub> <sup>2+</sup> | 599.3455  | 599.3422  | -5.5 |
| Y <sub>14</sub> <sup>2+</sup> | 655.8875  | 655.8853  | -3.4 |
| Y <sub>15</sub> <sup>2+</sup> | 706.4114  | 706.4102  | -1.7 |
| Y <sub>16</sub> <sup>2+</sup> | 754.9378  | 754.9374  | -0.5 |
| Y <sub>17</sub> <sup>2+</sup> | 811.4798  | 811.4797  | -0.1 |
| Y <sub>18</sub> <sup>2+</sup> | 846.9983  | 846.9983  | 0.0  |
| Y <sub>19</sub> <sup>2+</sup> | 896.5325  | 896.5338  | 1.5  |
| Y <sub>20</sub> <sup>2+</sup> | 940.0486  | 940.0466  | -2.1 |
| Y <sub>21</sub> <sup>2+</sup> | 996.5906  | 996.5842  | -6.4 |
| Y <sub>22</sub> <sup>2+</sup> | 1045.1170 | 1045.1163 | -0.7 |
| Y <sub>23</sub> <sup>2+</sup> | 1088.6330 | 1088.6371 | 3.8  |
| Y <sub>24</sub> <sup>2+</sup> | 1117.1437 | 1117.1443 | 0.5  |
| Y <sub>25</sub> <sup>2+</sup> | 1173.6857 | 1173.6941 | 7.2  |
| Y <sub>26</sub> <sup>2+</sup> | 1222.2121 | 1222.2129 | 0.7  |
| Y <sub>27</sub> <sup>2+</sup> | 1287.7324 | 1287.7338 | 1.1  |
| Y <sub>28</sub> <sup>2+</sup> | 1323.2509 | 1323.2544 | 2.6  |
| Y <sub>30</sub> <sup>2+</sup> | 1428.3193 | 1428.3226 | 2.3  |
| Y <sub>31</sub> <sup>2+</sup> | 1471.8353 | 1471.8447 | 6.4  |
| Y <sub>32</sub> <sup>2+</sup> | 1520.3617 | 1520.3630 | 0.9  |
| Y <sub>33</sub> <sup>2+</sup> | 1555.8803 | 1555.8866 | 4.0  |
| Y <sub>22</sub> <sup>3+</sup> | 697.0804  | 697.0797  | -1.0 |
| Y <sub>26</sub> <sup>3+</sup> | 815.1438  | 815.1423  | -1.8 |
| Y <sub>30</sub> <sup>3+</sup> | 952.5486  | 952.5470  | -1.7 |
| Y <sub>31</sub> <sup>3+</sup> | 981.5593  | 981.5654  | 6.2  |
| Y <sub>33</sub> <sup>3+</sup> | 1037.5893 | 1037.5894 | 0.1  |
| Y <sub>34</sub> <sup>3+</sup> | 1134.2931 | 1134.2943 | 1.1  |
| Y <sub>35</sub> <sup>3+</sup> | 1171.9878 | 1171.9781 | -8.3 |
| Y <sub>57</sub> <sup>4+</sup> | 1434.7750 | 1434.7818 | 4.7  |
| Z <sub>3</sub>                | 299.1839  | 299.1841  | 0.7  |
| Z <sub>4</sub>                | 370.2211  | 370.2209  | -0.5 |
| Z <sub>5</sub>                | 427.2425  | 427.2417  | -1.9 |

|               |           |           |      |
|---------------|-----------|-----------|------|
| $z_6$         | 514.2745  | 514.2740  | -1.0 |
| $z_7$         | 615.3222  | 615.3193  | -4.7 |
| $z_8$         | 714.3906  | 714.3903  | -0.4 |
| $z_9$         | 813.4590  | 813.4521  | -8.5 |
| $z_{10}$      | 900.4911  | 900.4858  | -5.9 |
| $z_{11}$      | 1013.5751 | 1013.5757 | 0.6  |
| $z_{13}$      | 1181.6650 | 1181.6600 | -4.2 |
| $z_7^{2+}$    | 308.1648  | 308.1651  | 1.0  |
| $z_{10}^{2+}$ | 450.7492  | 450.7477  | -3.3 |
| $z_{11}^{2+}$ | 507.2912  | 507.2917  | 1.0  |
| $z_{13}^{2+}$ | 591.3361  | 591.3341  | -3.4 |
| $z_{14}^{2+}$ | 647.8782  | 647.8779  | -0.5 |
| $z_{15}^{2+}$ | 698.4020  | 698.3998  | -3.2 |
| $z_{17}^{2+}$ | 803.4704  | 803.4717  | 1.6  |
| $z_{18}^{2+}$ | 838.9890  | 838.9891  | 0.1  |
| $z_{21}^{2+}$ | 988.5812  | 988.5867  | 5.6  |

**Table S24:** Complete list of ions generated by UVPD of a tryptic peptide from TAB1 glycoprotein using two pulse of 1.5 mJ laser energy to activate the peptide (SSEVNGTDRPPIS<sub>(g)</sub>SWSVDDVSNFIR, 3+, m/z 989.80). The fragment ions that are critical for localization of GlcNAc sites are listed in blue font.

| Identified Ions               | Theoretical m/z | Observed m/z | Mass Error (ppm) |
|-------------------------------|-----------------|--------------|------------------|
| a <sub>3</sub>                | 276.1190        | 276.1191     | 0.4              |
| a <sub>4</sub>                | 375.1874        | 375.1872     | -0.5             |
| a <sub>5</sub>                | 489.2304        | 489.2309     | 1.0              |
| a <sub>8</sub>                | 762.3264        | 762.3265     | 0.1              |
| a <sub>9</sub>                | 918.4275        | 918.4253     | -2.4             |
| a <sub>10</sub>               | 1015.4803       | 1015.4777    | -2.6             |
| a <sub>11</sub>               | 1112.5331       | 1112.5260    | -6.4             |
| a <sub>12</sub>               | 1225.6171       | 1225.6254    | 6.8              |
| a <sub>6</sub> <sup>2+</sup>  | 273.1259        | 273.1264     | 1.8              |
| b <sub>2</sub>                | 175.0713        | 175.0712     | -0.6             |
| b <sub>3</sub>                | 304.1139        | 304.1135     | -1.3             |
| b <sub>4</sub>                | 403.1823        | 403.1819     | -1.0             |
| b <sub>5</sub>                | 517.2253        | 517.2254     | 0.2              |
| b <sub>6</sub>                | 574.2467        | 574.2477     | 1.7              |
| b <sub>7</sub>                | 675.2944        | 675.2928     | -2.4             |
| b <sub>8</sub>                | 790.3213        | 790.3232     | 2.4              |
| b <sub>9</sub>                | 946.4225        | 946.4194     | -3.3             |
| b <sub>12</sub>               | 1253.6120       | 1253.6173    | 4.2              |
| b <sub>13</sub>               | 1543.7234       | 1543.7310    | 4.9              |
| b <sub>14</sub>               | 1630.7555       | 1630.7710    | 9.5              |
| b <sub>9</sub> <sup>2+</sup>  | 473.7149        | 473.7148     | -0.2             |
| b <sub>10</sub> <sup>2+</sup> | 522.2412        | 522.2418     | 1.1              |
| b <sub>12</sub> <sup>2+</sup> | 627.3097        | 627.3082     | -2.4             |
| b <sub>24</sub> <sup>2+</sup> | 1397.1461       | 1397.1532    | 5.1              |
| c <sub>2</sub>                | 192.0979        | 192.0976     | -1.6             |
| c <sub>3</sub>                | 321.1405        | 321.1397     | -2.5             |
| c <sub>4</sub>                | 420.2089        | 420.2090     | 0.2              |
| c <sub>5</sub>                | 534.2518        | 534.2526     | 1.5              |
| c <sub>6</sub>                | 591.2733        | 591.2723     | -1.7             |
| c <sub>7</sub>                | 692.3210        | 692.3201     | -1.3             |
| c <sub>8</sub>                | 807.3479        | 807.3432     | -5.8             |
| c <sub>9</sub>                | 963.4490        | 963.4566     | 7.9              |
| c <sub>12</sub>               | 1270.6386       | 1270.6400    | 1.1              |
| c <sub>13</sub>               | 1560.7500       | 1560.7491    | -0.6             |
| c <sub>14</sub>               | 1647.7820       | 1647.7827    | 0.4              |
| x <sub>1</sub>                | 201.0982        | 201.0981     | -0.5             |
| x <sub>2</sub>                | 314.1823        | 314.1817     | -1.9             |
| x <sub>3</sub>                | 461.2507        | 461.2506     | -0.2             |
| x <sub>4</sub>                | 575.2936        | 575.2935     | -0.2             |
| x <sub>5</sub>                | 662.3256        | 662.3259     | 0.5              |

|                                |           |           |      |
|--------------------------------|-----------|-----------|------|
| X <sub>6</sub>                 | 761.3941  | 761.3940  | -0.1 |
| X <sub>7</sub>                 | 876.4210  | 876.4251  | 4.7  |
| X <sub>8</sub>                 | 991.4479  | 991.4454  | -2.5 |
| X <sub>10</sub>                | 1177.5484 | 1177.5498 | 1.2  |
| X <sub>12</sub>                | 1450.6597 | 1450.6720 | 8.5  |
| X <sub>13</sub>                | 1740.7711 | 1740.7800 | 5.1  |
| X <sub>17</sub> <sup>2+</sup>  | 1102.5345 | 1102.5316 | -2.6 |
| X <sub>19</sub> <sup>2+</sup>  | 1210.5719 | 1210.5729 | 0.8  |
| X <sub>20</sub> <sup>2+</sup>  | 1239.0826 | 1239.0807 | -1.5 |
| X <sub>21</sub> <sup>2+</sup>  | 1296.1040 | 1296.1071 | 2.4  |
| X <sub>22</sub> <sup>2+</sup>  | 1345.6383 | 1345.6353 | -2.2 |
| X <sub>23</sub> <sup>2+</sup>  | 1410.1595 | 1410.1670 | 5.3  |
| Y <sub>1</sub>                 | 175.1190  | 175.1188  | -1.1 |
| Y <sub>2</sub>                 | 288.2030  | 288.2027  | -1.0 |
| Y <sub>3</sub>                 | 435.2714  | 435.2708  | -1.4 |
| Y <sub>4</sub>                 | 549.3144  | 549.3137  | -1.3 |
| Y <sub>5</sub>                 | 636.3464  | 636.3457  | -1.1 |
| Y <sub>6</sub>                 | 735.4148  | 735.4142  | -0.8 |
| Y <sub>7</sub>                 | 850.4417  | 850.4413  | -0.5 |
| Y <sub>8</sub>                 | 965.4687  | 965.4680  | -0.7 |
| Y <sub>9</sub>                 | 1064.5371 | 1064.5355 | -1.5 |
| Y <sub>11</sub>                | 1337.6484 | 1337.6487 | 0.2  |
| Y <sub>12</sub>                | 1424.6805 | 1424.6775 | -2.1 |
| Y <sub>13</sub>                | 1714.7919 | 1714.7876 | -2.5 |
| Y <sub>13</sub> <sup>▲</sup>   | 1511.7125 | 1511.7133 | 0.5  |
| Y <sub>11</sub> <sup>2+</sup>  | 669.3278  | 669.3319  | 6.1  |
| Y <sub>13</sub> <sup>2+</sup>  | 857.8996  | 857.8997  | 0.1  |
| Y <sub>16</sub> <sup>2+</sup>  | 1011.4944 | 1011.4911 | -3.3 |
| Y <sub>17</sub> <sup>2+</sup>  | 1089.5449 | 1089.5427 | -2.0 |
| Y <sub>17</sub> <sup>2+▲</sup> | 988.0052  | 988.0082  | 3.0  |
| Y <sub>18</sub> <sup>2+</sup>  | 1147.0584 | 1147.0538 | -4.0 |
| Y <sub>18</sub> <sup>2+▲</sup> | 1045.5187 | 1045.5215 | 2.7  |
| Y <sub>19</sub> <sup>2+▲</sup> | 1096.0425 | 1096.0392 | -3.0 |
| Y <sub>20</sub> <sup>2+▲</sup> | 1124.5533 | 1124.5481 | -4.6 |
| Y <sub>21</sub> <sup>2+▲</sup> | 1181.5747 | 1181.5858 | 9.4  |
| Y <sub>21</sub> <sup>2+</sup>  | 1283.1144 | 1283.1165 | 1.6  |
| Y <sub>22</sub> <sup>2+</sup>  | 1332.6486 | 1332.6423 | -4.7 |
| Y <sub>22</sub> <sup>2+▲</sup> | 1231.1090 | 1231.1139 | 4.0  |
| Z <sub>2</sub>                 | 272.1843  | 272.1840  | -1.1 |
| Z <sub>3</sub>                 | 419.2527  | 419.2520  | -1.7 |
| Z <sub>4</sub>                 | 533.2956  | 533.2942  | -2.6 |
| Z <sub>5</sub>                 | 620.3277  | 620.3262  | -2.4 |
| Z <sub>6</sub>                 | 719.3961  | 719.3939  | -3.1 |

|          |           |           |      |
|----------|-----------|-----------|------|
| $z_7$    | 834.4230  | 834.4173  | -6.8 |
| $z_8$    | 949.4499  | 949.4485  | -1.5 |
| $z_{10}$ | 1135.5504 | 1135.5460 | -3.9 |
| $z_{11}$ | 1321.6297 | 1321.6205 | -7.0 |
| $z_{12}$ | 1408.6617 | 1408.6622 | 0.4  |

---

**Table S25:** Complete list of ions generated by EThcD of a tryptic peptide from Ph1 glycoprotein using 50 ms ETD and 25% supplemental energy to activate the peptide (GSSHHHHHHS<sub>(g)</sub>SGLVPR, 4+, m/z 493.73). The fragment ions that are critical for localization of GlcNAc sites are listed in blue font.

| Identified Ions                | Theoretical Mass | Observed Mass | Mass Error (ppm) |
|--------------------------------|------------------|---------------|------------------|
| b <sub>5</sub>                 | 506.2106         | 506.2112      | 1.2              |
| b <sub>7</sub>                 | 780.3284         | 780.3329      | 5.8              |
| b <sub>8</sub> <sup>2+</sup>   | 459.1973         | 459.1996      | 5.0              |
| b <sub>9</sub> <sup>2+</sup>   | 527.7268         | 527.7278      | 1.9              |
| c <sub>4</sub>                 | 386.1783         | 386.1778      | -1.3             |
| c <sub>5</sub>                 | 523.2372         | 523.2363      | -1.7             |
| c <sub>6</sub>                 | 660.2961         | 660.2950      | -1.7             |
| c <sub>7</sub>                 | 797.3550         | 797.3523      | -3.4             |
| c <sub>8</sub> <sup>2+</sup>   | 467.7106         | 467.7113      | 1.5              |
| c <sub>9</sub> <sup>2+</sup>   | 536.2400         | 536.2391      | -1.7             |
| c <sub>10</sub> <sup>2+</sup>  | 681.2957         | 681.2936      | -3.1             |
| c <sub>11</sub> <sup>2+</sup>  | 724.8118         | 724.8126      | 1.1              |
| c <sub>12</sub> <sup>2+</sup>  | 753.3225         | 753.3207      | -2.4             |
| c <sub>13</sub> <sup>2+</sup>  | 809.8645         | 809.8663      | 2.2              |
| c <sub>15</sub> <sup>2+</sup>  | 907.9251         | 907.9266      | 1.7              |
| Y <sub>2</sub>                 | 272.1717         | 272.1713      | -1.5             |
| Y <sub>5</sub>                 | 541.3456         | 541.3416      | -7.4             |
| Y <sub>6</sub>                 | 628.3777         | 628.3768      | -1.4             |
| Y <sub>7</sub> <sup>▲</sup>    | 715.4097         | 715.4075      | -3.1             |
| Y <sub>8</sub> <sup>▲</sup>    | 852.4686         | 852.4691      | 0.5              |
| Y <sub>8</sub> <sup>2+▲</sup>  | 426.7380         | 426.7377      | -0.8             |
| Y <sub>9</sub> <sup>2+▲</sup>  | 495.2674         | 495.2686      | 2.3              |
| Y <sub>10</sub> <sup>2+▲</sup> | 563.7969         | 563.7963      | -1.1             |
| Y <sub>11</sub> <sup>2+▲</sup> | 632.3263         | 632.3290      | 4.3              |
| Y <sub>15</sub> <sup>2+</sup>  | 957.9569         | 957.9496      | -7.6             |
| Z <sub>6</sub>                 | 612.3589         | 612.3563      | -4.2             |
| Z <sub>7</sub>                 | 902.4703         | 902.4720      | 1.9              |
| Z <sub>8</sub>                 | 1039.5293        | 1039.5297     | 0.4              |
| Z <sub>10</sub> <sup>2+</sup>  | 657.3272         | 657.3287      | 2.3              |
| Z <sub>12</sub> <sup>2+</sup>  | 794.3861         | 794.3862      | 0.1              |
| Z <sub>13</sub> <sup>2+</sup>  | 862.9155         | 862.9128      | -3.1             |



**Table S26:** Complete list of ions generated by EThcD of a tryptic peptide from Ph1 glycoprotein using 50 ms ETD and 25% supplemental energy to activate the peptide (LSEFPILGASTEVPMS<sub>(g)</sub>LPVQ AAISAPSLAMPLGSPSVALPTLAPLSVVTSGAAPK, 5+, *m/z* 1188.24). The fragment ions that are critical for localization of GlcNAc sites are listed in blue font.

| Identified Ions               | Theoretical <i>m/z</i> | Observed <i>m/z</i> | Mass Error (ppm) |
|-------------------------------|------------------------|---------------------|------------------|
| b <sub>2</sub>                | 201.1234               | 201.1236            | 1.0              |
| b <sub>4</sub>                | 417.1980               | 417.1990            | 2.4              |
| b <sub>5</sub>                | 564.2664               | 564.2670            | 1.1              |
| b <sub>7</sub>                | 774.4032               | 774.4053            | 2.7              |
| b <sub>8</sub>                | 887.4873               | 887.4870            | -0.3             |
| b <sub>9</sub>                | 944.5087               | 944.5119            | 3.4              |
| b <sub>10</sub>               | 1015.5458              | 1015.5461           | 0.3              |
| b <sub>12</sub>               | 1203.6256              | 1203.6387           | 10.9             |
| b <sub>13</sub>               | 1332.6681              | 1332.6656           | -1.9             |
| b <sub>14</sub>               | 1431.7366              | 1431.7362           | -0.3             |
| b <sub>24</sub> <sup>2+</sup> | 1313.6696              | 1313.6777           | 6.2              |
| b <sub>25</sub> <sup>2+</sup> | 1370.2117              | 1370.2126           | 0.7              |
| b <sub>26</sub> <sup>2+</sup> | 1413.7277              | 1413.7212           | -4.6             |
| b <sub>31</sub> <sup>2+</sup> | 1646.3570              | 1646.3518           | -3.2             |
| c <sub>3</sub>                | 347.1925               | 347.1926            | 0.3              |
| c <sub>4</sub>                | 434.2245               | 434.2238            | -1.6             |
| c <sub>6</sub>                | 678.3457               | 678.3471            | 2.1              |
| c <sub>7</sub>                | 791.4298               | 791.4313            | 1.9              |
| c <sub>8</sub>                | 904.5138               | 904.5111            | -3.0             |
| c <sub>9</sub>                | 961.5353               | 961.5326            | -2.8             |
| c <sub>10</sub>               | 1032.5724              | 1032.5743           | 1.8              |
| c <sub>11</sub>               | 1119.6044              | 1119.6035           | -0.8             |
| c <sub>12</sub>               | 1220.6521              | 1220.6475           | -3.8             |
| y <sub>1</sub>                | 147.1128               | 147.1126            | -1.4             |
| y <sub>2</sub>                | 244.1656               | 244.1654            | -0.8             |
| y <sub>3</sub>                | 315.2027               | 315.2024            | -1.0             |
| y <sub>4</sub>                | 386.2398               | 386.2357            | -10.6            |
| y <sub>5</sub>                | 443.2612               | 443.2608            | -0.9             |
| y <sub>6</sub>                | 530.2933               | 530.2952            | 3.6              |
| y <sub>7</sub>                | 631.3410               | 631.3420            | 1.6              |
| y <sub>8</sub>                | 730.4094               | 730.4095            | 0.1              |
| y <sub>9</sub>                | 829.4778               | 829.4715            | -7.6             |
| y <sub>10</sub>               | 916.5098               | 916.5112            | 1.5              |
| y <sub>12</sub>               | 1126.6466              | 1126.6462           | -0.4             |
| y <sub>13</sub>               | 1197.6837              | 1197.6819           | -1.5             |
| y <sub>14</sub>               | 1310.7678              | 1310.7688           | 0.8              |
| y <sub>15</sub>               | 1411.8155              | 1411.8010           | -10.3            |
| y <sub>16</sub>               | 1508.8682              | 1508.8679           | -0.2             |
| y <sub>17</sub>               | 1621.9523              | 1621.9426           | -6.0             |

|               |           |           |      |
|---------------|-----------|-----------|------|
| $Y_{18}$      | 1692.9894 | 1692.9816 | -4.6 |
| $Y_{12}^{2+}$ | 563.8269  | 563.8272  | 0.5  |
| $Y_{16}^{2+}$ | 754.9378  | 754.9376  | -0.3 |
| $Y_{17}^{2+}$ | 811.4798  | 811.4783  | -1.8 |
| $Y_{18}^{2+}$ | 846.9983  | 846.9935  | -5.7 |
| $Y_{22}^{2+}$ | 1045.1170 | 1045.1129 | -3.9 |
| $Y_{24}^{2+}$ | 1117.1437 | 1117.1415 | -2.0 |
| $Y_{26}^{2+}$ | 1222.2121 | 1222.2117 | -0.3 |
| $Y_{27}^{2+}$ | 1287.7324 | 1287.7374 | 3.9  |
| $Y_{28}^{2+}$ | 1323.2509 | 1323.2511 | 0.2  |
| $Y_{30}^{2+}$ | 1428.3193 | 1428.3143 | -3.5 |
| $Y_{32}^{2+}$ | 1520.3617 | 1520.3646 | 1.9  |
| $Y_{33}^{2+}$ | 1555.8803 | 1555.8899 | 6.2  |
| $Y_{34}^{2+}$ | 1599.3963 | 1599.3969 | 0.4  |
| $Z_3$         | 299.1839  | 299.1835  | -1.3 |
| $Z_4$         | 370.2211  | 370.2210  | -0.3 |
| $Z_6$         | 514.2745  | 514.2732  | -2.5 |
| $Z_7$         | 615.3222  | 615.3186  | -5.9 |
| $Z_{17}$      | 1605.9336 | 1605.9177 | -9.9 |
| $Z_{17}^{2+}$ | 803.4704  | 803.4708  | 0.5  |
| $Z_{31}^{2+}$ | 1463.8260 | 1463.8190 | -4.8 |
| $Z_{34}^{2+}$ | 1591.3869 | 1591.3899 | 1.9  |

---

**Table S27:** Complete list of ions generated by EThcD of a tryptic peptide from Ph1 glycoprotein using 50 ms ETD and 25% supplemental energy to activate the peptide (SSEVNGTDRPPIS<sub>(g)</sub>SWSVDDVSNFIR, 3+, m/z 989.80). The fragment ions that are critical for localization of GlcNAc sites are listed in blue font.

| Identified Ions                | Theoretical m/z | Observed m/z | Mass Error (ppm) |
|--------------------------------|-----------------|--------------|------------------|
| b <sub>2</sub>                 | 175.0713        | 175.0717     | 2.3              |
| b <sub>3</sub>                 | 304.1139        | 304.1138     | -0.3             |
| b <sub>4</sub>                 | 403.1823        | 403.1824     | 0.2              |
| b <sub>5</sub>                 | 517.2253        | 517.2246     | -1.4             |
| b <sub>6</sub>                 | 574.2467        | 574.248      | 2.3              |
| b <sub>7</sub>                 | 675.2944        | 675.2939     | -0.7             |
| b <sub>9</sub>                 | 946.4225        | 946.4227     | 0.2              |
| b <sub>12</sub>                | 1253.612        | 1253.6106    | -1.1             |
| c <sub>6</sub>                 | 591.2733        | 591.2773     | 6.8              |
| c <sub>7</sub>                 | 692.321         | 692.3225     | 2.2              |
| c <sub>11</sub>                | 1157.5545       | 1157.5541    | -0.3             |
| c <sub>12</sub>                | 1270.6386       | 1270.6384    | -0.2             |
| c <sub>13</sub>                | 1560.75         | 1560.7474    | -1.7             |
| c <sub>14</sub>                | 1647.782        | 1647.7845    | 1.5              |
| Y <sub>1</sub>                 | 175.119         | 175.1187     | -1.7             |
| Y <sub>2</sub>                 | 288.203         | 288.2032     | 0.7              |
| Y <sub>3</sub>                 | 435.2714        | 435.2709     | -1.1             |
| Y <sub>4</sub>                 | 549.3144        | 549.3159     | 2.7              |
| Y <sub>5</sub>                 | 636.3464        | 636.3458     | -0.9             |
| Y <sub>6</sub>                 | 735.4148        | 735.4141     | -1               |
| Y <sub>7</sub>                 | 850.4417        | 850.4415     | -0.2             |
| Y <sub>8</sub>                 | 965.4687        | 965.4685     | -0.2             |
| Y <sub>9</sub>                 | 1064.5371       | 1064.5372    | 0.1              |
| Y <sub>10</sub>                | 1151.5691       | 1151.569     | -0.1             |
| Y <sub>11</sub>                | 1337.6484       | 1337.651     | 1.9              |
| Y <sub>12</sub>                | 1424.6805       | 1424.682     | 1.1              |
| Y <sub>13</sub> <sup>▲</sup>   | 1511.7125       | 1511.7133    | 0.5              |
| Y <sub>11</sub> <sup>2+</sup>  | 669.3278        | 669.3291     | 1.9              |
| Y <sub>16</sub> <sup>2+</sup>  | 1011.4944       | 1011.494     | -0.4             |
| Y <sub>17</sub> <sup>2+</sup>  | 1089.5449       | 1089.5424    | -2.3             |
| Y <sub>17</sub> <sup>2+▲</sup> | 988.0052        | 988.0082     | 3                |
| Y <sub>18</sub> <sup>2+</sup>  | 1147.0584       | 1147.0551    | -2.9             |
| Y <sub>18</sub> <sup>2+▲</sup> | 1045.5187       | 1045.5215    | 2.7              |
| Y <sub>19</sub> <sup>2+</sup>  | 1197.5822       | 1197.5818    | -0.3             |
| Y <sub>20</sub> <sup>2+▲</sup> | 1124.5533       | 1124.5481    | -4.6             |
| Y <sub>21</sub> <sup>2+</sup>  | 1283.1144       | 1283.1151    | 0.5              |
| Y <sub>21</sub> <sup>2+▲</sup> | 1181.5747       | 1181.5858    | 9.4              |
| Y <sub>22</sub> <sup>2+</sup>  | 1332.6486       | 1332.6501    | 1.1              |

|                |           |           |      |
|----------------|-----------|-----------|------|
| $Y_{22}^{2+▲}$ | 1231.109  | 1231.1139 | 4    |
| $Y_{23}^{2+}$  | 1397.1699 | 1397.1722 | 1.6  |
| $Z_1$          | 159.1002  | 159.1001  | -0.6 |
| $Z_2$          | 272.1843  | 272.1845  | 0.7  |
| $Z_4$          | 533.2956  | 533.2958  | 0.4  |
| $Z_5$          | 620.3277  | 620.3283  | 1    |
| $Z_6$          | 719.3961  | 719.397   | 1.3  |
| $Z_7$          | 834.423   | 834.4247  | 2    |
| $Z_8$          | 949.4499  | 949.4532  | 3.5  |
| $Z_{10}$       | 1135.5504 | 1135.5532 | 2.5  |
| $Z_{11}$       | 1321.6297 | 1321.6234 | -4.8 |
| $Z_{12}$       | 1408.6617 | 1408.6635 | 1.3  |
| $Z_{13}$       | 1698.7731 | 1698.7736 | 0.3  |

---

## Section S4 Supplementary References

1. Shen, D. L.; Gloster, T. M.; Yuzwa, S. A.; Vocadlo, D. J., Insights into O-linked N-acetylglucosamine (O-GlcNAc) processing and dynamics through kinetic analysis of O-GlcNAc transferase and O-GlcNAcase activity on protein substrates. *J Biol Chem* **2012**, *287* (19), 15395-408.
2. Yuzwa, S. A.; Yadav, A. K.; Skorobogatko, Y.; Clark, T.; Vosseller, K.; Vocadlo, D. J., Mapping O-GlcNAc modification sites on tau and generation of a site-specific O-GlcNAc tau antibody. *Amino Acids* **2011**, *40* (3), 857-68.
3. Klein, D. R.; Holden, D. D.; Brodbelt, J. S., Shotgun Analysis of Rough-Type Lipopolysaccharides Using Ultraviolet Photodissociation Mass Spectrometry. *Anal Chem* **2016**, *88* (1), 1044-51.
4. Fellers, R. T.; Greer, J. B.; Early, B. P.; Yu, X.; LeDuc, R. D.; Kelleher, N. L.; Thomas, P. M., ProSight Lite: graphical software to analyze top-down mass spectrometry data. *Proteomics* **2015**, *15* (7), 1235-8.
